# Supplementary material for: Diastereoselective indium-mediated allylation of N-tert-butanesulfinyl ketimines: easy access to asymmetric quaternary stereocenters bearing nitrogen atoms
Source: Royal Society of Chemistry journal article supplement (doi:10.1039/c2cc17493f), 2012-01-01

# Diastereoselective indium-mediated allylation of *N-tert*-butanesulfinyl ketimines: Easy access to asymmetric quaternary stereocenters bearing nitrogen atoms

Juan Alberto Sirvent, Francisco Foubelo,\* and Miguel Yus\*

Departamento de Química Orgánica, Facultad de Ciencias and Instituto de Síntesis Orgánica (ISO), Universidad de Alicante, Apdo. 99, 03080 Alicante, Spain. E-mail: [foubelo@ua.es](mailto:foubelo@ua.es); [yus@ua.es](mailto:yus@ua.es)

## Contents

|                                                                                               |             |
|-----------------------------------------------------------------------------------------------|-------------|
| <b>General Methods</b> .....                                                                  | page 2      |
| <b>Procedure and characterization data for <i>N-tert</i>-butanesulfinyl ketimines 1</b> ..... | pages 3-8   |
| <b>Procedure and characterization data for homoallylic amine derivatives 3</b> .....          | pages 8-15  |
| <b>Procedure and characterization data for amines 4</b> .....                                 | page 15-16  |
| <b>X-Ray structures of compounds 3i and 3j</b> .....                                          | page 17     |
| <b><sup>1</sup>H-NMR and <sup>13</sup>C-NMR spectra of compounds 1, 3 and 4</b> .....         | pages 18-47 |

**General Methods:** *N-tert*-butanesulfinamides ( $S_S$  and  $R_S$ ) were a gift of Medalchemy (>99% ee by chiral HPLC on a Chiracel AS column, 90:10 *n*-hexane/*i*-PrOH, 1.2 mL/min,  $\lambda=222$  nm). All other commercially available reagents were used as received.

TLC was performed on silica gel 60 F<sub>254</sub>, using aluminum plates and visualized with phosphomolybdic acid (PMA) stain. Flash chromatography was carried out on handpacked columns of silica gel 60 (230-400 mesh). Melting points are uncorrected. IR spectra were recorded as a film deposited from CDCl<sub>3</sub> or CH<sub>2</sub>Cl<sub>2</sub> on NaCl plates followed by solvent evaporation and all absorptions are reported in cm<sup>-1</sup>.

<sup>1</sup>H NMR spectra were recorded at 400 MHz using CDCl<sub>3</sub> or CD<sub>3</sub>OD as the solvent and TMS as internal standard (0.00 ppm). The data is being reported as [s = singlet, d = doublet, t = triplet, m = multiplet or unresolved, br s = broad signal, integration, coupling constant(s) in Hz]. <sup>13</sup>C NMR spectra were recorded with <sup>1</sup>H-decoupling at 100 MHz and referenced to CDCl<sub>3</sub> at 77.15 ppm. DEPT-135 experiments were performed to assign CH, CH<sub>2</sub> and CH<sub>3</sub>.

### General procedure for the synthesis of *N-tert-butanesulfinyl ketimines 1*:

A mixture of *N-tert-butanesulfonamide* (242 mg, 2.0 mmol), the corresponding ketone (2.0 mmol) and  $\text{Ti}(\text{OEt})_4$  (912 mg, 0.900 mL, 4.0 mmol) in THF (8 mL) was stirred for 12 h at 66 °C. Then, the resulting mixture was hydrolyzed with brine (8 mL), extracted with EtOAc ( $3 \times 10$  mL), dried over anhydrous  $\text{MgSO}_4$  and evaporated (15 Torr). The residue was purified by column chromatography (silica gel, hexane/EtOAc) to yield products **1**. Yields, physical and spectroscopic data follow.

### Characterization data of the obtained *N-tert-butanesulfinyl ketimines 1*

#### (*S,S,E*)-*N*-(*tert*-Butanesulfinyl)-1-phenylethanamine (**1a**):

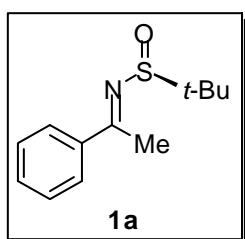

86% Yield; white solid; mp 36-40 °C;  $[\alpha]_D^{20} +13$  (*c* 1.03,  $\text{CH}_2\text{Cl}_2$ );  $R_f$  0.54 (hexane/EtOAc 1:1);  $^1\text{H}$  NMR (300 MHz,  $\text{CDCl}_3$ )  $\delta$  1.33 (s, 9H), 2.77 (s, 3H, s), 7.40-7.51 (m, 3H), 7.89 (d, 2H,  $J = 7.9$  Hz);  $^{13}\text{C}$  NMR (75 MHz,  $\text{CDCl}_3$ )  $\delta$  22.7 ( $\text{CH}_3$ ), 43.40 ( $\text{CH}_2$ ), 55.8 (C), 56.5 (CH), 119.75 ( $\text{CH}_2$ ), 121.6 (C), 129.35 (CH), 131.75 (CH), 133.8 (CH), 140.9 (C); IR (KBr) 1604, 1591, 1573, 1361, 1275, 1082, 1064, 768, 692, 680, 628  $\text{cm}^{-1}$ ; MS (EI)  $m/z$  167 ( $\text{M}^+ - 56$ , 22%), 207 (13), 151 (34), 150 (50), 136 (11), 119 (55), 105 (13), 104 (100), 103 (41), 78 (12), 77 (51), 76.

#### (*S,S,E*)-*N*-(*tert*-Butanesulfinyl)-1-phenylpropanamine (**1b**):

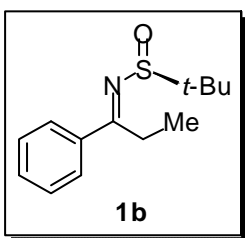

63% Yield; yellow oil;  $[\alpha]_D^{20} +9$  (*c* 1.06,  $\text{CH}_2\text{Cl}_2$ );  $R_f$  0.67 (hexane/EtOAc 1:1);  $^1\text{H}$  NMR (300 MHz,  $\text{CDCl}_3$ )  $\delta$  1.29 (t, 3H,  $J = 7.7$  Hz), 1.33 (s, 9H), 3.16-3.34 (m, 2H), 7.39-7.52 (m, 3H), 7.80-7.95 (m, 2H);  $^{13}\text{C}$  NMR (75 MHz,  $\text{CDCl}_3$ )  $\delta$  13.3 ( $\text{CH}_3$ ), 22.8 ( $\text{CH}_3$ ), 26.0 ( $\text{CH}_2$ ), 57.5 (C), 127.6, 128.7, 131.7 (CH), 137.6 (C), 181.3 (C=N); IR (film) 2977, 2359, 1592, 1569, 1071, 693  $\text{cm}^{-1}$ ; MS (EI)  $m/z$  132 ( $\text{M}^+ - 105$ , 46%), 105 (12), 104 (100), 103 (36), 77 (34), 76 (16), 64 (11), 56 (12), 51 (16), 50 (10).

**(*S<sub>S</sub>,E*)-*N*-(*tert*-Butanesulfinyl)-1-(2-naphthyl)ethanimine (1c):**

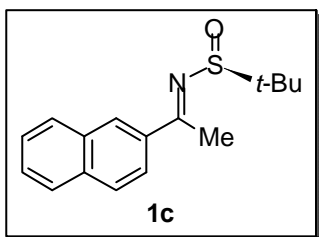

76% Yield; yellow solid; mp 118-121 °C;  $[\alpha]_D^{20} +6$  (*c* 0.98, CH<sub>2</sub>Cl<sub>2</sub>); R<sub>f</sub> 0.56 (hexane/EtOAc 1:1); <sup>1</sup>H NMR (300 MHz, CDCl<sub>3</sub>) δ 1.36 (s, 9H), 2.88 (s, 3H), 7.50-7.58 (m, 2H), 7.82-7.87 (m, 2H), 7.91 (dd, 1H, *J* = 8.1, 6.5 Hz), 8.07 (dd, 1H, *J* = 8.7, 1.4 Hz), 8.28-8.31 (m, 1H); <sup>13</sup>C NMR (75 MHz, CDCl<sub>3</sub>) δ 19.9 (CH<sub>3</sub>), 22.7 (CH<sub>3</sub>), 57.7 (C), 124.0, 126.8, 127.8, 128.0, 128.3, 128.3, 129.3 (ArCH), 132.8, 135.0, 136.2 (C), 176.2 (C=N); IR (KBr) 2360, 1587, 1571, 1289, 1075 cm<sup>-1</sup>; MS (EI) *m/z* 169 (M<sup>+</sup>-104, 56%), 199 (29), 170 (11), 155 (21), 154 (100), 153 (40), 128 (15), 127 (48), 126 (21), 77 (16), 63 (10).

**(*S<sub>S</sub>,E*)-*N*-(*tert*-Butanesulfinyl)-3,4-dihydronaphthalen-1(2*H*)-imine (1d):**

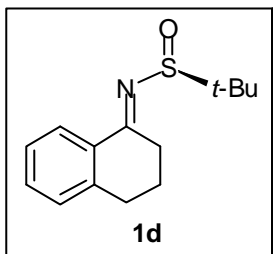

39% Yield; yellow solid; mp 40 °C (CH<sub>2</sub>Cl<sub>2</sub>);  $[\alpha]_D^{20} +27$  (*c* 0.84, CH<sub>2</sub>Cl<sub>2</sub>); R<sub>f</sub> 0.52 (hexane/EtOAc 1:1); <sup>1</sup>H NMR (300 MHz, CDCl<sub>3</sub>) δ 1.33 (s, 9H), 1.88-2.13 (m, 2H), 2.88 (t, 2H, *J* = 6.2 Hz), 3.06 (ddd, 1H, *J* = 17.5, 7.2, 4.8 Hz), 3.29 (ddd, 1H, *J* = 17.5, 8.9, 5.1 Hz), 7.20 (t, 1H, *J* = 8.1 Hz), 7.24-7.29 (m, 1H), 7.39 (td, 1H, *J* = 7.4, 1.4 Hz), 8.17 (d, 1H, *J* = 7.9 Hz); <sup>13</sup>C NMR (75 MHz, CDCl<sub>3</sub>) δ 22.5 (CH<sub>3</sub>), 22.7, 29.5, 32.4 (CH<sub>2</sub>), 57.2 (C), 126.5, 127.0, 128.9, 132.0 (CH), 133.0, 142.2 (C), 177.0 (C=N); IR (KBr) 2945, 2161, 1609, 1578, 1563, 1451, 1359, 1293, 1192, 1077, 1061, 1027, 903, 774, 731, 672 cm<sup>-1</sup>; MS (EI) *m/z* 177 (M<sup>+</sup>-72, 22%), 191 (13), 145 (63), 144 (34), 143 (89), 142 (19), 130 (18), 129 (19), 128 (28), 118 (13), 117 (100), 116 (47), 115 (57), 90 (21), 89 (27), 64 (15), 63 (12), 56 (12), 51 (11).

**(*S<sub>S</sub>,E*)-*N*-(*tert*-Butanesulfinyl)chroman-4-imine (1e):**

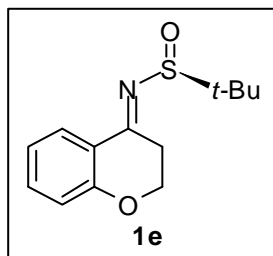

90% Yield; yellow oil;  $[\alpha]_D^{20} +98$  (*c* 1.03, CH<sub>2</sub>Cl<sub>2</sub>); R<sub>f</sub> 0.52 (hexane/EtOAc 1:1); <sup>1</sup>H NMR (300 MHz, CDCl<sub>3</sub>) δ 1.33 (s, 9H), 3.27 (ddd, 1H, *J* = 17.4, 7.3, 4.3 Hz), 3.51 (ddd, 1H, *J* = 17.4, 8.6, 4.8 Hz), 4.24-4.44 (m, 2H), 6.92 (dd, 1H, *J* = 8.3, 0.9 Hz), 6.97 (ddd, 1H, *J* = 8.1, 7.2, 1.1 Hz), 7.38 (ddd, 1H, *J* = 8.4, 7.2, 1.7 Hz), 8.00 (dd, 1H, *J* = 8.0, 1.7 Hz); <sup>13</sup>C NMR (75 MHz, CDCl<sub>3</sub>) δ 22.6 (CH<sub>3</sub>), 30.7 (CH<sub>2</sub>), 58.0 (C), 65.5 (CH<sub>2</sub>), 118.0 (CH), 121.1 (ArC), 121.3, 126.9, 134.2 (ArCH), 159.2, 169.6 (C); IR (film) 2958, 1588, 1478, 1454, 1307, 1258, 1215, 1078, 1056,

1041, 877, 827, 761  $\text{cm}^{-1}$ ; MS (EI)  $m/z$  147 ( $\text{M}^+$ -104, 63%), 146 (15), 145 (28), 120 (11), 119 (100), 118 (12), 91 (48), 80 (13), 64 (26), 63 (14), 56 (17).

**(*S<sub>S</sub>*)-*N*-(*tert*-Butanesulfinyl)but-3-en-2-imine (1f, 3:1 diastereomeric mixture):**

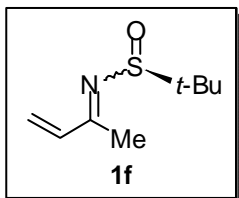

43% Yield; yellow oil;  $R_f$  0.51 (hexane/EtOAc 1:1); major diastereoisomer  $^1\text{H}$  NMR (300 MHz,  $\text{CDCl}_3$ )  $\delta$  1.26 (s, 9H), 2.45 (s, 3H), 5.72 (d, 1H,  $J = 10.8$  Hz), 5.96 (d, 1H,  $J = 17.7$  Hz), 6.46 (dd, 1H,  $J = 17.7, 10.8$  Hz); minor diastereoisomer  $^1\text{H}$  NMR (300 MHz,  $\text{CDCl}_3$ )  $\delta$  1.26 (s, 9H), 2.32 (s, 3H), 5.78 (d, 1H,  $J = 10.9$  Hz), 5.90 (d, 1H,  $J = 17.3$  Hz), 7.43 (dd, 1H,  $J = 17.3, 10.9$  Hz); major diastereoisomer  $^{13}\text{C}$  NMR (75 MHz,  $\text{CDCl}_3$ )  $\delta$  22.1, 22.3 ( $\text{CH}_3$ ), 57.1 (C), 124.5 ( $\text{CH}_2$ ), 139.5 (CH), 176.5 (C=N); minor diastereoisomer  $^{13}\text{C}$  NMR (75 MHz,  $\text{CDCl}_3$ )  $\delta$  22.1, 22.3 ( $\text{CH}_3$ ), 57.1 (C), 124.5 ( $\text{CH}_2$ ), 139.5 (CH), 176.5 (C=N); IR (film) 2958, 1588, 1478, 1454, 1307, 1258, 1215, 1078, 1056, 1041, 877, 827, 761  $\text{cm}^{-1}$ ; MS (EI)  $m/z$  117 ( $\text{M}^+$ -56, 100%), 102 (11), 101 (18), 100 (29), 99 (36), 73 (10), 69 (43), 64 (19), 58 (15), 57 (76), 56 (33), 55 (17), 54 (27), 53 (16); HRMS: Calculated for  $\text{C}_4\text{H}_7\text{NOS}$  ( $\text{M}^+$ - $\text{C}_4\text{H}_8$ ): 117.0248; found: 117.0249.

**(*S<sub>S</sub>*)-*N*-(*tert*-Butanesulfinyl)pent-1-en-3-imine (1g, 63:37 diastereomeric mixture):**

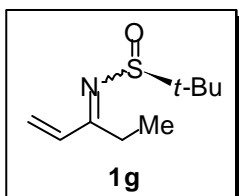

44% Yield; yellow oil;  $R_f$  0.64 (hexane/EtOAc 1:1); major diastereoisomer  $^1\text{H}$  NMR (300 MHz,  $\text{CDCl}_3$ )  $\delta$  1.15 (t, 3H,  $J = 6.9$  Hz), 1.26 (s, 9H), 2.57-2.77 (m, 2H), 5.73 (d, 1H,  $J = 11.2$  Hz), 5.88 (d, 1H,  $J = 17.6$  Hz), 7.40 (dd, 1H,  $J = 17.4, 11.3$  Hz); minor diastereoisomer  $^1\text{H}$  NMR (300 MHz,  $\text{CDCl}_3$ )  $\delta$  1.15 (t, 3H,  $J = 6.9$  Hz), 1.26 (s, 9H), 2.80-2.98 (m, 2H), 5.68 (d, 1H,  $J = 11.6$  Hz), 5.99 (d, 1H,  $J = 17.9$  Hz), 6.36 (dd, 1H,  $J = 16.9, 11.0$  Hz); major diastereoisomer  $^{13}\text{C}$  NMR (75 MHz,  $\text{CDCl}_3$ )  $\delta$  10.5, 22.5 ( $\text{CH}_3$ ), 29.4 ( $\text{CH}_2$ ), 57.7 (C), 125.2 ( $\text{CH}_2$ ), 131.4 (CH), 181.0 (C=N); minor diastereoisomer  $^{13}\text{C}$  NMR (75 MHz,  $\text{CDCl}_3$ )  $\delta$  13.0, 22.5 ( $\text{CH}_3$ ), 25.2 ( $\text{CH}_2$ ), 57.1 (C), 124.1 ( $\text{CH}_2$ ), 137.7 (CH), 178.0 (C=N); IR (film) 2976, 1575, 1361, 1072, 942  $\text{cm}^{-1}$ ; MS (EI)  $m/z$  131 ( $\text{M}^+$ -56, 100%), 115 (14), 114 (31), 113 (29), 112 (47), 86 (17), 83 (75), 82 (60), 67 (10), 64 (12), 59 (10), 58 (12), 57 (88), 56 (37), 55 (26), 54 (51), 53 (12); HRMS: Calculated for  $\text{C}_5\text{H}_9\text{NOS}$  ( $\text{M}^+$ - $\text{C}_4\text{H}_8$ ): 131.0405; found: 131.0409.

**(*S<sub>S</sub>*)-*N*-(*tert*-Butanesulfinyl)cyclopent-2-enimine (**1h**, 65:35 diastereomeric mixture):**

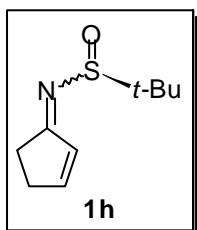

38% Yield; orange oil;  $R_f$  0.30 (hexane/EtOAc 1:1); diastereomeric mixture  $^1\text{H}$  NMR (300 MHz,  $\text{CDCl}_3$ )  $\delta$  1.24 and 1.26 (2s, 9H), 2.55-2.60 (m, 0.65H), 2.69-2.75 (m, 2H), 2.75-2.80 (m, 0.35H), 3.11-3.22 (m, 1H), 6.32-6.38 (m, 1H), 7.11-7.18 (m, 0.65H), 7.18-7.24 (m, 0.35); major diastereoisomer  $^{13}\text{C}$  NMR (75 MHz,  $\text{CDCl}_3$ )  $\delta$  22.4 ( $\text{CH}_3$ ), 30.3, 32.5 ( $\text{CH}_2$ ), 56.7 (C), 135.5, 156.1 (CH), 189.4 ( $\text{C}=\text{N}$ ); minor diastereoisomer  $^{13}\text{C}$  NMR (75 MHz,  $\text{CDCl}_3$ )  $\delta$  22.5 ( $\text{CH}_3$ ), 29.1, 34.5 ( $\text{CH}_2$ ), 57.1 (C), 128.9 (CH), 158.3 (CH), 186.8 ( $\text{C}=\text{N}$ ); IR (film) 2957, 1600, 1360, 1201, 1068, 754, 722  $\text{cm}^{-1}$ ; MS (EI)  $m/z$  129 ( $\text{M}^+-56$ , 100%), 113 (18), 81 (24), 80 (30), 66 (33), 57 (32), 53 (16); HRMS: Calculated for  $\text{C}_5\text{H}_7\text{NOS}$  ( $\text{M}^+-\text{C}_4\text{H}_8$ ): 129.0248; found: 129.0247.

**(*S<sub>S</sub>*)-*N*-(*tert*-Butanesulfinyl)cyclohex-2-enimine (**1i**, 3:2 diastereomeric mixture):**

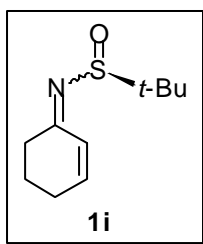

76% Yield; yellow oil;  $R_f$  0.41 (hexane/EtOAc 1:1); diastereomeric mixture  $^1\text{H}$  NMR (300 MHz,  $\text{CDCl}_3$ )  $\delta$  1.24 (s, 9H), 1.79-2.01 (m, 2H, m), 2.25-2.34 (m, 2H), 2.57 (dd, 08H,  $J = 7.8, 5.3$  Hz), 2.83 (ddd, 0.6H,  $J = 17.0, 7.5, 5.0$  Hz), 3.05 (ddd, 0.6H,  $J = 17.0, 9.0, 5.0$  Hz), 6.21 (dt, 0.6H,  $J = 10.3, 1.8$  Hz), 6.61-6.72 (m, 1H), 7.10 (dt, 0.4H,  $J = 10.2, 2.3$  Hz); major diastereoisomer  $^{13}\text{C}$  NMR (75 MHz,  $\text{CDCl}_3$ )  $\delta$  21.9 ( $\text{CH}_2$ ), 22.2 ( $\text{CH}_3$ ), 25.2, 30.9 ( $\text{CH}_2$ ), 56.5 (C), 130.4, 144.8 (CH), 177.9 ( $\text{C}=\text{N}$ ); minor diastereoisomer  $^{13}\text{C}$  NMR (75 MHz,  $\text{CDCl}_3$ )  $\delta$  22.3 ( $\text{CH}_3$ ), 22.5, 26.0, 36.1 ( $\text{CH}_2$ ), 56.9 (C), 123.1, 146.0 (CH), 175.7 ( $\text{C}=\text{N}$ ); IR (film) 2924, 2359, 1620, 1568, 1361, 1071, 869, 736  $\text{cm}^{-1}$ ; MS (EI)  $m/z$  143 ( $\text{M}^+-56$ , 100%), 127 (26), 95 (48), 94 (28), 93 (27), 80 (13), 79 (11), 67 (47), 66 (25), 65 (15), 64 (25), 57 (35), 56 (25), 55 (13).

**(*S<sub>S</sub>*)-*N*-(*tert*-Butanesulfinyl)cyclohept-2-enimine (**1j**, 53:47 diastereomeric mixture):**

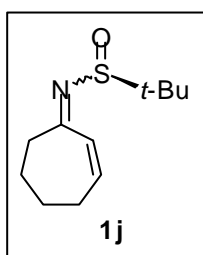

48% Yield; yellow oil;  $R_f$  0.51 (hexane/EtOAc 1:1); major diastereoisomer  $^1\text{H}$  NMR (300 MHz,  $\text{CDCl}_3$ )  $\delta$  1.23 (s, 9H), 1.67-1.97 (m, 4H), 2.29-2.49 (m, 2H), 2.65-2.75 (m, 1H), 2.83-2.96 (m, 1H), 6.42 (ddd, 1H,  $J = 17.7, 11.4, 5.6$  Hz), 6.89 (d, 1H,  $J = 11.7$  Hz); minor diastereoisomer  $^1\text{H}$  NMR (300 MHz,  $\text{CDCl}_3$ )  $\delta$  1.24 (s, 9H), 1.67-1.97 (m, 4H), 2.29-2.49 (m, 2H), 2.65-2.75 (m, 1H), 3.10-3.22 (m, 1H), 6.22 (d, 1H,  $J = 11.7$  Hz), 6.42 (ddd, 1H,  $J = 17.7, 11.4, 5.6$  Hz); major diastereoisomer  $^{13}\text{C}$  NMR (75 MHz,  $\text{CDCl}_3$ )  $\delta$  22.3 ( $\text{CH}_3$ ), 24.8, 26.0, 28.9, 40.8 ( $\text{CH}_2$ ),

57 (C), 127.1, 144.4 (CH), 180.2 (C=N); minor diastereoisomer  $^{13}\text{C}$  NMR (75 MHz,  $\text{CDCl}_3$ )  $\delta$  22.3 ( $\text{CH}_3$ ), 24.3, 26.5, 29.1, 35.4 ( $\text{CH}_2$ ), 56.4 (C), 133.6, 143.8 (CH), 182.7 (C=N); IR (film) 2928, 1622, 1570, 1454, 1360, 1173, 1071, 744  $\text{cm}^{-1}$ ; MS (EI)  $m/z$  157 ( $\text{M}^+$ -56, 58%), 197 (37), 157 (58), 142 (11), 141 (100), 140 (26), 139 (13), 126 (11), 113 (11), 112 (16), 109 (36), 108 (36), 107 (15), 106 (30), 99 (12), 95 (11), 94 (39), 93 (20), 92 (13), 91 (17), 81 (34), 80 (51), 79 (39), 78 (14), 77 (21), 67 (38), 66 (17), 65 (13), 64 (27), 57 (82), 55 (27), 54 (22), 53 (28), 52 (14), 51 (17), 50 (11); HRMS: Calculated for  $\text{C}_7\text{H}_{11}\text{NOS}$  ( $\text{M}^+$ - $\text{C}_4\text{H}_8$ ): 157.0561; found: 157.0557.

**(*S,S,E*)-*N*-(*tert*-Butanesulfinyl)butan-2-imine (1k):**

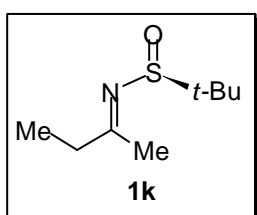

60% Yield; yellow oil;  $[\alpha]_D^{20}$  +98 ( $c$  1.2,  $\text{CH}_2\text{Cl}_2$ );  $R_f$  0.45 (hexane/EtOAc 1:1);  $^1\text{H}$  NMR (300 MHz,  $\text{CDCl}_3$ )  $\delta$  1.11 (t, 3H,  $J$  = 7.3 Hz), 1.24 (s, 9H), 2.32 (s, 3H), 2.39-2.49 (m, 2H);  $^{13}\text{C}$  NMR (75 MHz,  $\text{CDCl}_3$ )  $\delta$  9.9, 22.1 ( $\text{CH}_3$ ), 22.8, 36.6 ( $\text{CH}_2$ ), 56.3 (C), 186.1 (C=N); IR (film) 3237, 2977, 2959, 2359, 1621, 1458, 1362, 1192, 1053  $\text{cm}^{-1}$ ; MS (EI)  $m/z$  119 ( $\text{M}^+$ -56, 100%), 74 (10), 71 (81), 70 (20), 57 (67), 56 (20), 55 (13).

**(*S,S,E*)-*N*-(*tert*-Butanesulfinyl)-3-methylbutan-2-imine (1l):**

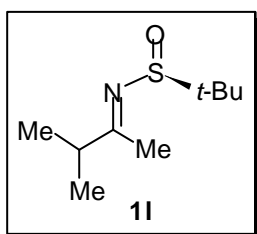

73% Yield; yellow oil;  $[\alpha]_D^{20}$  +198 ( $c$  1.2,  $\text{CH}_2\text{Cl}_2$ );  $R_f$  0.51 (hexane/EtOAc 1:1);  $^1\text{H}$  NMR (300 MHz,  $\text{CDCl}_3$ )  $\delta$  1.13 (d, 3H,  $J$  = 6.8 Hz), 1.14 (d, 3H,  $J$  = 6.8 Hz), 1.24 (s, 9H), 2.32 (s, 3H), 2.49-2.64 (m, 1H);  $^{13}\text{C}$  NMR (75 MHz,  $\text{CDCl}_3$ )  $\delta$  19.6, 19.8 ( $\text{CH}_3$ ), 21.1 (CH), 22.2, 41.3 ( $\text{CH}_3$ ), 56.4 (C), 189.2 (C=N); IR (film) 2967, 2928, 2871, 1623, 1459, 1362, 1094, 1072, 792, 671  $\text{cm}^{-1}$ ; MS (EI)  $m/z$  133 ( $\text{M}^+$ -56, 84%), 85 (39), 84 (12), 74 (14), 70 (100), 69 (11), 57 (65), 55 (10).

**(*S,S,E*)-*N*-(*tert*-Butanesulfinyl)heptan-2-imine (1m):**

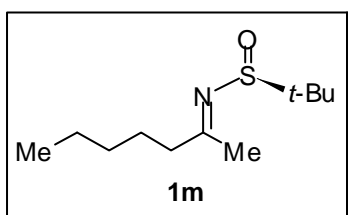

75% Yield; yellow oil;  $[\alpha]_D^{20}$  +144 ( $c$  1.07,  $\text{CH}_2\text{Cl}_2$ );  $R_f$  0.59 (hexane/EtOAc 1:1);  $^1\text{H}$  NMR (300 MHz,  $\text{CDCl}_3$ )  $\delta$  0.89 (t, 3H,  $J$  = 6.9 Hz), 1.24 (s, 9H), 1.26-1.38 (m, 4H), 1.53-1.69 (m, 2H), 2.31 (s, 3H), 2.35-2.44 (m, 2H);  $^{13}\text{C}$  NMR (75 MHz,  $\text{CDCl}_3$ )  $\delta$  13.9, 22.1 ( $\text{CH}_3$ ), 22.4 ( $\text{CH}_2$ ), 23.0 ( $\text{CH}_3$ ), 25.2, 31.3, 43.4 ( $\text{CH}_2$ ), 56.2 (C), 185.6 (C); IR (film) 2955, 2928, 2862, 1622, 1457, 1362, 1187, 1074, 669  $\text{cm}^{-1}$ ; MS (EI)  $m/z$  161 ( $\text{M}^+$ -56, 58%), 112 (15), 105

(56), 97 (26), 96 (20), 89 (43), 82 (10), 70 (17), 64 (60), 58 (11), 57 (100), 56 (71), 55 (54), 54 (12), 53 (15), 50 (11); HRMS: Calculated for  $C_7H_{15}NOS$  ( $M^+ - C_4H_8$ ): 161.0874; found: 161.0870.

**(*R*<sub>S</sub>,*E*)-*N*-(*tert*-Butanesulfinyl)heptan-2-imine (*ent*-1m):**

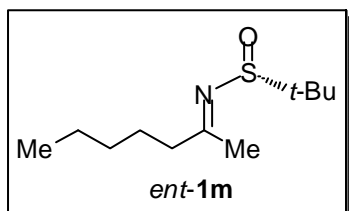

73% Yield; physical and spectroscopic data were found to be same than for **1m**.  $[\alpha]_D^{20} -156$  (*c* 1.07,  $CH_2Cl_2$ ).

**General procedure for the stereoselective allylation of *N*-*tert*-butanesulfinyl ketimines **1**:**

A mixture of *N*-*tert*-butanesulfinyl ketimine **1** (0.5 mmol), the corresponding allylic bromide (1.0 mmol) and indium (115 mg, 1.0 mmol) in dry THF (2 mL) was stirred for 6 h at 66 °C. Then, the resulting mixture was hydrolyzed with  $H_2O$  (5 mL), extracted with EtOAc ( $3 \times 10$  mL), dried over anhydrous  $MgSO_4$  and evaporated (15 Torr). The residue was purified by column chromatography (silica gel, hexane/EtOAc) to yield products **3**. Yields are given on Table 1. Physical and spectroscopic data follow.

**Characterization data of the obtained homoallylic amine derivatives **3****

**(*2R*,*S*<sub>S</sub>)-*N*-(*tert*-Butanesulfinyl)-2-phenylpent-4-en-2-amine (**3a**):**

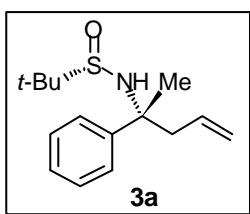

White solid; mp 38-41 °C ( $CH_2Cl_2$ );  $R_f$  0.57 (hexane/EtOAc 1:2);  $^1H$  NMR (300 MHz,  $CDCl_3$ )  $\delta$  1.23 (s, 9H), 1.77 (s, 3H), 2.69 (d, 2H,  $J = 7.4$  Hz), 3.77 (s, 1H), 5.01-5.24 (m, 2H), 5.42-5.65 (m, 1H), 7.21-7.51 (m, 5H);  $^{13}C$  NMR (75 MHz,  $CDCl_3$ )  $\delta$  22.9, 27.8 ( $CH_3$ ), 49.1 ( $CH_2$ ), 56.2 (C), 59.9 (C), 120.4 ( $CH_2$ ), 126.3, 127.0, 128.2, 133.1 (CH), 145.4 (C); IR (KBr) 3364, 3183, 2160, 1676, 1450, 996, 933, 777, 706  $cm^{-1}$ ; MS (EI)  $m/z$  209 ( $M^+ - 56$ , 6%), 194 (18), 189 (21), 188 (13), 175 (13), 168 (10), 167 (100), 150 (22), 145 (16), 131 (29), 129 (11), 128 (10), 119 (37), 117 (11), 104 (52), 103 (19), 91 (24), 77 (32), 51 (14).



**(2*S,S*)-*N*-(*tert*-Butanesulfinyl)-2-phenylpent-4-en-2-amine (3a')**

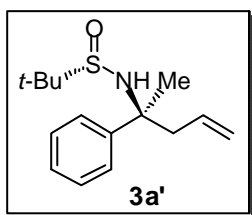

$R_f$  0.57 (hexane/EtOAc 1:2);  $^1\text{H}$  NMR (300 MHz,  $\text{CDCl}_3$ )  $\delta$  1.24 (s, 9H), 1.71 (s, 3H), 2.59-2.84 (m, 2H), 3.65 (s, 1H), 5.01-5.24 (m, 2H), 5.42-5.65 (m, 1H), 7.21-7.51 (m, 5H);  $^{13}\text{C}$  NMR (75 MHz,  $\text{CDCl}_3$ )  $\delta$  22.8, 28.3 ( $\text{CH}_3$ ), 47.8 ( $\text{CH}_2$ ), 56.2, 60.4 (C), 119.1 ( $\text{CH}_2$ ), 126.3, 127.1, 128.2, 133.4 (CH), 145.5 (C).

**(3*R,S*)-*N*-(*tert*-Butanesulfinyl)-3-phenylhex-5-en-3-amine (3b)**

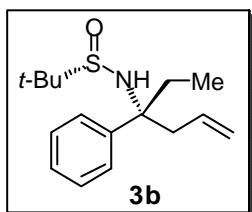

Yellow oil;  $R_f$  0.63 (hexane/EtOAc 1:2);  $^1\text{H}$  NMR (300 MHz,  $\text{CDCl}_3$ )  $\delta$  0.76 (t, 3H,  $J = 7.3$  Hz), 1.26 (s, 9H), 1.95-2.11 (m, 2H), 2.74-2.90 (m, 2H), 3.75 (s, 1H), 5.04-5.15 (m, 2H), 5.61 (ddt, 1H,  $J = 17.1, 10.2, 7.2$  Hz), 7.21-7.44 (m, 5H);  $^{13}\text{C}$  NMR (75 MHz,  $\text{CDCl}_3$ )  $\delta$  8.0, 22.9 ( $\text{CH}_3$ ), 33.3, 43.8 ( $\text{CH}_2$ ), 56.4, 63.6 (C), 119.2 ( $\text{CH}_2$ ), 126.8, 127.0, 128.2, 133.2 (CH), 143.4 (C); IR (film) 2926, 1738, 1446, 1063, 912, 761, 731, 700  $\text{cm}^{-1}$ ; MS (EI)  $m/z$  235 ( $\text{M}^+ - 44$ , 18%), 194 (12), 193 (100), 171 (12), 157 (14), 145 (34), 144 (43), 143 (15), 141 (12), 130 (20), 129 (41), 128 (25), 117 (33), 116 (16), 115 (23), 91 (13); HRMS: Calculated for  $\text{C}_{13}\text{H}_{17}\text{NOS}$  [ $\text{M}^+ - (\text{Et}, \text{Me})$ ] 235.1031; found: 235.1030.

**(3*S,S*)-*N*-(*tert*-Butanesulfinyl)-3-phenylhex-5-en-3-amine (3b')**

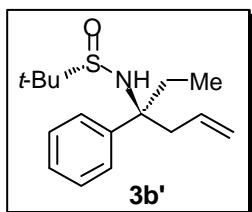

$R_f$  0.63 (hexane/EtOAc 1:2);  $^1\text{H}$  NMR (300 MHz,  $\text{CDCl}_3$ )  $\delta$  0.71 (t, 3H,  $J = 7.3$  Hz), 1.30 (s, 9H), 2.30 (dq, 2H,  $J = 14.4, 7.2$  Hz), 2.74-2.90 (m, 2H), 3.91 (s, 1H), 5.09-5.26 (m, 2H), 5.34-5.52 (m, 1H), 7.21-7.44 (m, 5H);  $^{13}\text{C}$  NMR (75 MHz,  $\text{CDCl}_3$ )  $\delta$  8.1, 23.0 ( $\text{CH}_3$ ), 32.5, 45.8 ( $\text{CH}_2$ ), 56.4, 63.4 (C), 121.1 ( $\text{CH}_2$ ), 126.4, 126.7, 128.2, 132.9 (CH), 143.8 (C).

**(2*R,S*)-*N*-(*tert*-Butanesulfinyl)-2-(2-naphthyl)pent-4-en-2-amine (3c)**

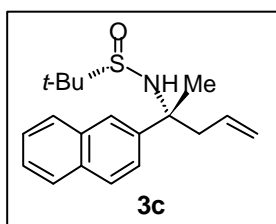

White solid; mp 43-46  $^\circ\text{C}$ ;  $[\alpha]_D^{20} +46$  ( $c$  0.65,  $\text{CH}_2\text{Cl}_2$ );  $R_f$  0.55 (hexane/EtOAc 1:2);  $^1\text{H}$  NMR (300 MHz,  $\text{CDCl}_3$ )  $\delta$  1.24 (s, 9H), 1.89 (s, 3H), 2.75 (d, 2H,  $J = 7.3$  Hz), 3.83 (br s, 1H), 5.08-5.24 (m, 2H), 5.58 (ddt, 1H,  $J = 17.3, 10.1, 7.3$  Hz), 7.42-7.52 (m, 2H), 7.57 (dd, 1H,  $J = 8.8, 1.7$  Hz), 7.77-7.89 (m, 4H);  $^{13}\text{C}$  NMR (75 MHz,  $\text{CDCl}_3$ )  $\delta$  23.0, 27.7 ( $\text{CH}_3$ ), 49.2 ( $\text{CH}_2$ ), 56.4, 60.2 (C), 120.5

(CH<sub>2</sub>), 125.0, 125.5, 126.2, 126.3, 127.5, 128.1, 128.4 (ArCH), 132.5, 133.1 (C), 133.2 (CH), 142.6 (C); IR (KBr) 3214, 2977, 2359, 1381, 1364, 1047, 961, 819, 748 cm<sup>-1</sup>; MS (EI) *m/z* 259 (M<sup>+</sup>-56, 32%), 244 (46), 243 (11), 239 (14), 228 (11), 226 (28), 225 (35), 224 (12), 217 (56), 200 (13), 195 (27), 194 (11), 181 (44), 180 (12), 179 (16), 178 (17), 170 (14), 169 (100), 168 (12), 167 (13), 166 (19), 165 (34), 155 (11), 154 (64), 153 (34), 152 (24), 141 (11), 128 (22), 127 (45), 126 (16), 115 (14), 77 (11); HRMS: Calculated for C<sub>15</sub>H<sub>17</sub>NOS (M<sup>+</sup>-C<sub>4</sub>H<sub>8</sub>) 259.1031; found: 259.1027.

**(2*S,S*)-*N*-(*tert*-Butanesulfinyl)-2-(2-naphthyl)pent-4-en-2-amine (3c')**:

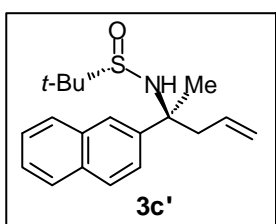

Yellow oil; [ $\alpha$ ]<sub>D</sub><sup>20</sup> +4.2 (*c* 0.73, CH<sub>2</sub>Cl<sub>2</sub>); R<sub>f</sub> 0.55 (hexane/EtOAc 1:2); <sup>1</sup>H NMR (300 MHz, CDCl<sub>3</sub>)  $\delta$  1.26 (s, 9H), 1.79 (s, 3H), 2.76 (dd, 1H, *J* = 13.6, 7.4 Hz), 2.92 (dd, 1H, *J* = 13.6, 7.0 Hz), 3.73 (br s, 1H), 5.02-5.15 (m, 2H), 5.53 (ddt, 1H, *J* = 17.3, 10.1, 7.2 Hz), 7.44-7.51 (m, 2H), 7.59 (dd, 1H, *J* = 8.7, 1.9 Hz), 7.78-7.89 (m, 3H), 7.92 (dd, 1H, *J* = 8.7, 1.3 Hz); <sup>13</sup>C NMR (75 MHz, CDCl<sub>3</sub>)  $\delta$  22.9, 28.5 (CH<sub>3</sub>), 47.6 (CH<sub>2</sub>), 56.4, 60.6 (C), 119.5 (CH<sub>2</sub>), 124.9, 125.3, 126.3, 127.5, 128.2, 128.5 (CH), 132.6, 133.1 (C), 133.5 (CH), 142.8 (C).

**(1*R,S*)-*N*-(*tert*-Butanesulfinyl)-1-allyl-1,2,3,4-tetrahydronaphthalen-1-amine (3d)**:

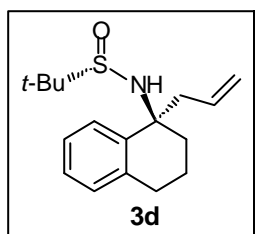

Orange oil; R<sub>f</sub> 0.49 (hexane/EtOAc 1:2); <sup>1</sup>H NMR (300 MHz, CDCl<sub>3</sub>)  $\delta$  1.19 (s, 9H), 1.75-1.98 (m, 2H), 2.01-2.21 (m, 2H), 2.67-2.69 (m, 4H), 3.62 (s, 1H), 4.98-5.21 (m, 2H), 5.50-5.63 (m, 1H), 7.06-7.14 (m, 1H), 7.15-7.24 (m, 2H), 7.46-7.50 (m, 1H); <sup>13</sup>C NMR (75 MHz, CDCl<sub>3</sub>)  $\delta$  18.8 (CH<sub>2</sub>), 22.7 (CH<sub>3</sub>), 29.9, 36.4, 46.6 (CH<sub>2</sub>), 56.0, 58.7 (C), 118.9 (CH<sub>2</sub>), 125.9, 127.3, 128.0, 129.3, 133.8 (CH), 137.8 (C), 139.0 (C); IR (film) 2938, 2364, 2323, 1448, 1046, 912, 760, 731 cm<sup>-1</sup>; MS (EI) *m/z* 235 (M<sup>+</sup>-56, 18%), 194 (12), 193 (100), 171 (12), 157 (14), 145 (34), 144 (43), 143 (15), 141 (12), 130 (20), 129 (41), 128 (25), 117 (33), 116 (16), 115 (23), 91 (13); HRMS: Calculated for C<sub>13</sub>H<sub>17</sub>NOS (M<sup>+</sup>-C<sub>4</sub>H<sub>8</sub>) 235.1031; found: 235.1035.

**(4*S,S*)-*N*-(*tert*-Butanesulfinyl)-4-allylchroman-4-amine (3e)**:

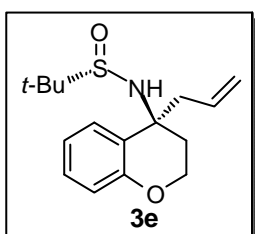

Yellow oil; [ $\alpha$ ]<sub>D</sub><sup>20</sup> +61 (*c* 0.87, CH<sub>2</sub>Cl<sub>2</sub>); R<sub>f</sub> 0.40 (hexane/EtOAc 1:2); <sup>1</sup>H NMR (300 MHz, CDCl<sub>3</sub>)  $\delta$  1.19 (s, 9H), 2.09-2.30 (m, 2H), 2.86 (ddd, 2H, *J* = 19.9, 13.9, 7.3 Hz), 3.70 (s, 1H), 4.26

(dd, 2H,  $J = 8.9, 3.4$  Hz), 5.15 (d, 1H,  $J = 17.2$  Hz), 5.18 (d, 1H,  $J = 24.1$  Hz), 5.62 (dddd, 1H,  $J = 14.5, 10.0, 8.4, 6.1$  Hz), 6.84 (dd, 1H,  $J = 8.2, 1.1$  Hz), 6.90-6.99 (m, 1H), 7.16-7.23 (m, 1H), 7.47 (dd, 1H,  $J = 7.9, 1.5$  Hz);  $^{13}\text{C}$  NMR (75 MHz,  $\text{CDCl}_3$ )  $\delta$  22.7 ( $\text{CH}_3$ ), 35.0, 45.6 ( $\text{CH}_2$ ), 55.0, 56.1 (C), 62.2 ( $\text{CH}_2$ ), 117.4 (CH), 120.1 ( $\text{CH}_2$ ), 120.3 (CH), 123.9 (C), 128.5, 129.4, 132.9 (CH), 154.8 (C); IR (film) 3208, 2957, 1608, 1579, 1488, 1451, 1223, 1055, 754  $\text{cm}^{-1}$ ; MS (EI)  $m/z$  237 ( $\text{M}^+ - 56, 55\%$ ), 207 (19), 195 (45), 175 (14), 174 (100), 173 (31), 172 (14), 171 (17), 160 (15), 159 (83), 158 (11), 157 (21), 147 (85), 146 (39), 145 (26), 144 (18), 132 (11), 131 (52), 129 (11), 128 (18), 120 (11), 119 (64), 115 (22), 103 (11), 91 (36), 89 (10), 77 (21), 65 (12), 64 (21), 63 (21), 51 (12); HRMS: Calculated for  $\text{C}_{12}\text{H}_{15}\text{NO}_2\text{S}$  ( $\text{M}^+ - \text{C}_4\text{H}_8$ ) 237.0823; found: 237.0831.

**(*S\_S*)-*N*-(*tert*-Butanesulfinyl)-3-methylhexa-1,5-dien-3-amine (3f, 3:2 diastereomeric mixture):**

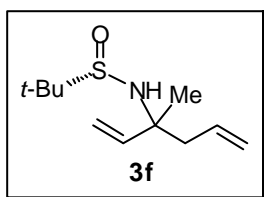

Yellow oil;  $R_f$  0.43 (hexane/EtOAc 1:2); major diastereoisomer  $^1\text{H}$  NMR (300 MHz,  $\text{CDCl}_3$ )  $\delta$  1.20 (s, 9H), 1.36 (s, 3H), 2.27-2.48 (m, 2H), 3.32 (s, 1H), 5.08-5.32 (m, 4H), 5.72-5.89 (m, 1H), 5.96 (dd, 1H,  $J = 17.4, 10.8$  Hz); minor diastereoisomer  $^1\text{H}$  NMR (300 MHz,  $\text{CDCl}_3$ )  $\delta$  1.21 (s, 9H), 1.44 (s, 3H), 2.27-2.48 (m, 2H), 3.35 (s, 1H), 5.08-5.32 (m, 4H), 5.72-5.89 (m, 1H), 5.85 (dd, 1H,  $J = 17.4, 10.7$  Hz); major diastereoisomer  $^{13}\text{C}$  NMR (75 MHz,  $\text{CDCl}_3$ )  $\delta$  22.6, 25.9 ( $\text{CH}_3$ ), 46.3 ( $\text{CH}_2$ ), 55.8 (C), 58.4 (C), 114.0, 119.3 ( $\text{CH}_2$ ), 133.2, 143.8 (CH); minor diastereoisomer  $^{13}\text{C}$  NMR (75 MHz,  $\text{CDCl}_3$ )  $\delta$  22.7, 25.7 ( $\text{CH}_3$ ), 47.1 ( $\text{CH}_2$ ), 55.9 (C), 58.4 (C), 114.1, 119.7 ( $\text{CH}_2$ ), 133.1, 143.5 (CH); IR (film) 3208, 2956, 2359, 2323, 1363, 1052, 996, 915  $\text{cm}^{-1}$ ; MS (EI)  $m/z$  159 ( $\text{M}^+ - 56, 6\%$ ), 141 (13), 118 (33), 117 (16), 116 (100), 110 (16), 102 (12), 101 (14), 100 (71), 99 (34), 96 (11), 95 (91), 94 (29), 93 (16), 91 (16), 79 (44), 77 (33), 74 (14), 73 (16), 70 (12), 68 (12), 67 (38), 65 (11), 64 (21), 59 (38), 58 (15), 57 (63), 56 (79), 55 (48), 54 (25), 53 (45), 51 (17), 50 (15); HRMS: Calculated for  $\text{C}_7\text{H}_{13}\text{NOS}$  ( $\text{M}^+ - \text{C}_4\text{H}_8$ ) 159.0718; found: 159.0720.

**(*S\_S*)-*N*-(*tert*-Butanesulfinyl)-3-ethylhexa-1,5-dien-3-amine (3g):**

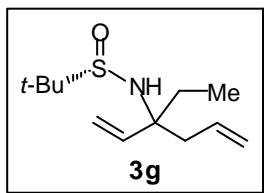

Orange oil;  $[\alpha]_D^{20} +42$  ( $c$  1.03,  $\text{CH}_2\text{Cl}_2$ );  $R_f$  0.55 (hexane/EtOAc 1:2);  $^1\text{H}$  NMR (300 MHz,  $\text{CDCl}_3$ )  $\delta$  0.88 (t, 3H,  $J = 7.4$  Hz), 1.22 (s, 9H), 1.55-1.77 (m, 3H), 2.43-2.54 (m, 2H), 3.41 (s, 1H),

5.12-5.27 (m, 4H), 5.71-5.90 (m, 2H);  $^{13}\text{C}$  NMR (75 MHz,  $\text{CDCl}_3$ )  $\delta$  7.8, 22.8 ( $\text{CH}_3$ ), 31.8, 42.0 ( $\text{CH}_3$ ), 56.1, 61.4 (C), 115.0, 119.3 ( $\text{CH}_2$ ), 133.1, 142.3 (CH); IR (film) 3230, 2962, 2360, 2326, 1637, 1457, 1363, 1052, 996, 915  $\text{cm}^{-1}$ ; MS (EI)  $m/z$  173 ( $\text{M}^+$ -56, 5%), 155 (16), 132 (29), 131 (11), 130 (41), 124 (21), 116 (13), 115 (14), 114 (74), 113 (18), 112 (22), 109 (44), 108 (11), 99 (18), 93 (14), 91 (11), 86 (86), 84 (12), 82 (16), 81 (16), 80 (10), 79 (28), 19 (77), 73 (18), 67 (100), 65 (10), 59 (18), 57 (61), 56 (51), 55 (40), 54 (39), 53 (15); HRMS: Calculated for  $\text{C}_8\text{H}_{15}\text{NOS}$  ( $\text{M}^+$ - $\text{C}_4\text{H}_8$ ) 173.0874; found: 173.0877.

**(*S\_S*)-*N*-(*tert*-Butanesulfinyl)-1-allylcyclopent-2-enamine (3h, 4:1 diastereomeric mixture):**

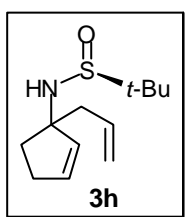

Yellow oil;  $R_f$  0.55 (hexane/EtOAc 1:2); major diastereoisomer  $^1\text{H}$  NMR (300 MHz,  $\text{CDCl}_3$ )  $\delta$  1.18 (s, 9H), 1.92-2.20 (m, 2H), 2.22-2.64 (m, 4H), 3.42 (s, 1H), 5.09-5.20 (m, 2H), 5.71-5.90 (m, 2H), 5.92-5.97 (m, 1H); major diastereoisomer  $^{13}\text{C}$  NMR (75 MHz,  $\text{CDCl}_3$ )  $\delta$  22.6 ( $\text{CH}_3$ ), 31.3, 36.7, 45.5 ( $\text{CH}_2$ ), 55.5 (C), 70.1 (C), 119.0 ( $\text{CH}_2$ ), 133.7 (CH), 133.8 (CH), 135.8 (CH); minor diastereoisomer  $^{13}\text{C}$  NMR (75 MHz,  $\text{CDCl}_3$ )  $\delta$  22.7 ( $\text{CH}_3$ ), 31.5, 36.7, 45.8 ( $\text{CH}_2$ ), 55.7, 70.5 (C), 118.9 ( $\text{CH}_2$ ), 133.7, 134.3, 134.9 (CH); IR (film) 3207, 2953, 2359, 1456, 1362, 1047, 911, 756  $\text{cm}^{-1}$ ; MS (EI)  $m/z$  171 ( $\text{M}^+$ -56, 2%), 107 (52), 106 (55), 105 (34), 104 (20), 103 (26), 91 (100), 79 (54), 78 (65), 77 (40), 65 (15), 63 (24), 57 (20), 56 (23), 55 (10), 53 (11), 52 (11), 51 (21), 50 (12); HRMS: Calculated for  $\text{C}_8\text{H}_{13}\text{NOS}$  ( $\text{M}^+$ - $\text{C}_4\text{H}_8$ ) 171.0718; found: 171.0731.

**(1*S,S\_S*)-*N*-(*tert*-Butanesulfinyl)-1-allylcyclohex-2-enamine (3i):**

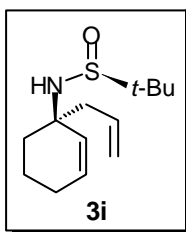

White solid; mp 94-98  $^\circ\text{C}$  ( $\text{CH}_2\text{Cl}_2$ );  $[\alpha]_D^{20}$  +162 ( $c$  0.6,  $\text{CH}_2\text{Cl}_2$ );  $R_f$  0.57 (hexane/EtOAc 1:2);  $^1\text{H}$  NMR (300 MHz,  $\text{CDCl}_3$ )  $\delta$  1.19 (s, 9H), 1.54-2.15 (m, 6H), 2.32-2.52 (m, 2H), 3.42 (br s, 1H), 5.16-5.20 (m, 2H), 5.67-5.74 (m, 1H), 5.74-5.87 (m, 1H), 5.91 (dt, 1H,  $J$  = 10.1, 3.6 Hz);  $^{13}\text{C}$  NMR (75 MHz,  $\text{CDCl}_3$ )  $\delta$  18.4 ( $\text{CH}_2$ ), 22.8 ( $\text{CH}_3$ ), 25.1, 35.6, 46.9 ( $\text{CH}_2$ ), 55.9, 55.9 (C), 119.5 ( $\text{CH}_2$ ), 131.0 (CH), 131.3 (CH), 133.5 (CH); IR (KBr) 3195, 2936, 1362, 1176, 1038, 994, 904  $\text{cm}^{-1}$ ; MS (EI)  $m/z$  200 ( $\text{M}^+$ -41, 3%), 185 (10), 144 (16), 121 (100), 93 (21), 79 (30), 67 (30), 57 (23); HRMS: Calculated for  $\text{C}_9\text{H}_{15}\text{NOS}$  ( $\text{M}^+$ - $\text{C}_4\text{H}_8$ ) 185.0874; found: 185.0885.

**(1*S,S*<sub>8</sub>)-*N*-(*tert*-Butanesulfinyl)-1-allylcyclohept-2-enamine (3j):**

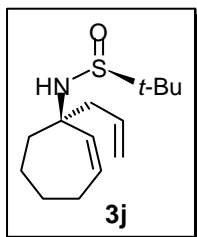

White solid; mp 90-96 °C (CH<sub>2</sub>Cl<sub>2</sub>);  $[\alpha]_D^{20} +80$  (*c* 1.2, CH<sub>2</sub>Cl<sub>2</sub>); *R<sub>f</sub>* 0.61 (hexane/EtOAc 1:2); <sup>1</sup>H NMR (300 MHz, CDCl<sub>3</sub>) δ 1.20 (s, 9H), 1.50-1.77 (m, 4H), 1.79-1.92 (m, 2H), 2.12-2.19 (m, 2H), 2.40-2.56 (m, 2H), 3.41 (s, 1H), 5.13-5.20 (m, 2H), 5.69-5.91 (m, 3H); <sup>13</sup>C NMR (75 MHz, CDCl<sub>3</sub>) δ 22.8 (CH<sub>3</sub>), 24.1, 27.2, 28.0, 38.4, 47.0 (CH<sub>2</sub>), 55.8, 61.6 (C), 119.5 (CH<sub>2</sub>), 132.9, 133.5, 136.1 (CH); IR (KBr) 3191, 2928, 1639, 1065, 1034, 994, 952, 904, 679 cm<sup>-1</sup>; MS (EI) *m/z* 199 (M<sup>+</sup>-41, 29%), 183 (12), 181 (15), 166 (15), 158 (24), 157 (52), 152 (10), 151 (14), 150 (21), 149 (11), 148 (14), 140 (15), 136 (17), 135 (74), 134 (34), 121 (11), 120 (13), 119 (18), 117 (12), 115 (11), 109 (24), 108 (24), 107 (31), 106 (24), 105 (33), 94 (41), 93 (81), 92 (26), 91 (100), 81 (48), 80 (34), 79 (73), 78 (21), 77 (56), 73 (10), 69 (10), 68 (18), 67 (49), 66 (14), 65 (25), 63 (10), 59 (11), 57 (47), 56 (20), 55 (28), 54 (17), 53 (29), 51 (17); HRMS: Calculated for C<sub>10</sub>H<sub>17</sub>NOS (M<sup>+</sup>-C<sub>4</sub>H<sub>8</sub>) 199.1031; found: 199.1034.

**(3*S,S*<sub>8</sub>)-*N*-(*tert*-Butanesulfinyl)-3-methylhex-5-en-3-amine (3k):**

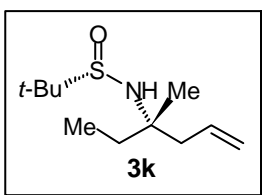

Colourless oil;  $[\alpha]_D^{20} +52$  (*c* 0.77, CH<sub>2</sub>Cl<sub>2</sub>); *R<sub>f</sub>* 0.56 (hexane/EtOAc 1:2); <sup>1</sup>H NMR (300 MHz, CDCl<sub>3</sub>) δ 0.89 (t, 3H, *J* = 7.5 Hz), 1.20 (s, 9H), 1.26 (s, 3H), 1.56 (q, 2H, *J* = 7.4 Hz), 2.30-2.34 (m, 2H), 3.20 (s, 1H), 5.11-5.17 (m, 2H), 5.76-5.91 (m, 1H); <sup>13</sup>C NMR (75 MHz, CDCl<sub>3</sub>) δ 7.9, 22.7, 25.6 (CH<sub>3</sub>), 33.4, 45.7 (CH<sub>2</sub>), 55.7, 57.5 (C), 119.2 (CH<sub>2</sub>), 133.5 (CH); IR (film) 3179, 2962, 2915, 1641, 1456, 1362, 1183, 1157, 1035, 1001, 938, 922, 903, 675 cm<sup>-1</sup>; MS (EI) *m/z* 161 (M<sup>+</sup>-56, 31%), 161 (31), 160 (14), 143 (12), 120 (88), 119 (40), 110 (18), 104 (40), 97 (62), 96 (23), 81 (13), 74 (36), 73 (26), 72 (11), 71 (13), 70 (10), 69 (10), 57 (68), 56 (25), 55 (100); HRMS: Calculated for C<sub>7</sub>H<sub>15</sub>NOS (M<sup>+</sup>-C<sub>4</sub>H<sub>8</sub>) 161.0874; found: 161.0868.

**(3*R,S*<sub>8</sub>)-*N*-(*tert*-Butanesulfinyl)-2,3-dimethylhex-5-en-3-amine (3l):**

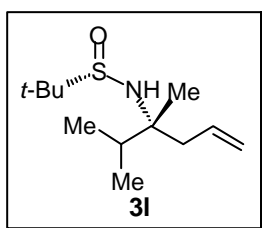

Yellow oil;  $[\alpha]_D^{20} +50$  (*c* 0.99, CH<sub>2</sub>Cl<sub>2</sub>); *R<sub>f</sub>* 0.62 (hexane/EtOAc 1:2); <sup>1</sup>H NMR (300 MHz, CDCl<sub>3</sub>) δ 0.91 (t, 6H, *J* = 6.6 Hz), 1.21 (s, 9H), 1.24 (s, 3H), 1.71-1.82 (m, 1H), 2.34-2.47 (m, 2H), 3.29 (s, 1H), 5.16-5.21 (m, 2H), 5.78-5.92 (m, 1H); <sup>13</sup>C NMR (75 MHz, CDCl<sub>3</sub>) δ 16.9, 17.0, 21.7, 22.8 (CH<sub>3</sub>), 35.6 (CH), 44.2 (CH<sub>2</sub>), 56.0, 59.9 (C), 119.6 (CH<sub>2</sub>), 133.4 (CH); IR (film) 3240, 2959, 2874, 2360,

1638, 1457, 1388, 1457, 1164, 1045, 910  $\text{cm}^{-1}$ ; MS (EI)  $m/z$  175 ( $M^+$ -56, 26%), 190 (12), 134 (93), 133 (28), 132 (41), 118 (17), 116 (26), 111 (31), 110 (30), 95 (15), 84 (10), 74 (24), 73 (21), 70 (22), 69 (100), 57 (72), 55 (40); HRMS: Calculated for  $\text{C}_8\text{H}_{17}\text{NOS}$  ( $M^+$ - $\text{C}_4\text{H}_8$ ) 175.1031; found: 175.1029.

**(4*S*,*S*<sub>8</sub>)-*N*-(*tert*-Butanesulfinyl)-4-methylnon-1-en-4-amine (3m):**

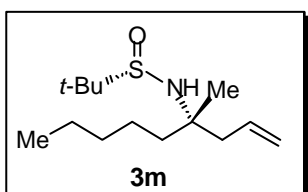

Yellow oil;  $[\alpha]_D^{20}$  +53 ( $c$  0.96,  $\text{CH}_2\text{Cl}_2$ );  $R_f$  0.58 (hexane/EtOAc 1:2);  $^1\text{H}$  NMR (300 MHz,  $\text{CDCl}_3$ )  $\delta$  0.89 (3H, t,  $J$  = 6.7 Hz,  $\text{CH}_3$ ), 1.19 (s, 9H), 1.21-1.39 (m, 6H), 1.27 (s, 3H), 1.45-1.54 (m, 2H), 2.25-2.38 (m, 2H), 3.19 (s, 1H), 5.08-5.18 (m, 2H), 5.76-5.89 (m, 1H);  $^{13}\text{C}$  NMR (75 MHz,  $\text{CDCl}_3$ )  $\delta$  14.0 ( $\text{CH}_3$ ), 22.6 ( $\text{CH}_2$ ), 22.7 ( $\text{CH}_3$ ), 23.0 ( $\text{CH}_2$ ), 26.2 ( $\text{CH}_3$ ), 32.2, 40.9, 46.1 ( $\text{CH}_2$ ), 55.7, 57.4 (C), 119.2 ( $\text{CH}_2$ ), 133.6 (CH); IR (film) 3217, 2932, 2863, 1457, 1362, 1053, 912  $\text{cm}^{-1}$ ; MS (EI)  $m/z$  203 ( $M^+$ -56, 22%), 163 (10), 162 (100), 161 (33), 146 (19), 138 (10), 132 (18), 114 (11), 97 (45), 96 (19), 83 (70), 82 (16), 74 (23), 73 (18), 70 (11), 69 (35), 57 (63), 56 (11), 55 (39); HRMS: Calculated for  $\text{C}_{10}\text{H}_{21}\text{NOS}$  ( $M^+$ - $\text{C}_4\text{H}_8$ ) 203.1344; found: 203.1341.

**(4*S*,*S*<sub>8</sub>)-*N*-(*tert*-Butanesulfinyl)-2,4-dimethylnon-1-en-4-amine (3n):**

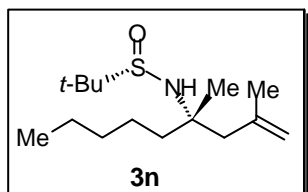

Colourless oil;  $[\alpha]_D^{20}$  +58 ( $c$  1.0,  $\text{CH}_2\text{Cl}_2$ );  $R_f$  0.66 (hexane/EtOAc 1:2);  $^1\text{H}$  NMR (300 MHz,  $\text{CDCl}_3$ )  $\delta$  0.89 (t, 3H,  $J$  = 6.8 Hz), 1.20 (s, 9H), 1.22-1.40 (m, 8H), 1.34 (s, 3H), 1.47-1.59 (m, 2H), 1.82 (s, 3H), 2.28 (s, 2H), 3.46 (s, 1H), 4.82-4.86 (m, 1H), 4.96-5.00 (m, 1H);  $^{13}\text{C}$  NMR (75 MHz,  $\text{CDCl}_3$ )  $\delta$  14.2 ( $\text{CH}_3$ ), 22.8 ( $\text{CH}_2$ ), 22.9 ( $\text{CH}_3$ ), 23.4 ( $\text{CH}_2$ ), 25.5, 27.2 ( $\text{CH}_3$ ), 32.4, 41.4, 49.7 ( $\text{CH}_2$ ), 55.9, 57.5 (C), 116.5 ( $\text{CH}_2$ ), 142.1 (C); IR (film) 3217, 2933, 2863, 1457, 1377, 1052, 930, 892  $\text{cm}^{-1}$ ; MS (EI)  $m/z$  218 ( $M^+$ -55, 8%), 202 (12), 162 (56), 161 (100), 146 (37), 144 (15), 130 (24), 114 (22), 110 (30), 105 (20), 97 (45), 96 (32), 95 (13), 89 (21), 87 (41), 85 (11), 83 (21), 81 (11), 74 (37), 70 (19), 69 (26), 59 (13), 58 (11), 57 (85), 56 (32), 55 (71), 53 (18); HRMS: Calculated for  $\text{C}_{11}\text{H}_{23}\text{NOS}$  ( $M^+$ - $\text{C}_4\text{H}_8$ ) 217.1500; found: 217.1498.

**(4*R*,*R*<sub>S</sub>)-*N*-(*tert*-Butanesulfinyl)-4-methylnon-1-en-4-amine (*ent*-3*m*):**

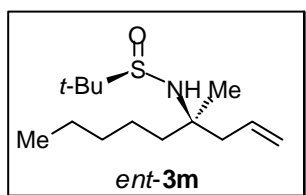

Physical and spectroscopic data were found to be same than for **3m**.  $[\alpha]_D^{20}$  -50 (*c* 1.03, CH<sub>2</sub>Cl<sub>2</sub>).

**General procedure for the stereoselective allylation of *N*-*tert*-butanesulfinyl ketimines **1**:**

To a stirred solution of the corresponding *N*-*tert*-butanesulfinyl amine **3** (0.33 mmol) in THF (0.5 mL) was added a 6M HCl aqueous solution (0.39 mL) at 23 °C. After 1 h stirring at this temperature, the resulting mixture was basified with a 1M NaOH aqueous solution. The reaction mixture was extracted with EtOAc (2 × 10 mL), the organic layer was washed first with 1M NaOH aqueous solution (5 mL) and then with H<sub>2</sub>O (5 mL), dried over anhydrous MgSO<sub>4</sub> and evaporated (15 Torr) to yield the corresponding amines **4**. Yields are given on Figure 3. Physical and spectroscopic data follow.

**Characterization data of the obtained amines **4****

**(*S*)-4-Allylchroman-4-amine (**4e**):**

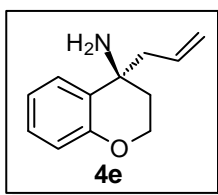

Yellow oil;  $[\alpha]_D^{20}$  +9 (*c* 1.14, CH<sub>2</sub>Cl<sub>2</sub>); *R*<sub>f</sub> 0.40 (CH<sub>2</sub>Cl<sub>2</sub>/MeOH 9:1); <sup>1</sup>H NMR (300 MHz, CDCl<sub>3</sub>) δ 1.68 (br s, 2H), 1.81 (ddd, 1H, *J* = 14.0, 6.4, 4.2 Hz), 2.13 (ddd, 1H, *J* = 14.0, 7.0, 4.5 Hz), 2.56 (d, 2H, *J* = 7.2 Hz), 4.21-4.27 (m, 2H), 5.10-5.15 (m, 1H), 5.15-5.20 (m, 1H), 5.66-5.85 (m, 1H), 6.81 (dd, 1H, *J* = 8.2, 1.2 Hz), 6.89-6.95 (m, 1H), 7.13 (ddd, 1H, *J* = 8.2, 7.2, 1.7 Hz), 7.40 (dd, 1H, *J* = 7.8, 1.7 Hz); <sup>13</sup>C NMR (75 MHz, CDCl<sub>3</sub>) δ 36.1, 47.4 (CH<sub>2</sub>), 49.5 (C), 63.0 (CH<sub>2</sub>), 117.1 (CH), 119.2 (CH<sub>2</sub>), 120.6, 126.6, 128.2, 133.5 (CH), 153.9 (C); IR (film) 3208, 2956, 2359, 2323, 1363, 1052, 996, 915 cm<sup>-1</sup>; MS (EI) *m/z* 189 (M<sup>+</sup>, 1%), 159 (100); HRMS: Calculated for C<sub>12</sub>H<sub>15</sub>NOS 189.1154; found: 189.1155.

**(S)-4-Methylnon-1-en-4-amine (4m):**

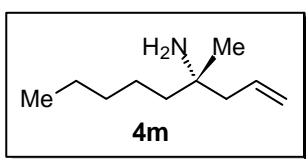

Yellow oil;  $[\alpha]_D^{20}$  -0.5 (*c* 0.84, CH<sub>2</sub>Cl<sub>2</sub>); *R<sub>f</sub>* 0.28 (CH<sub>2</sub>Cl<sub>2</sub>/MeOH 9:1); <sup>1</sup>H NMR (300 MHz, CDCl<sub>3</sub>) δ 0.89 (t, 3H, *J* = 6.8 Hz), 1.07 (s, 3H), 1.18-1.41 (m, 8H), 2.13 (d, 2H, *J* = 7.5 Hz), 4.89-5.18 (m, 2H), 5.69-5.97 (m, 1H); <sup>13</sup>C NMR (75 MHz, CDCl<sub>3</sub>) δ 14.1 (CH<sub>3</sub>), 22.6, 23.5 (CH<sub>2</sub>), 27.4 (CH<sub>3</sub>), 32.4, 42.4, 46.9 (CH<sub>2</sub>), 51.9 (C), 118.2 (CH<sub>2</sub>), 134.3 (CH); IR (film) 3354, 3279, 2927, 1639, 1458, 1377, 911 cm<sup>-1</sup>; MS (EI) *m/z* 155 (M<sup>+</sup>, 1%), 114 (100); HRMS: Calculated for C<sub>10</sub>H<sub>21</sub>N 155.1674; found: 155.1663.



### X-Ray structures of compounds **3i** and **3j**

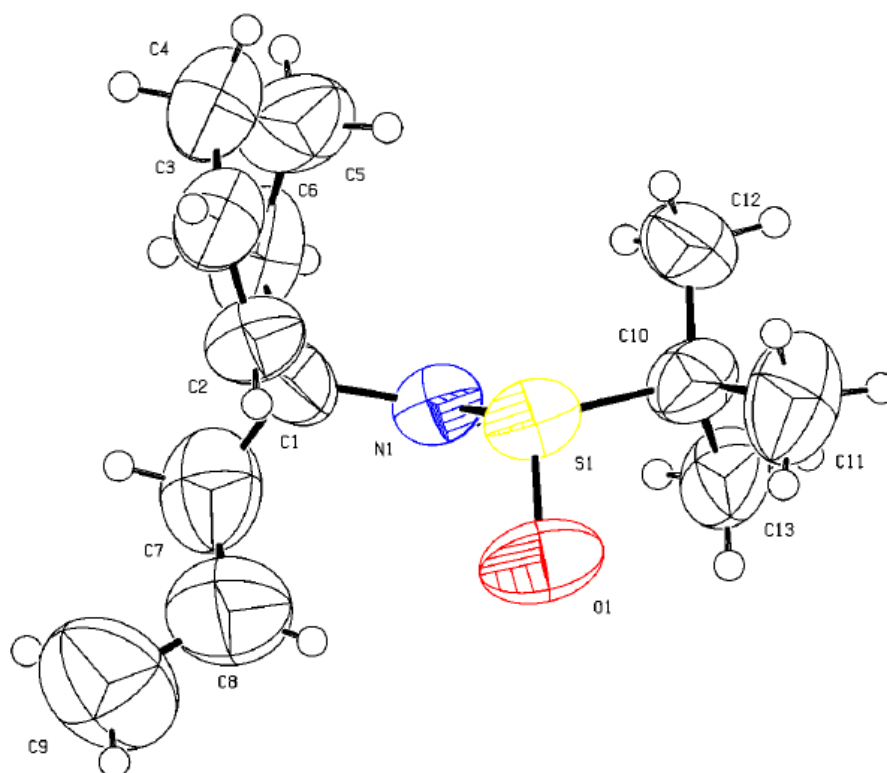

Figure 1. Molecular Structure for Product **3i** as Determined by X-ray Analysis

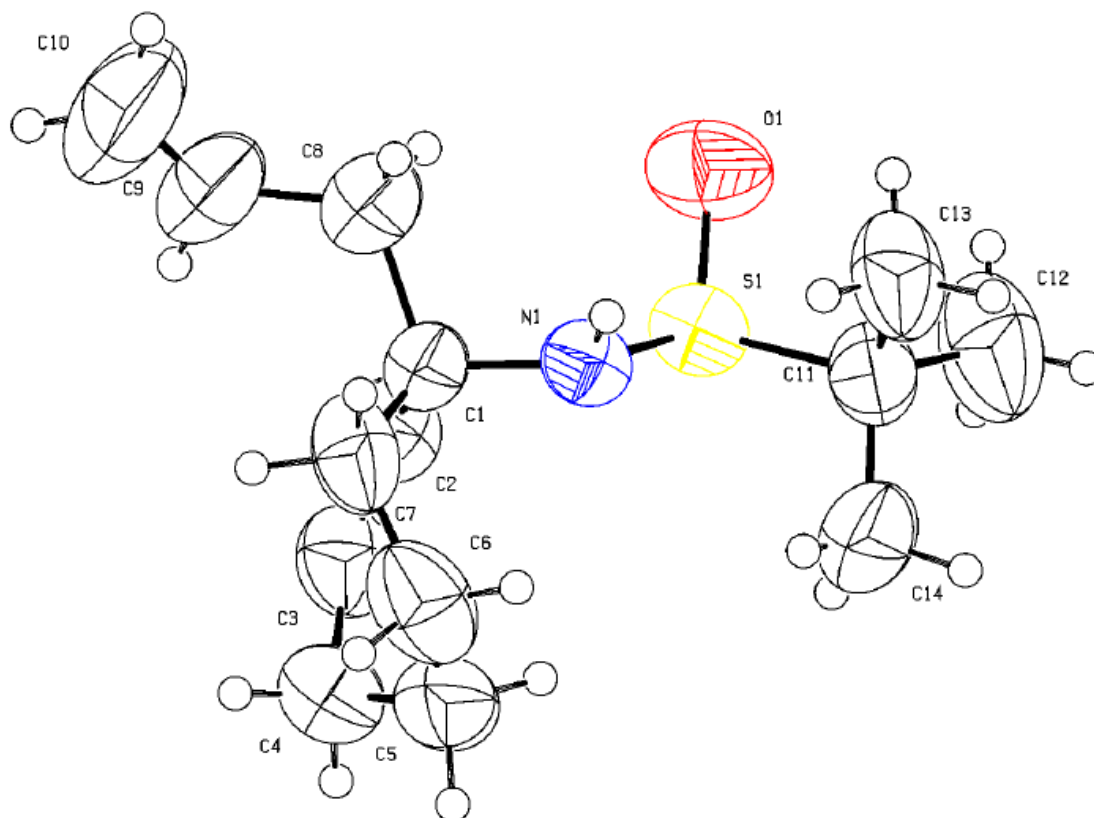

Figure 2. Molecular Structure for Product **3j** as Determined by X-ray Analysis

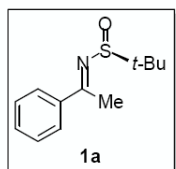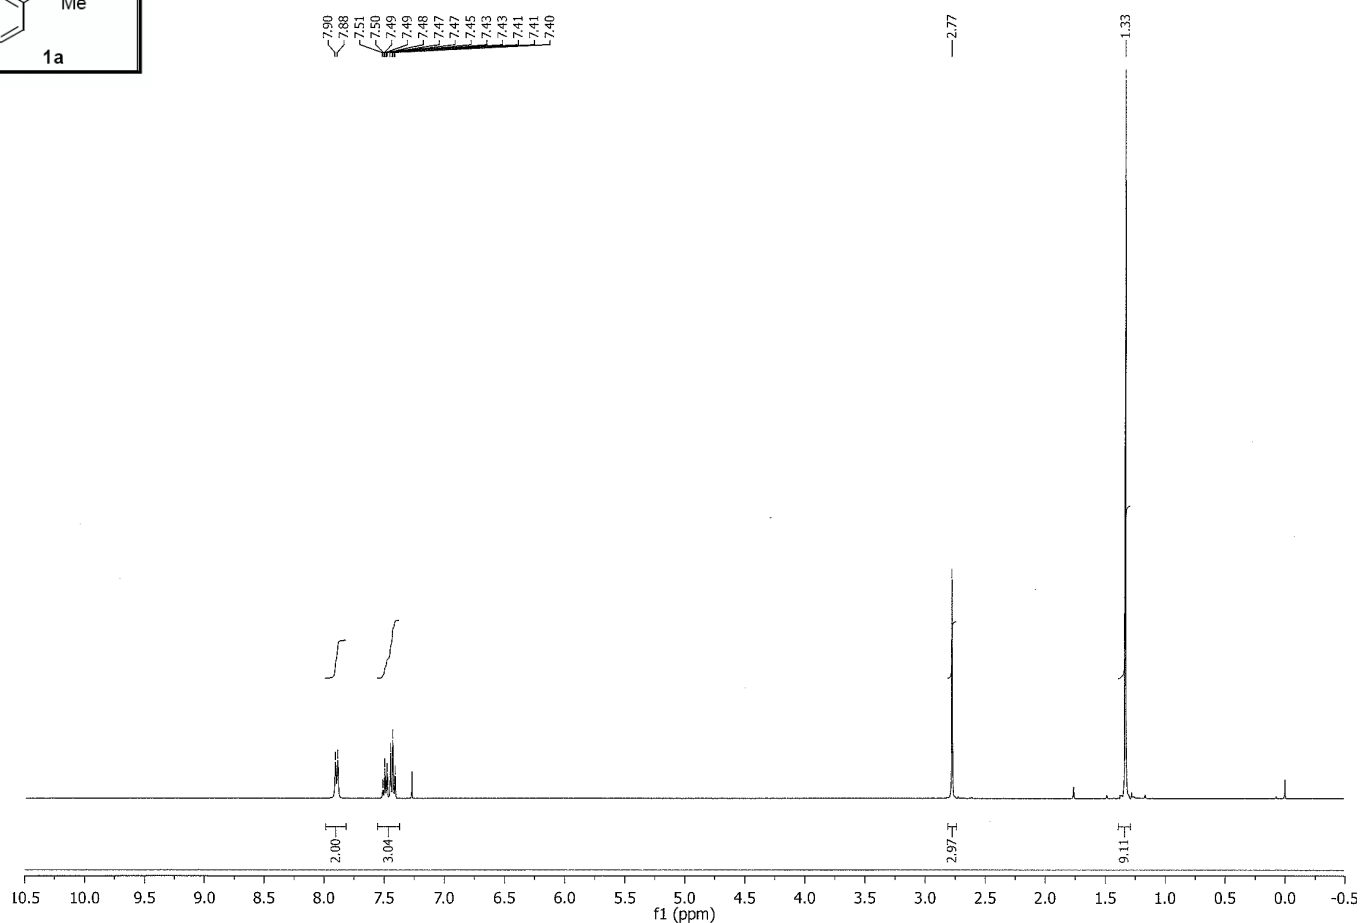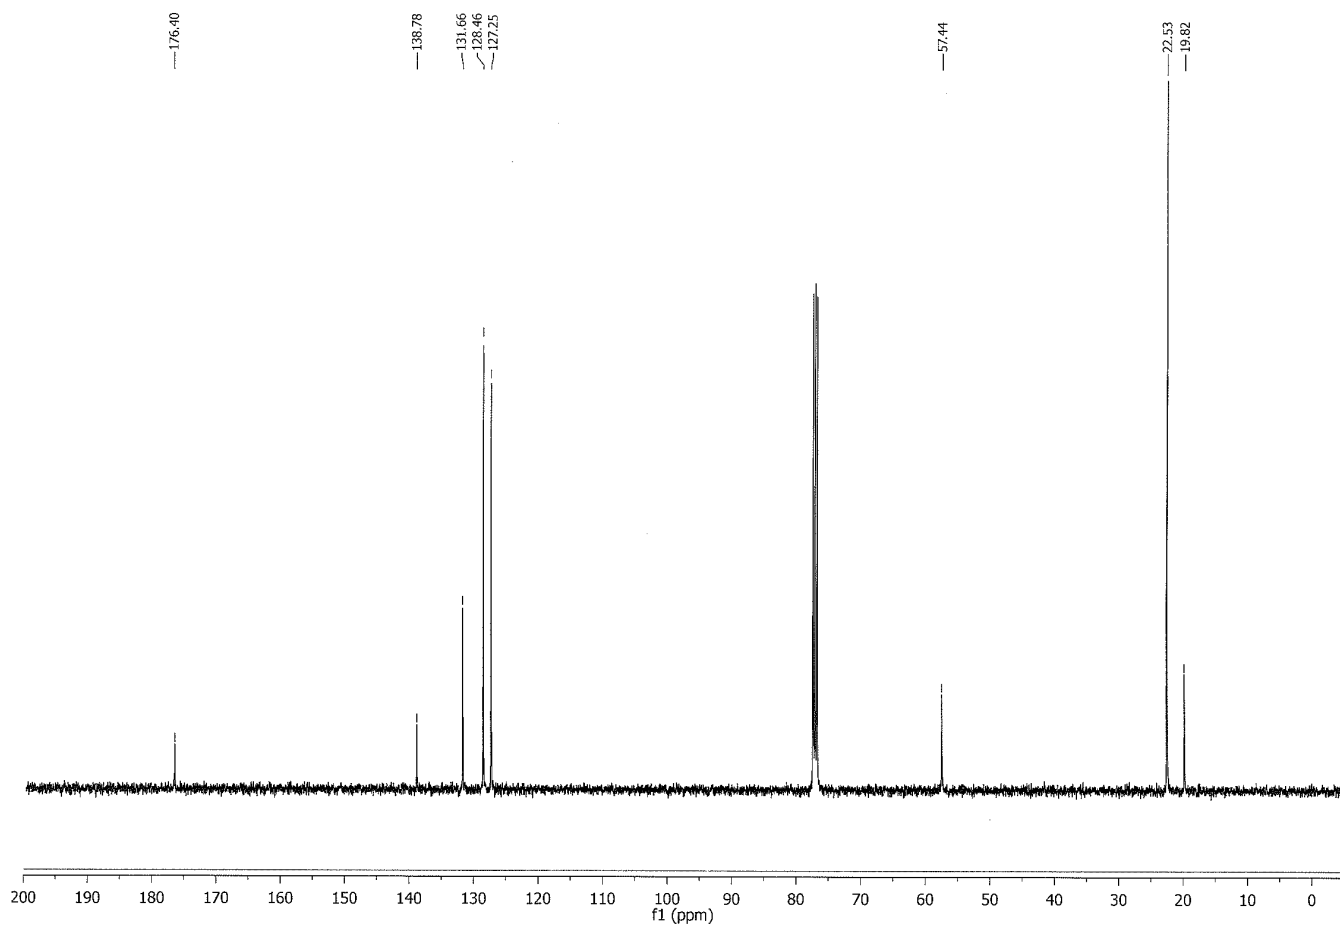

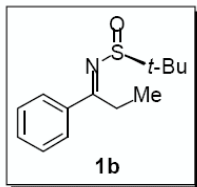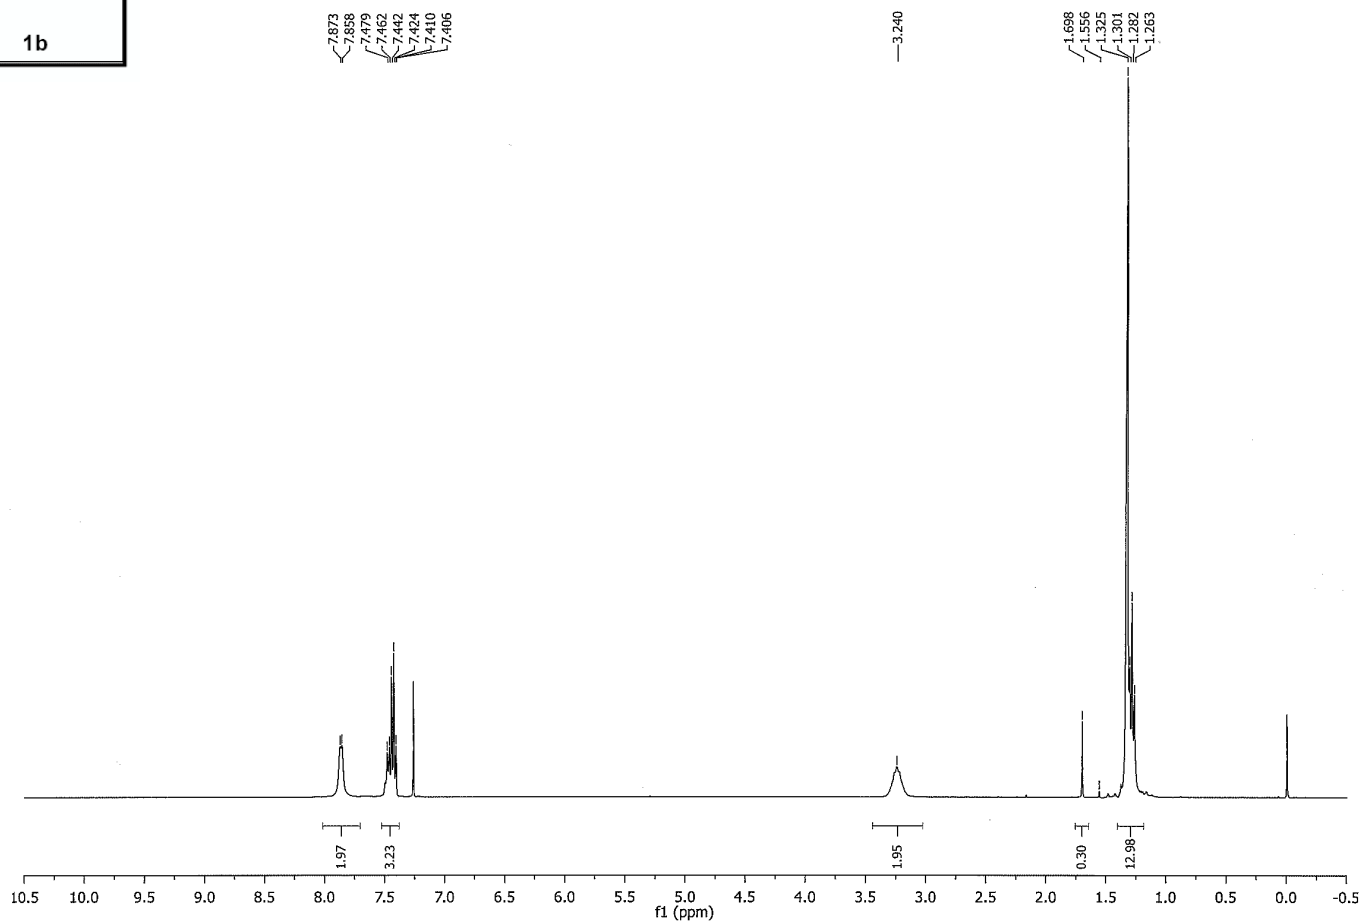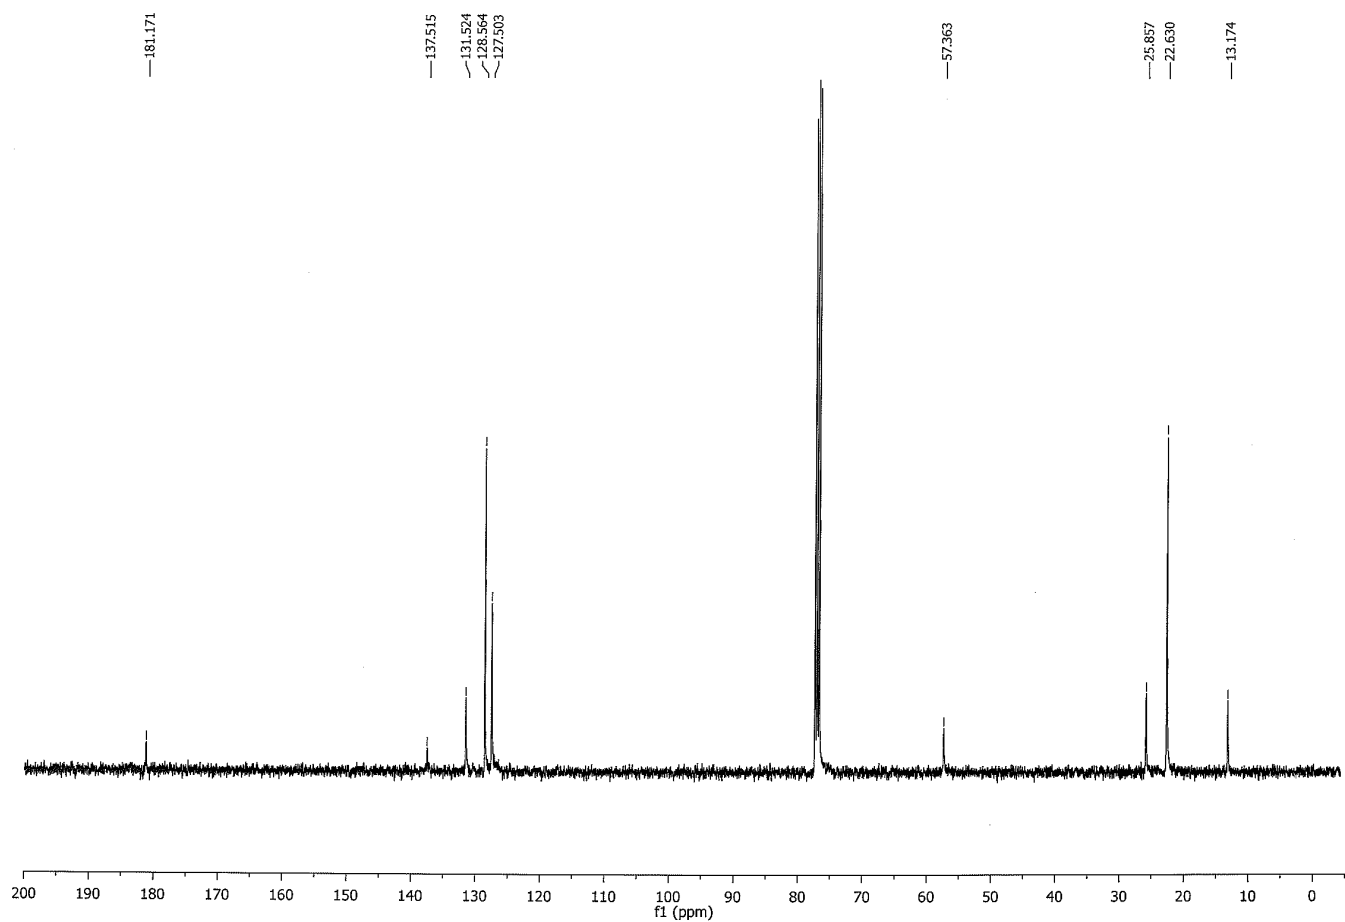

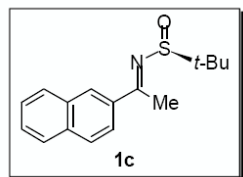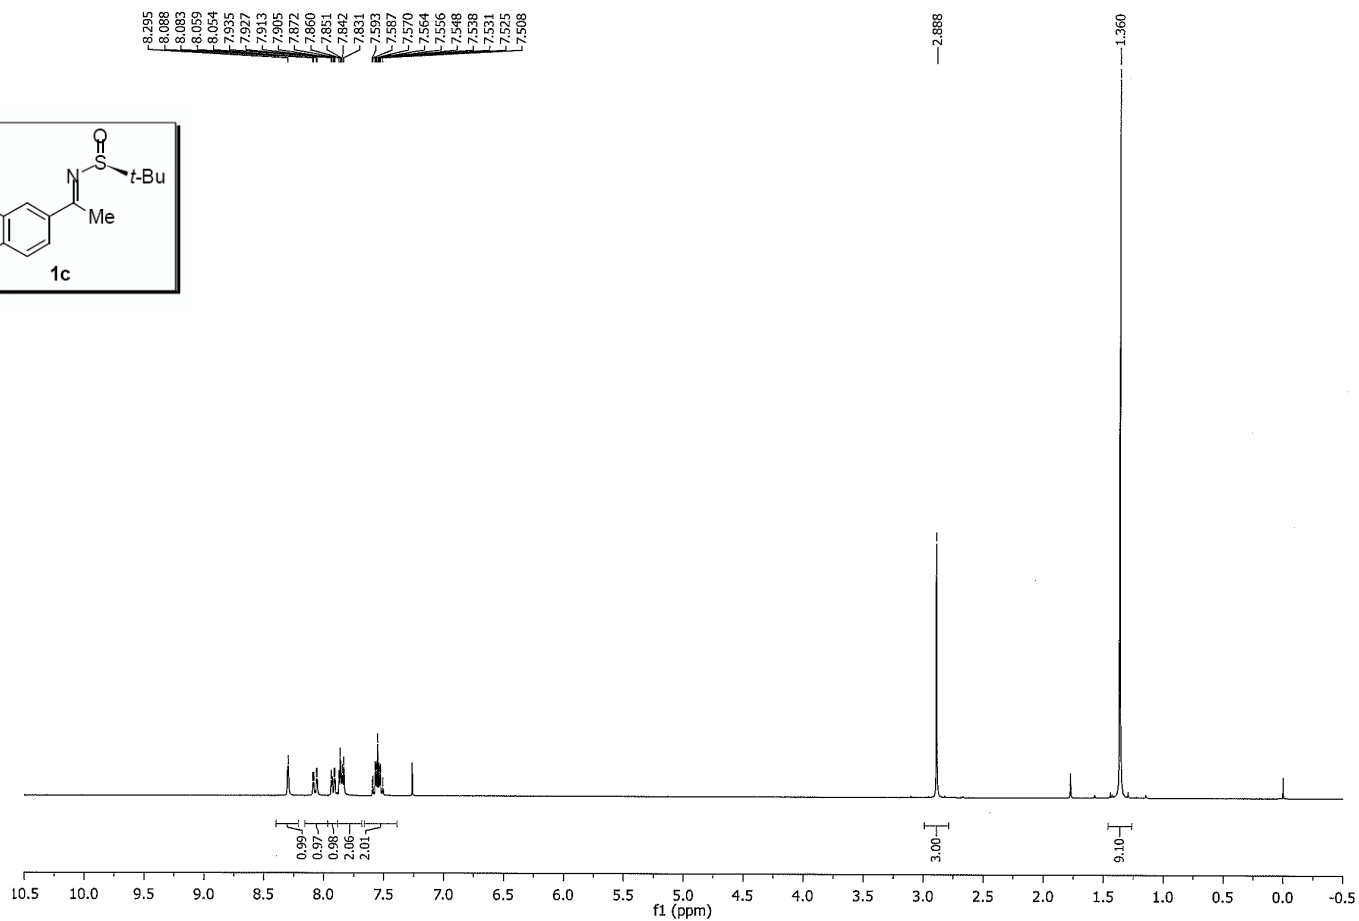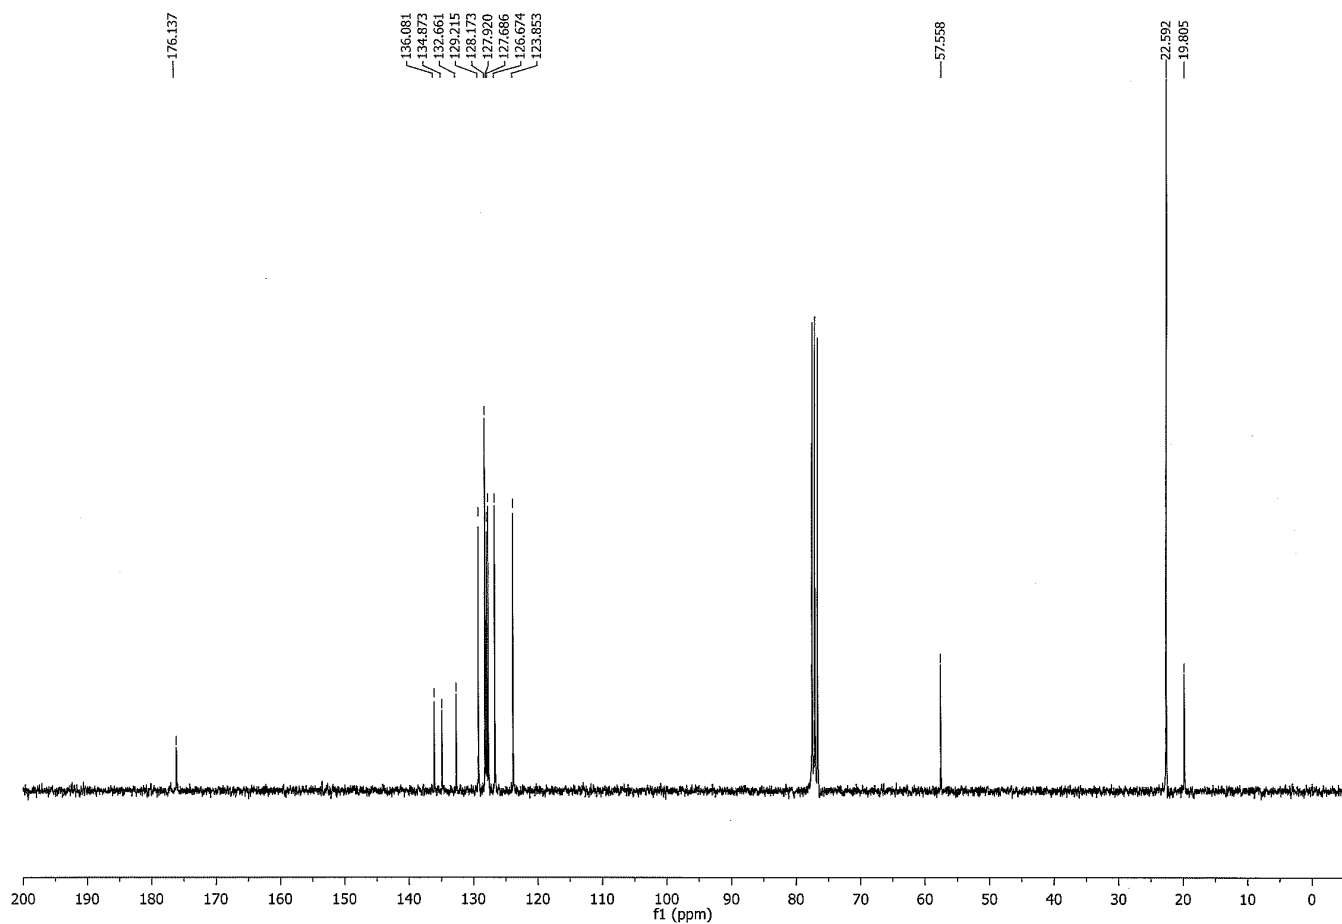

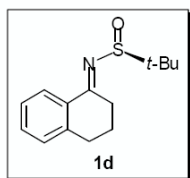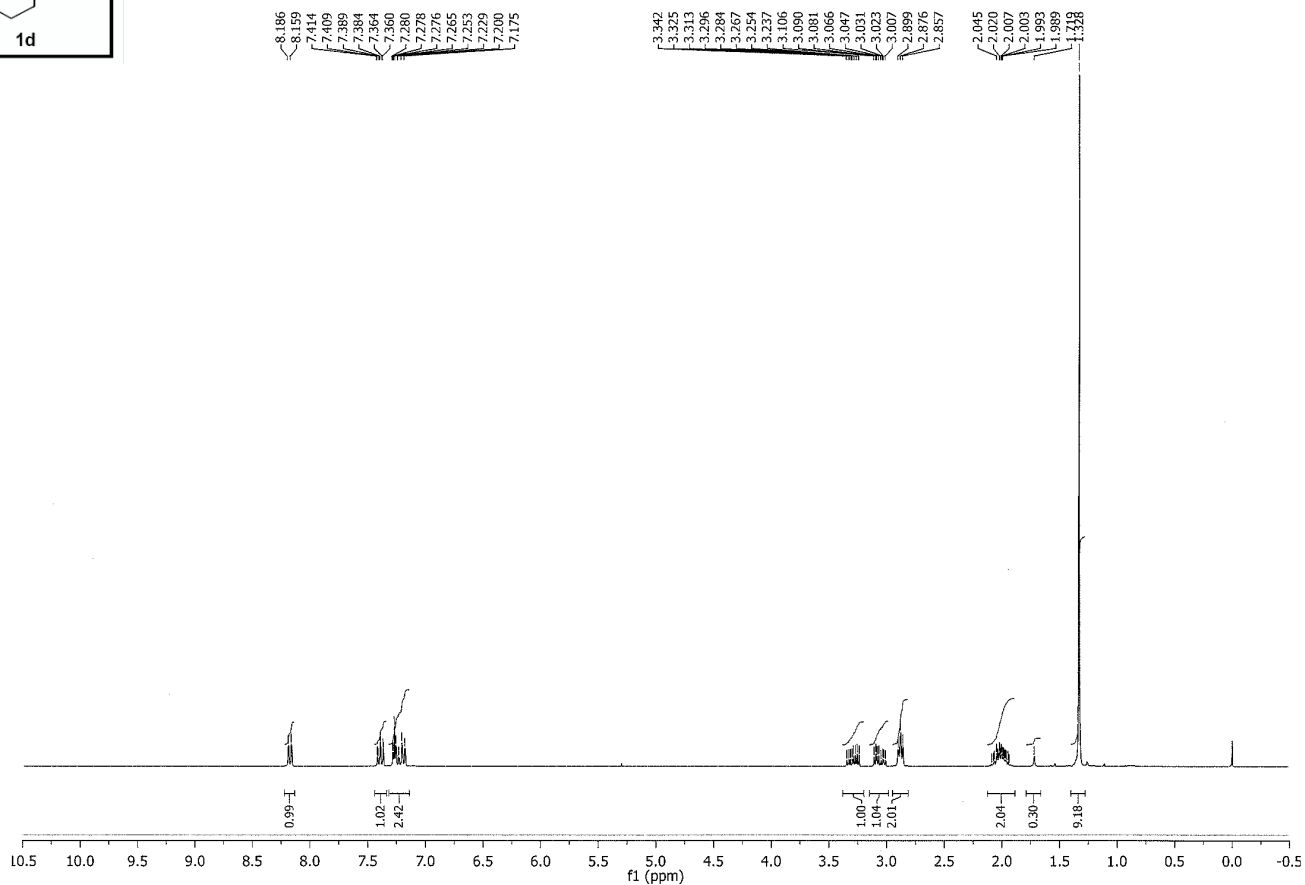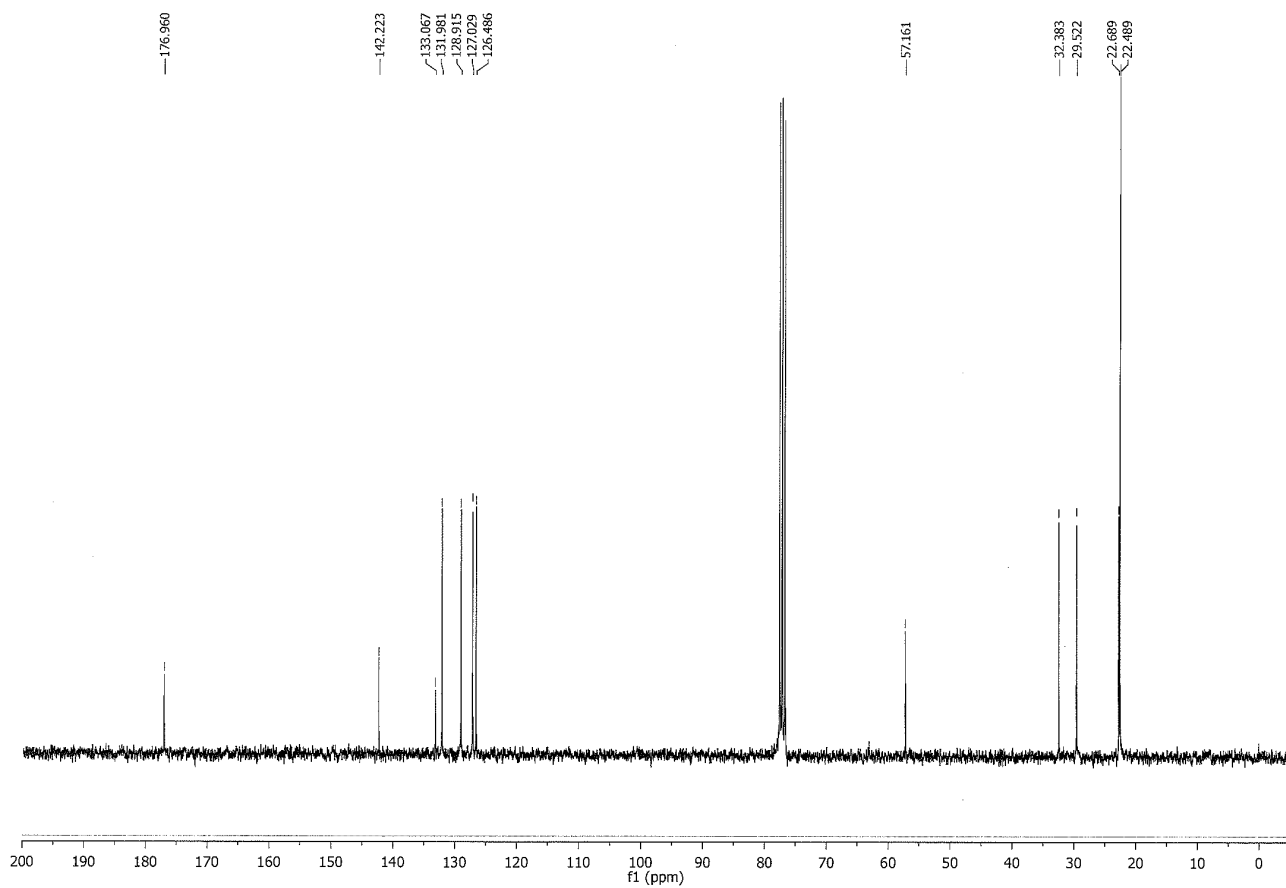

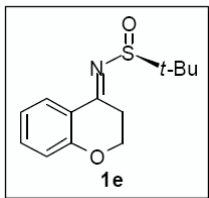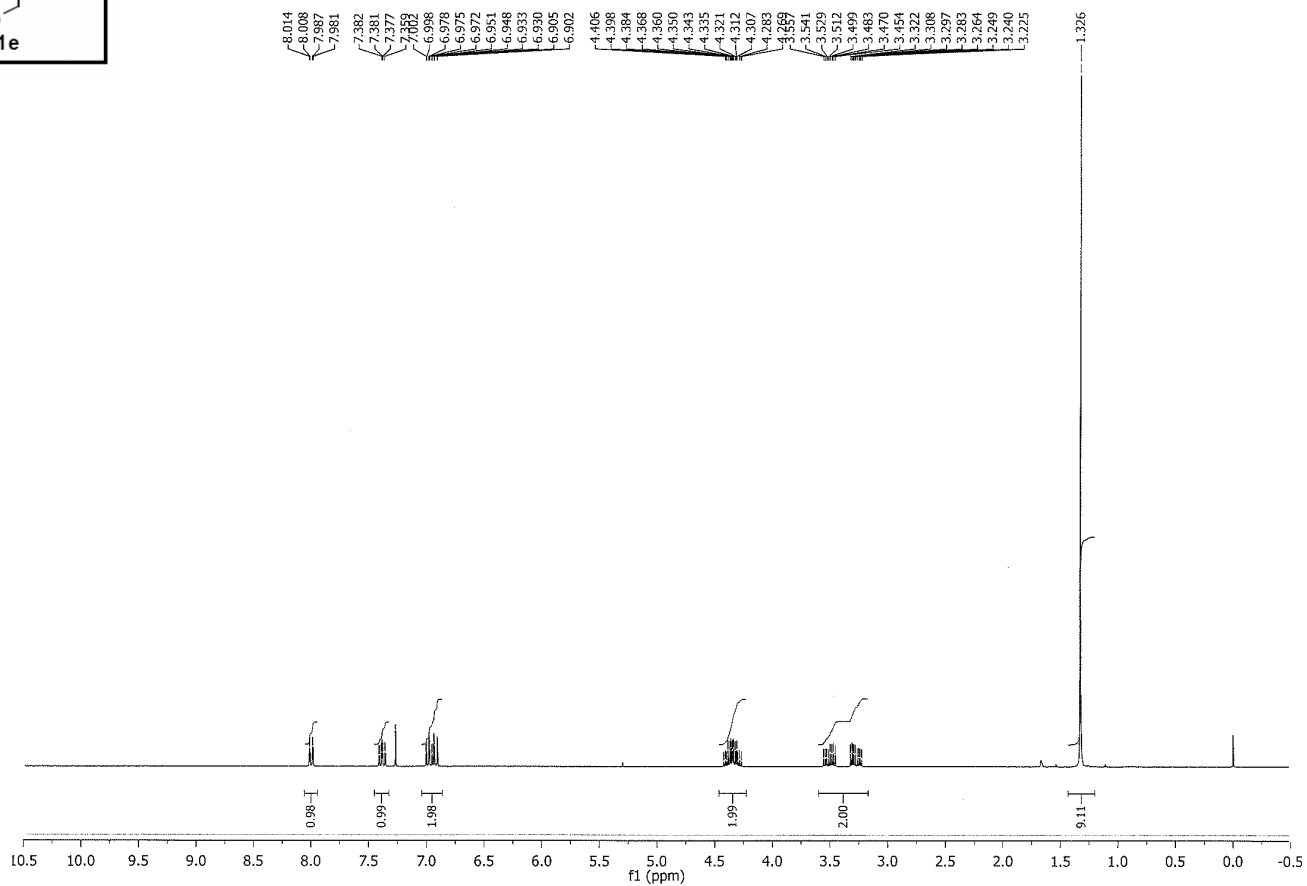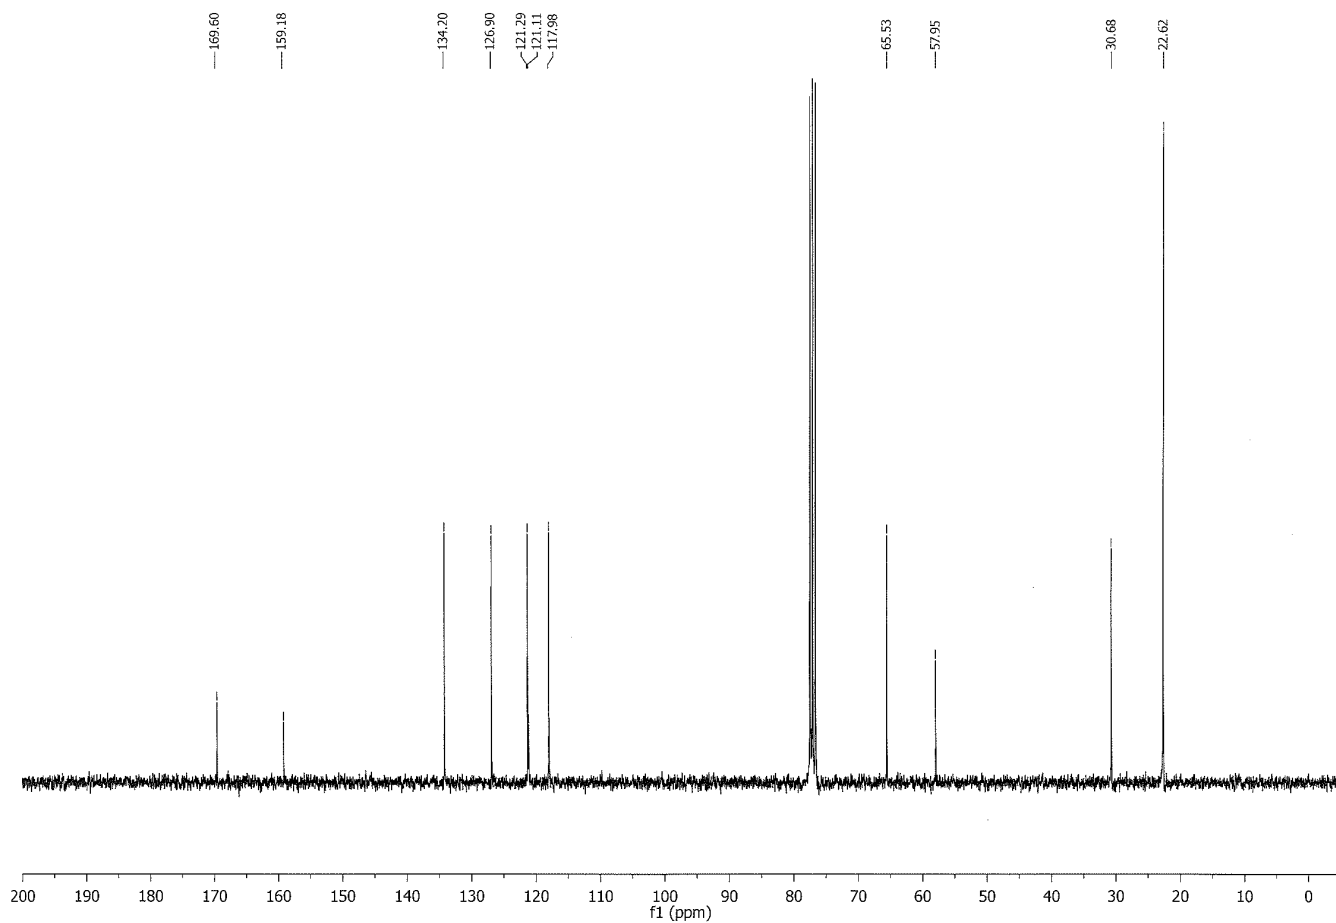

(3:1 diastereomeric mixture)

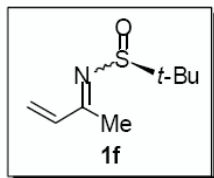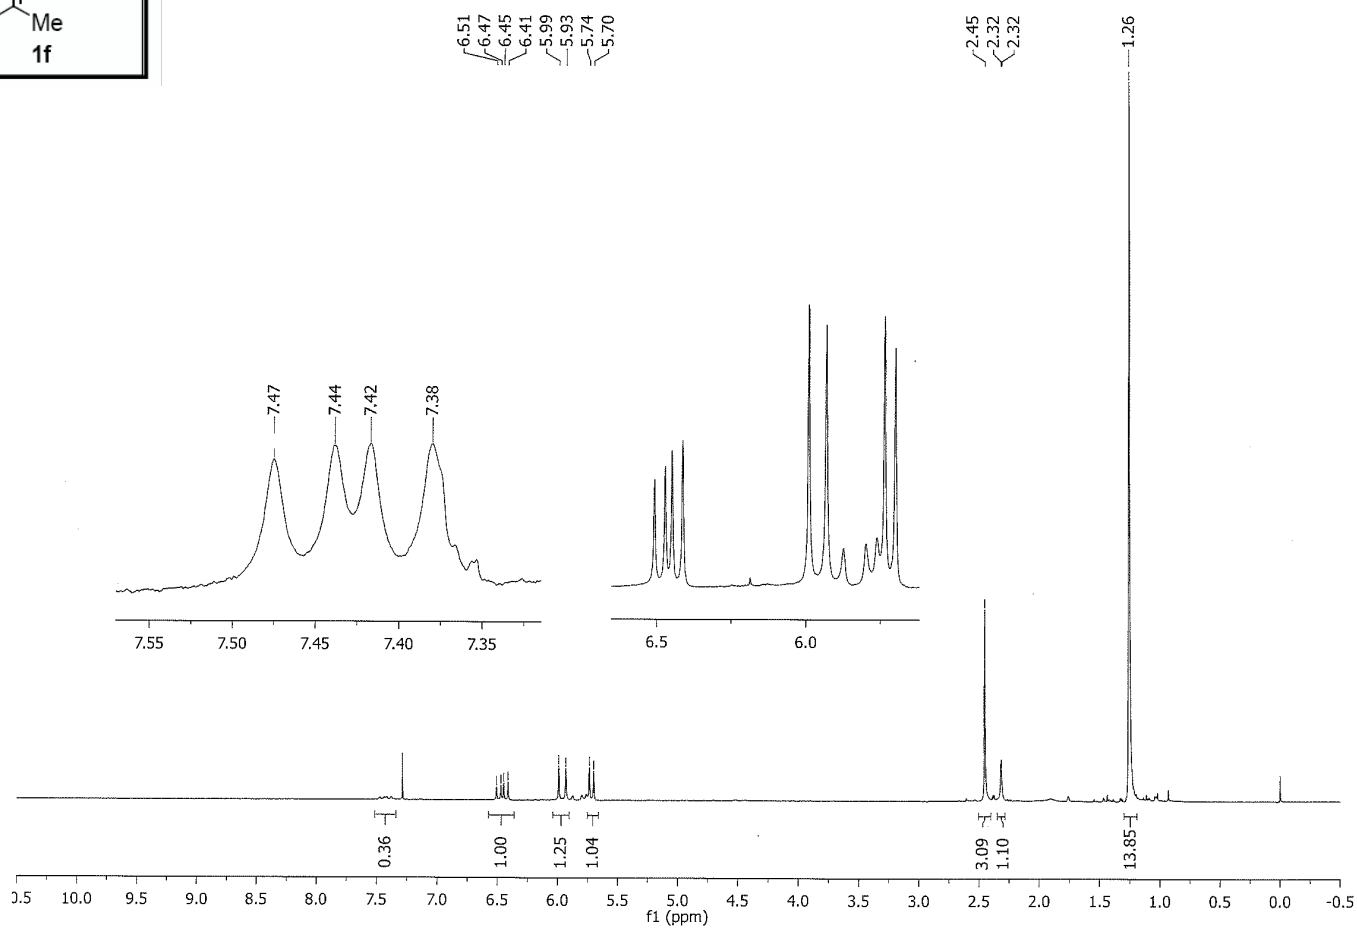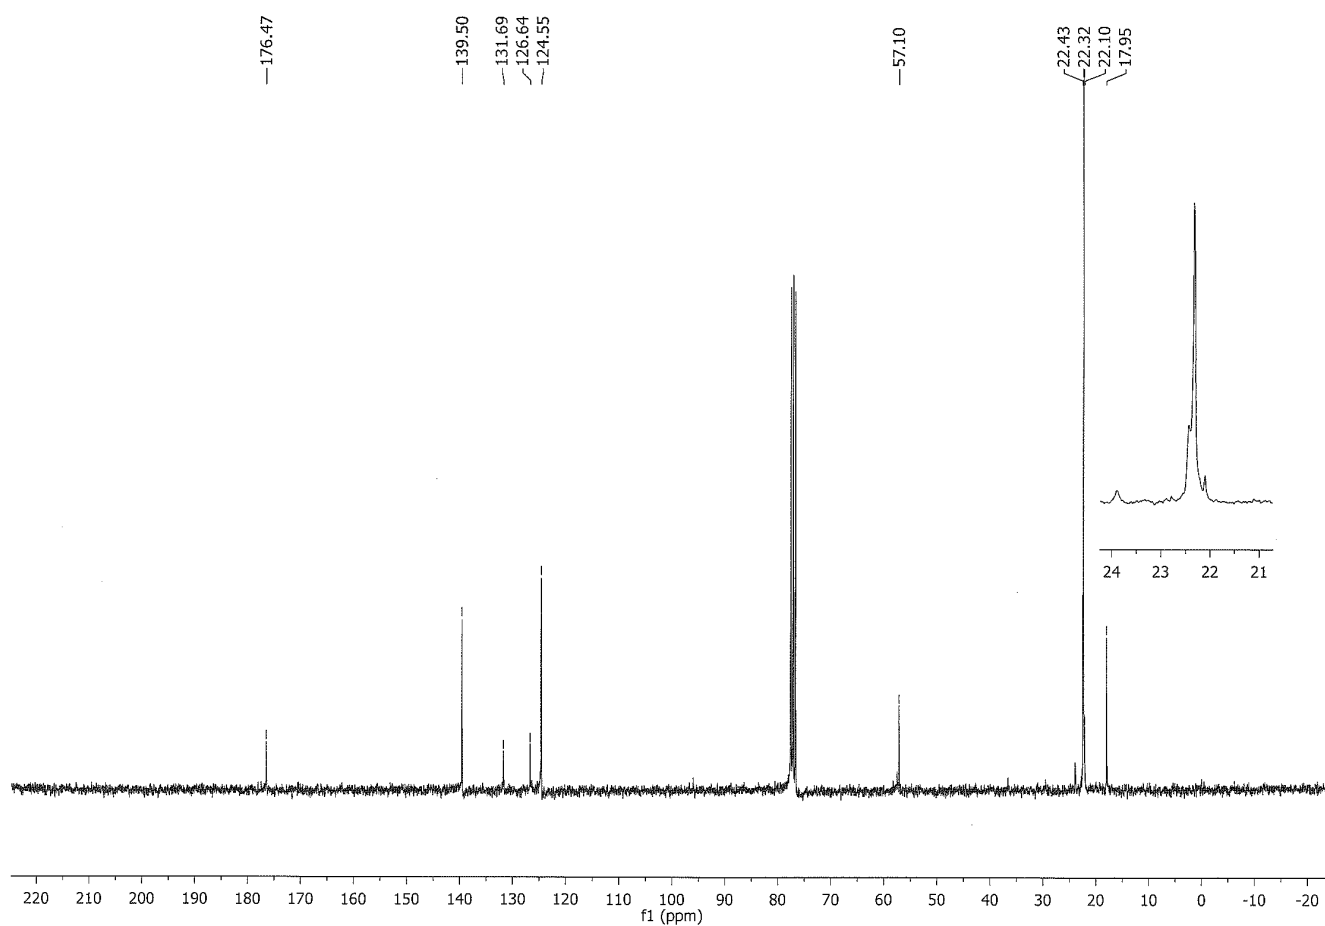

(63:37 diastereomeric mixture)

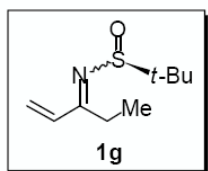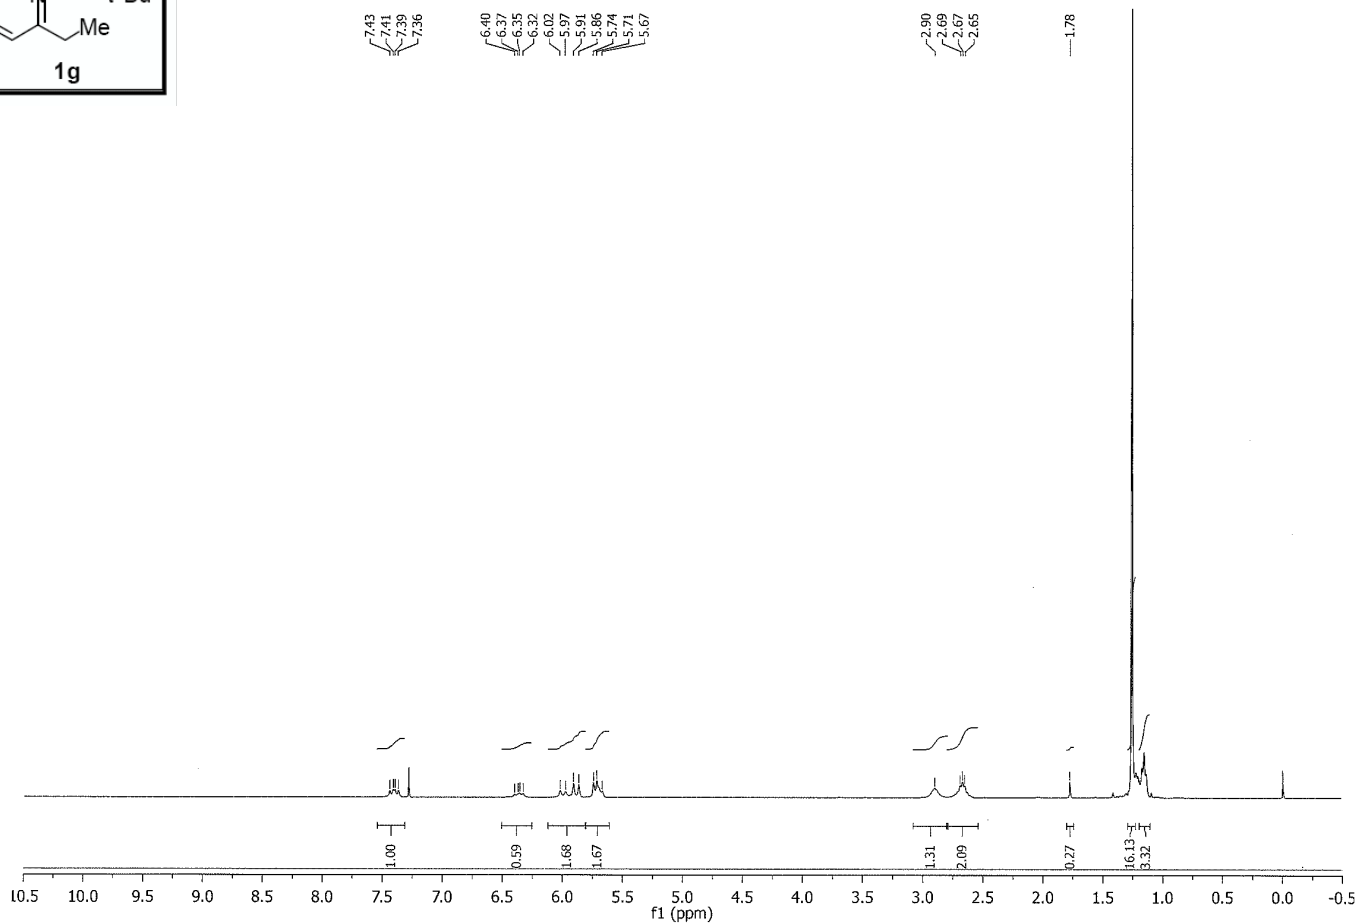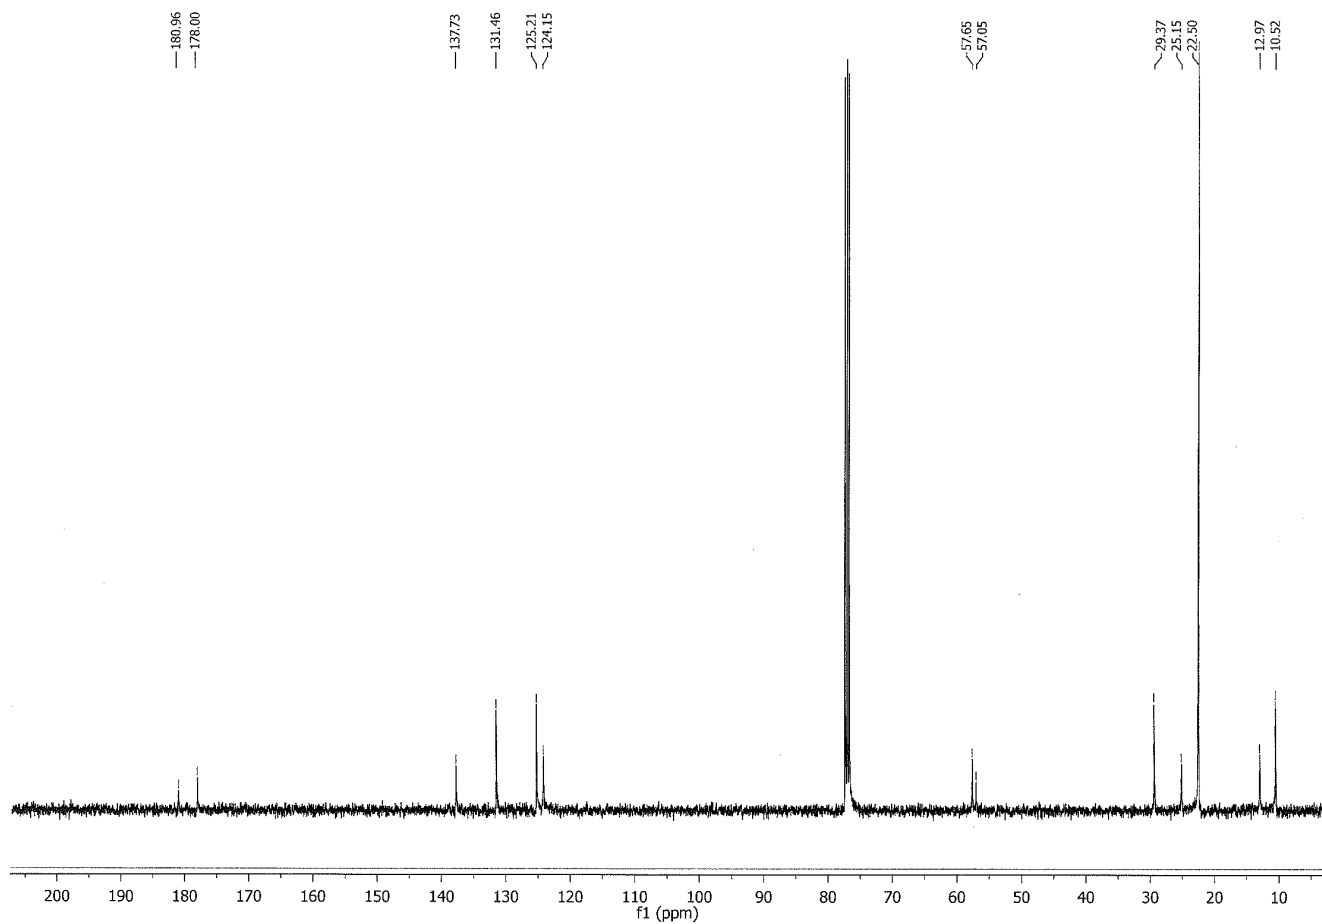



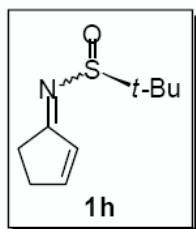

(65:35 diastereomeric mixture)

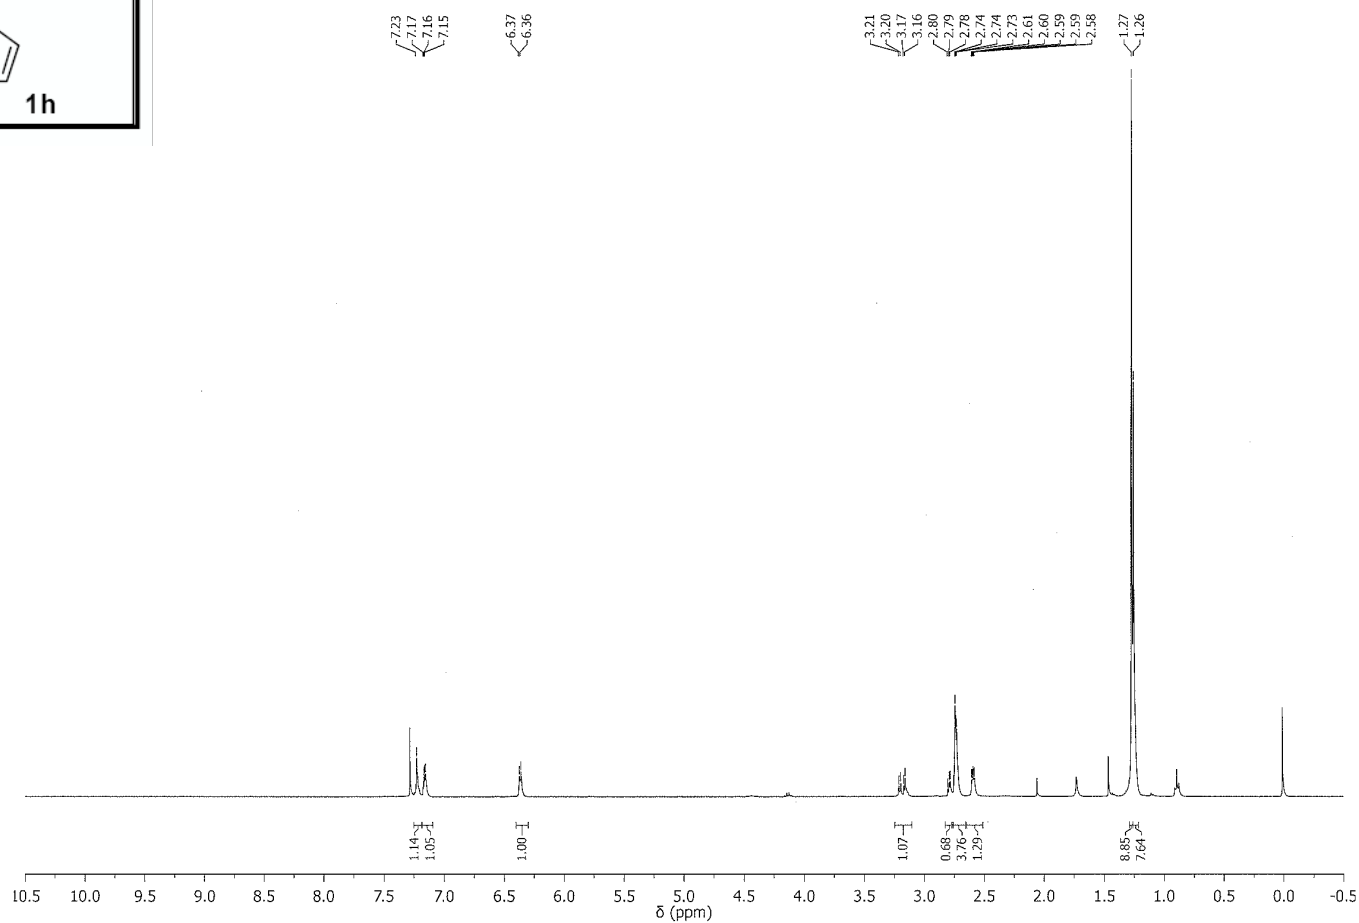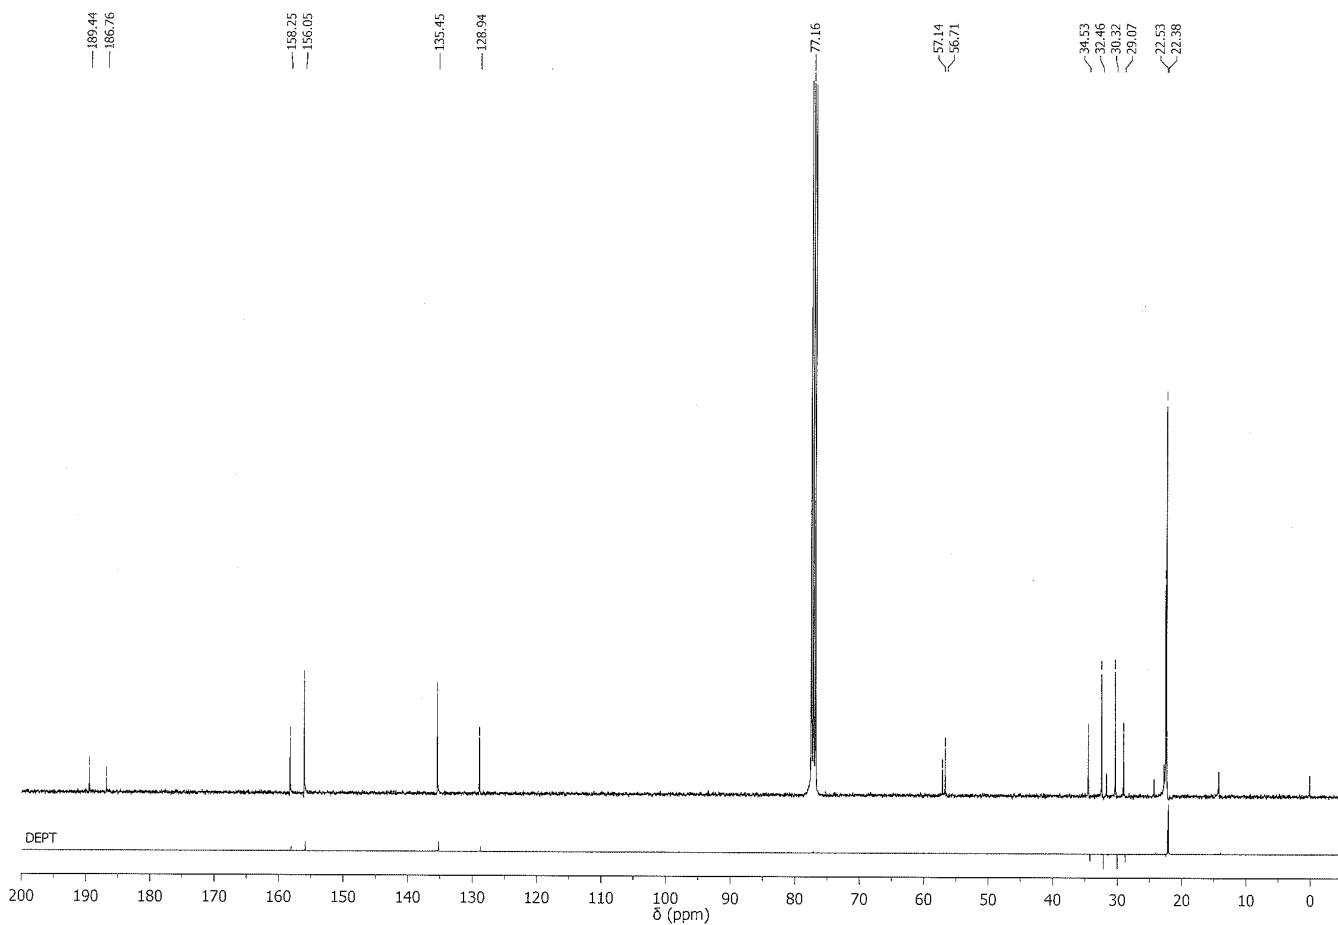

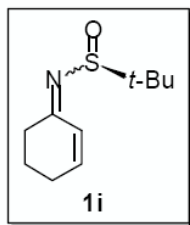

(60:40 diastereomeric mixture)

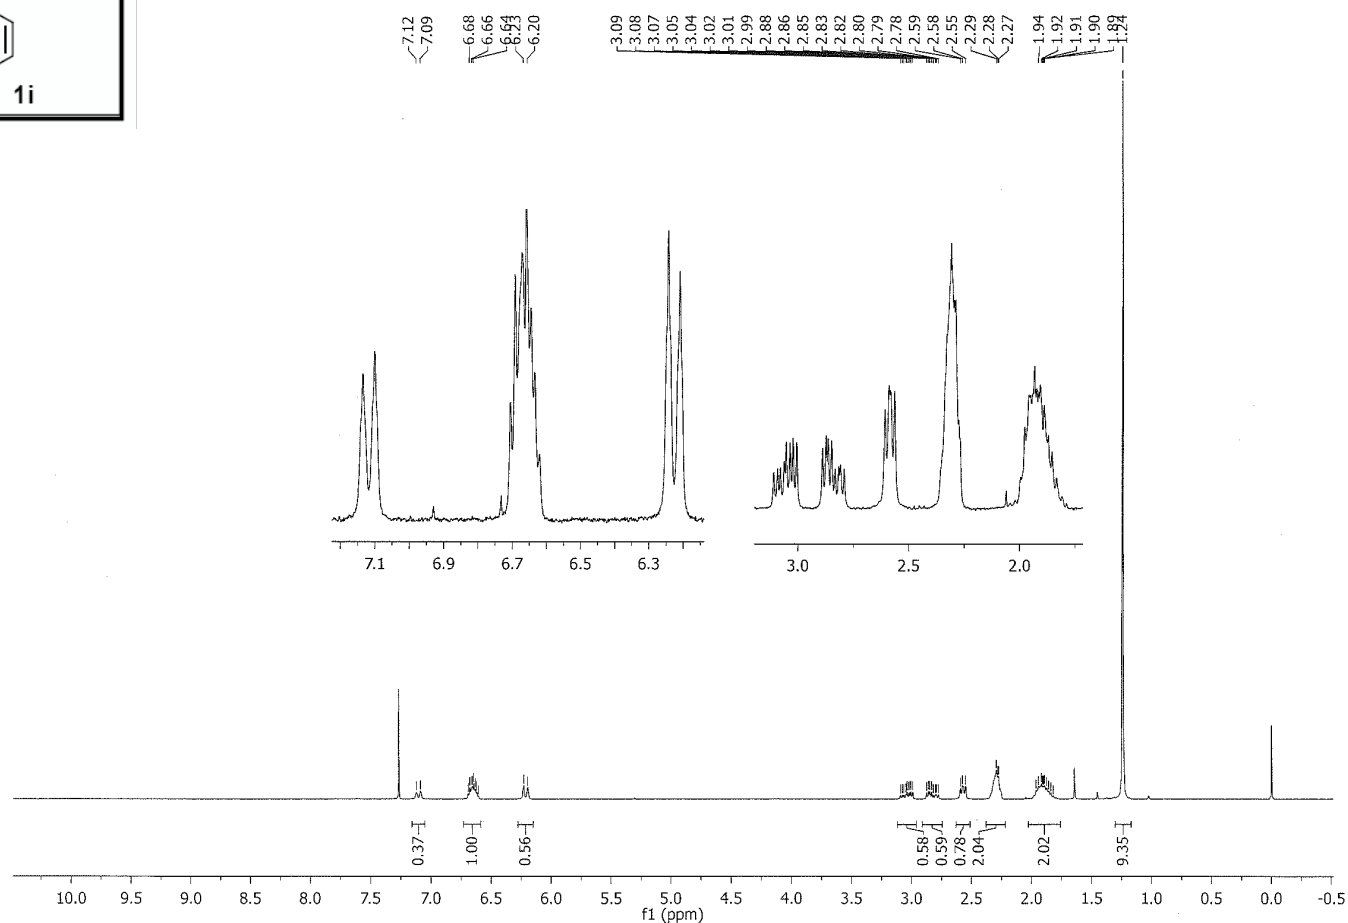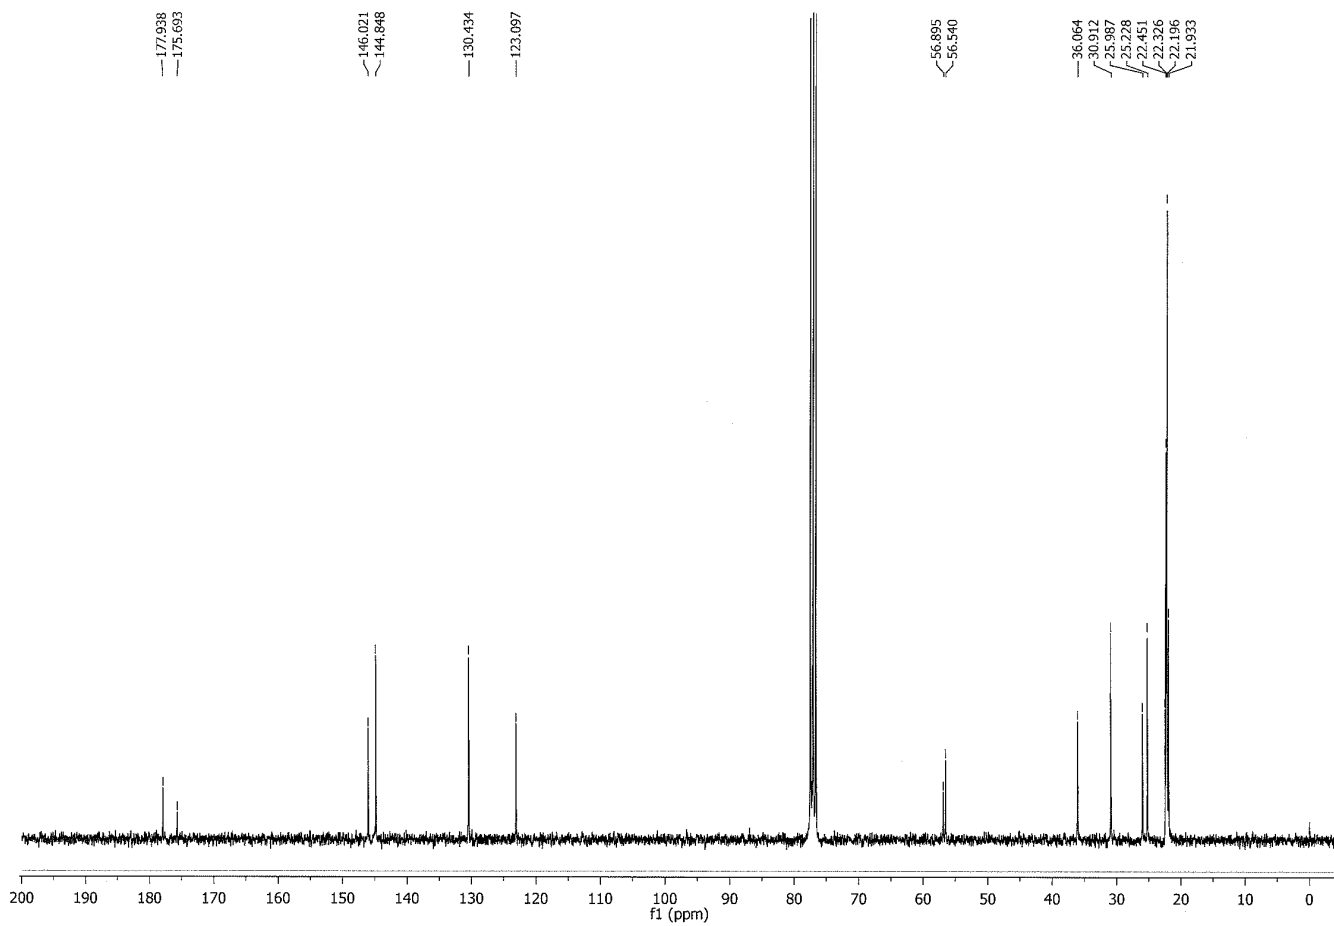

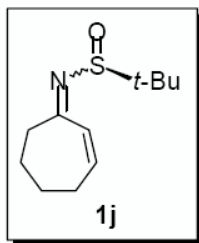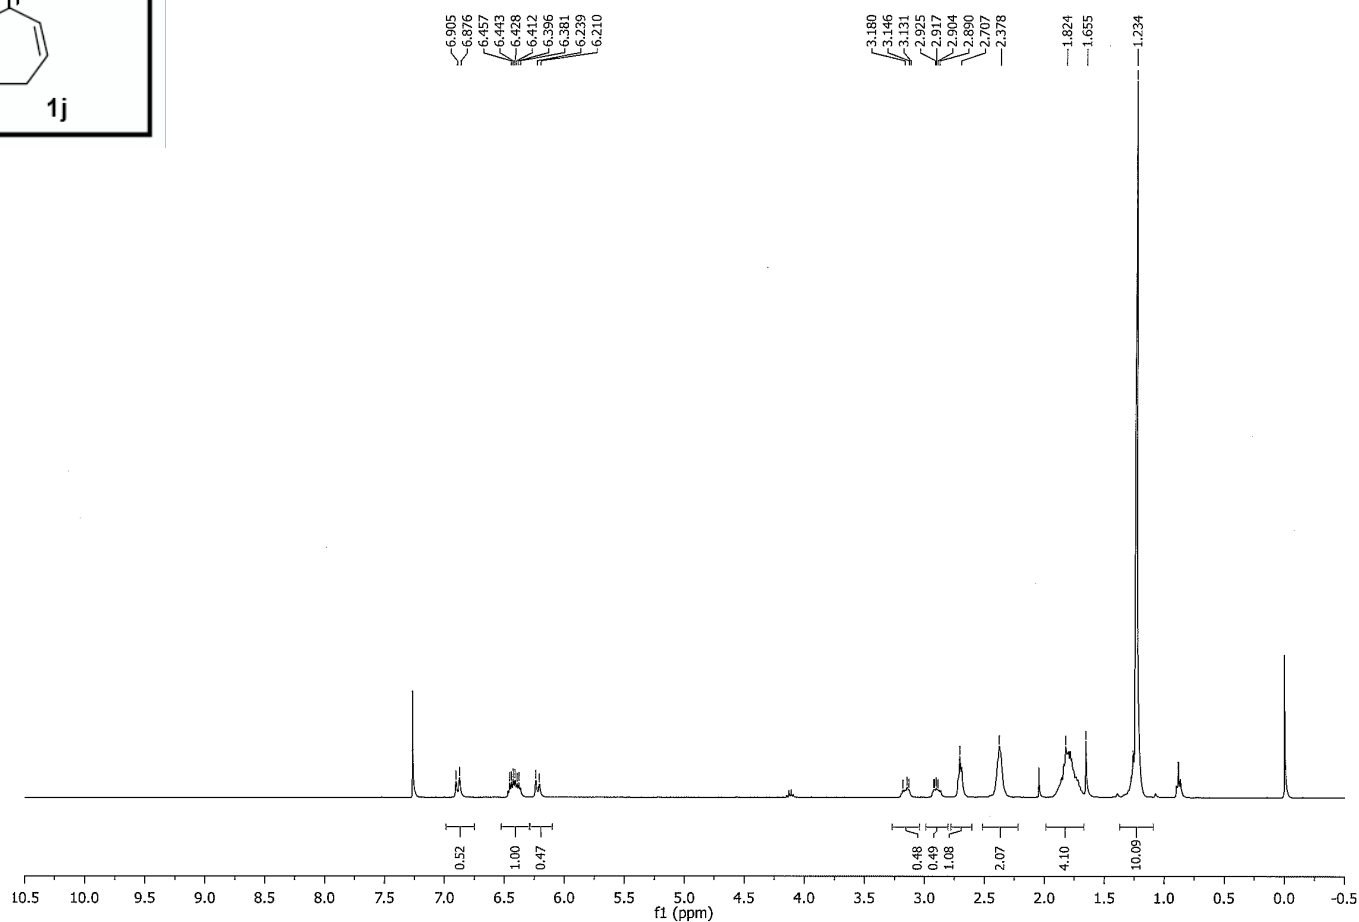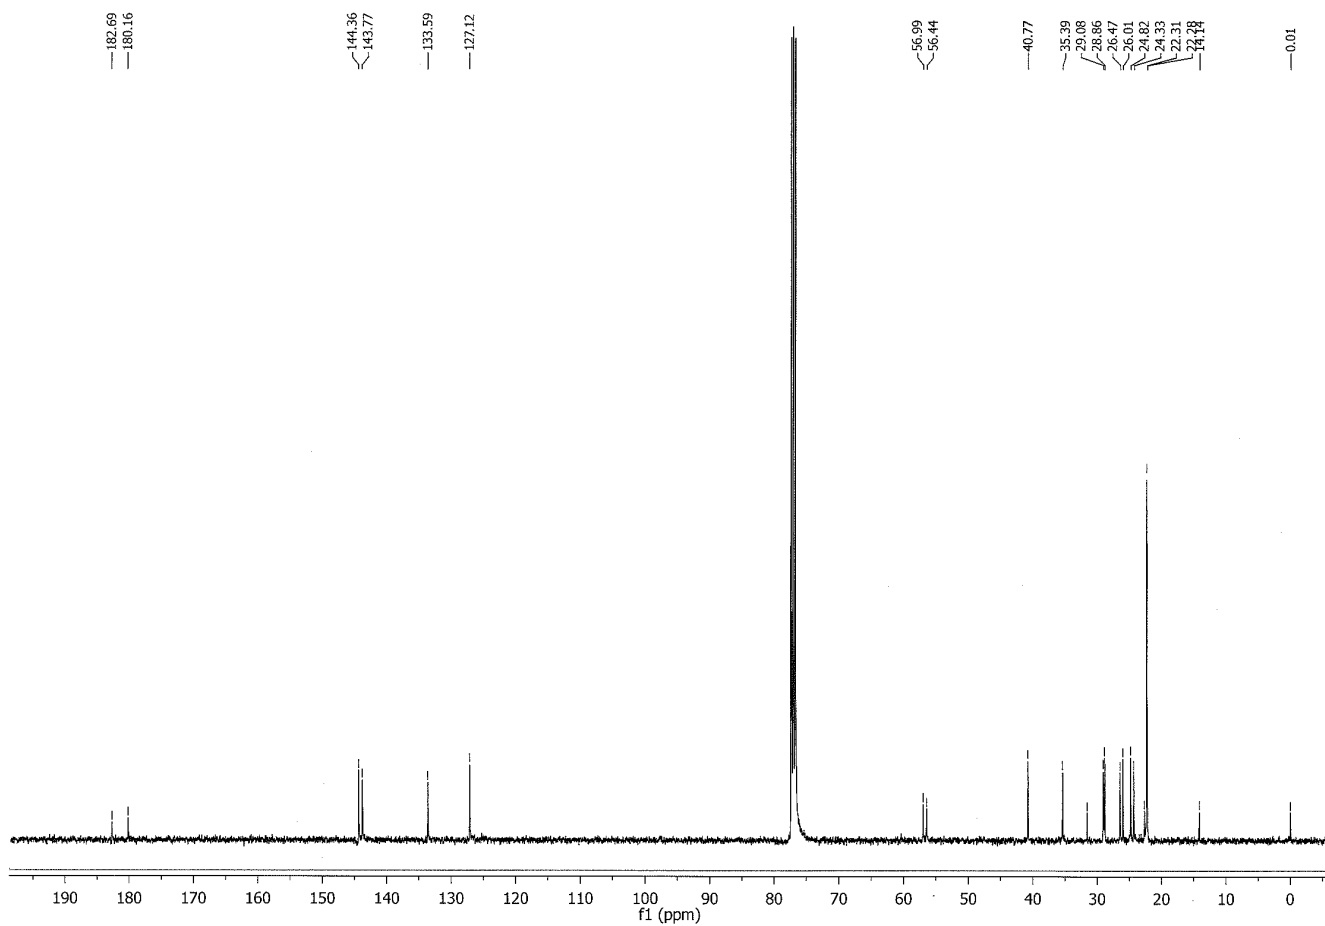

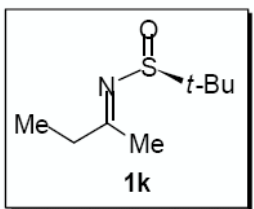

(5:1 diastereomeric mixture)

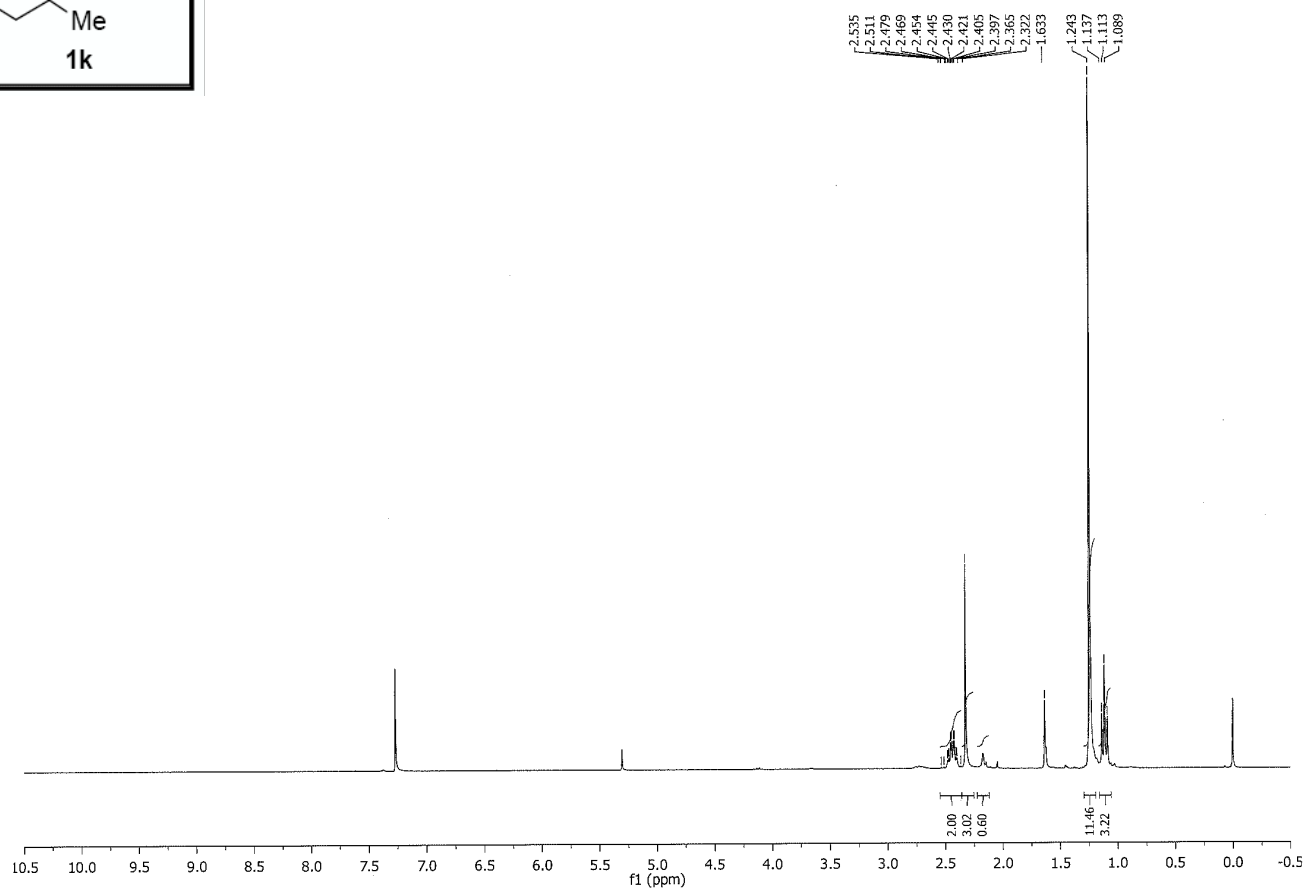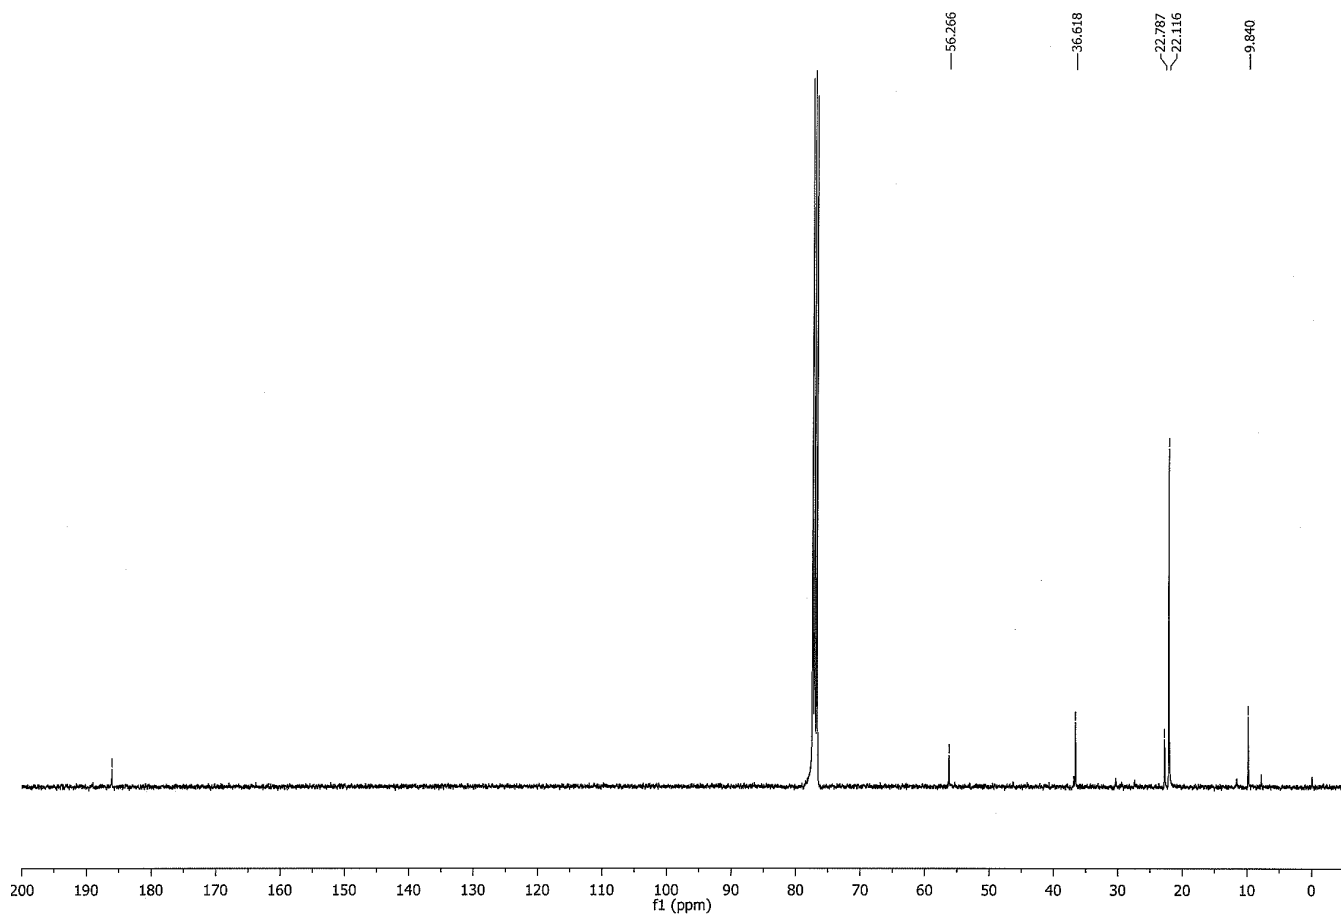

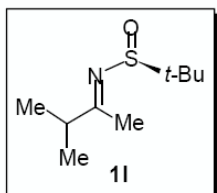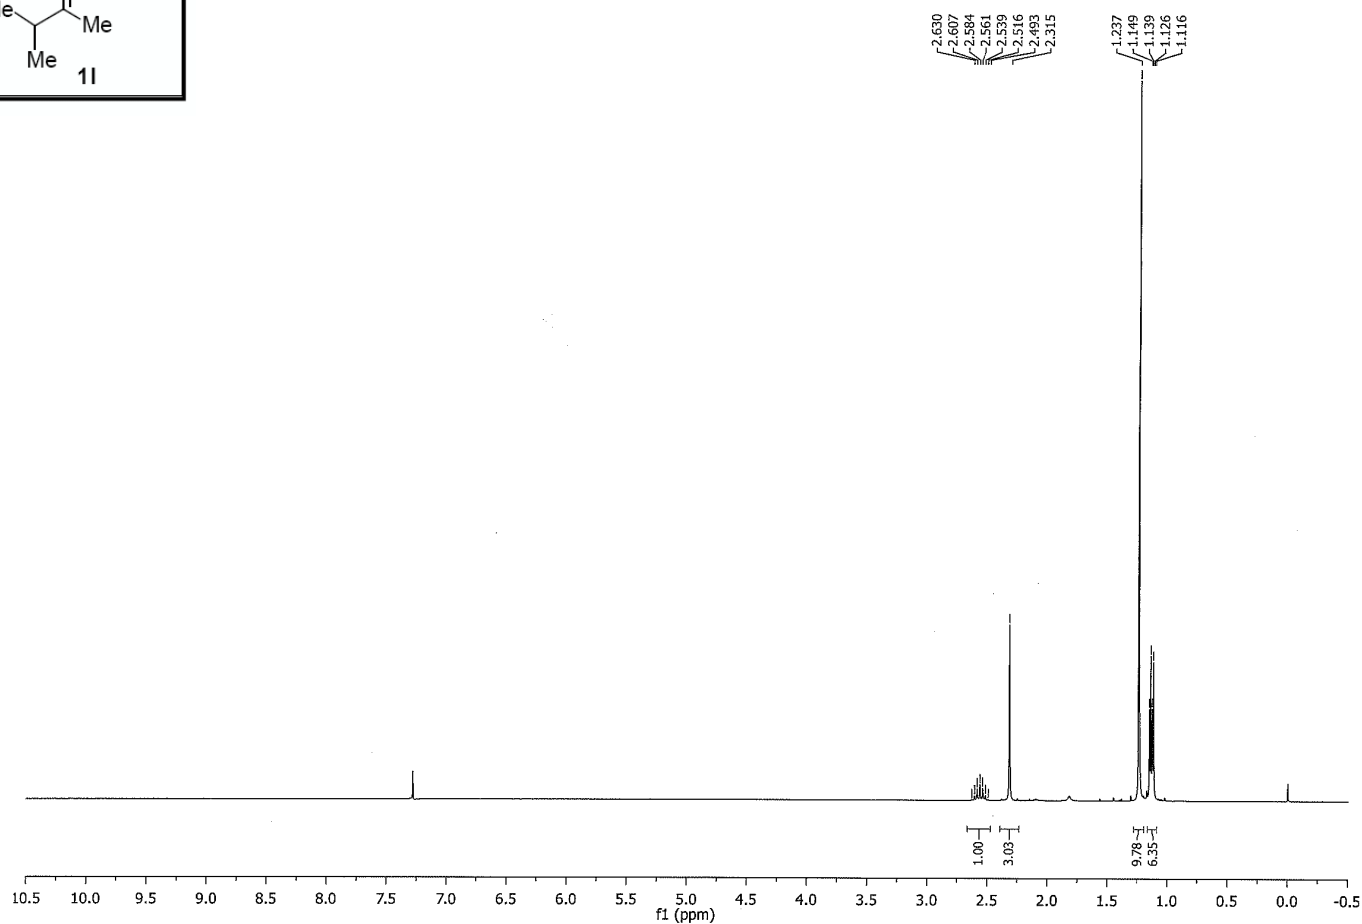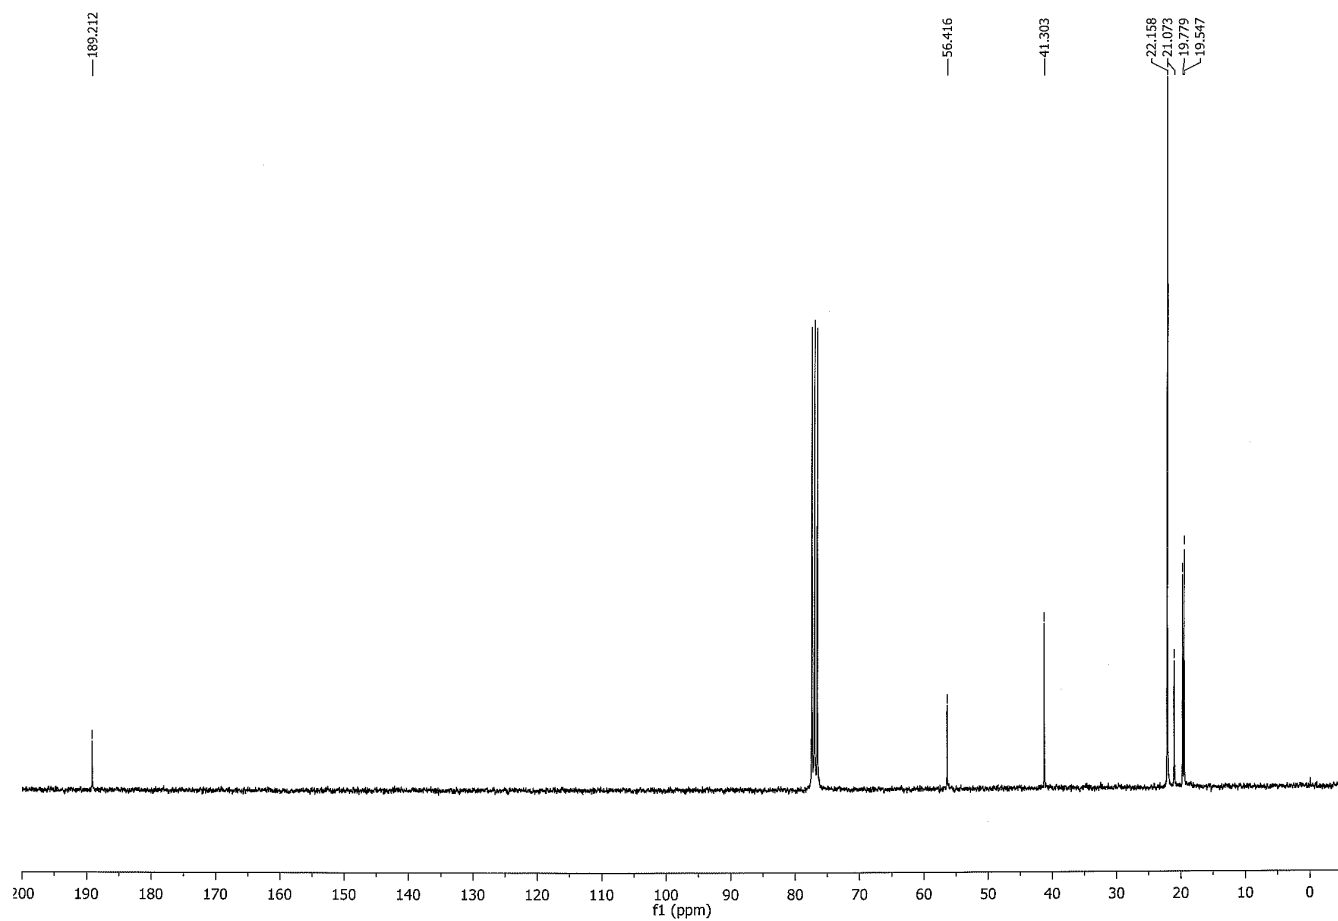

(5:1 diastereomeric mixture)

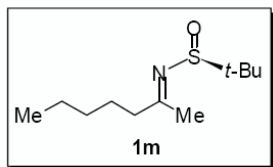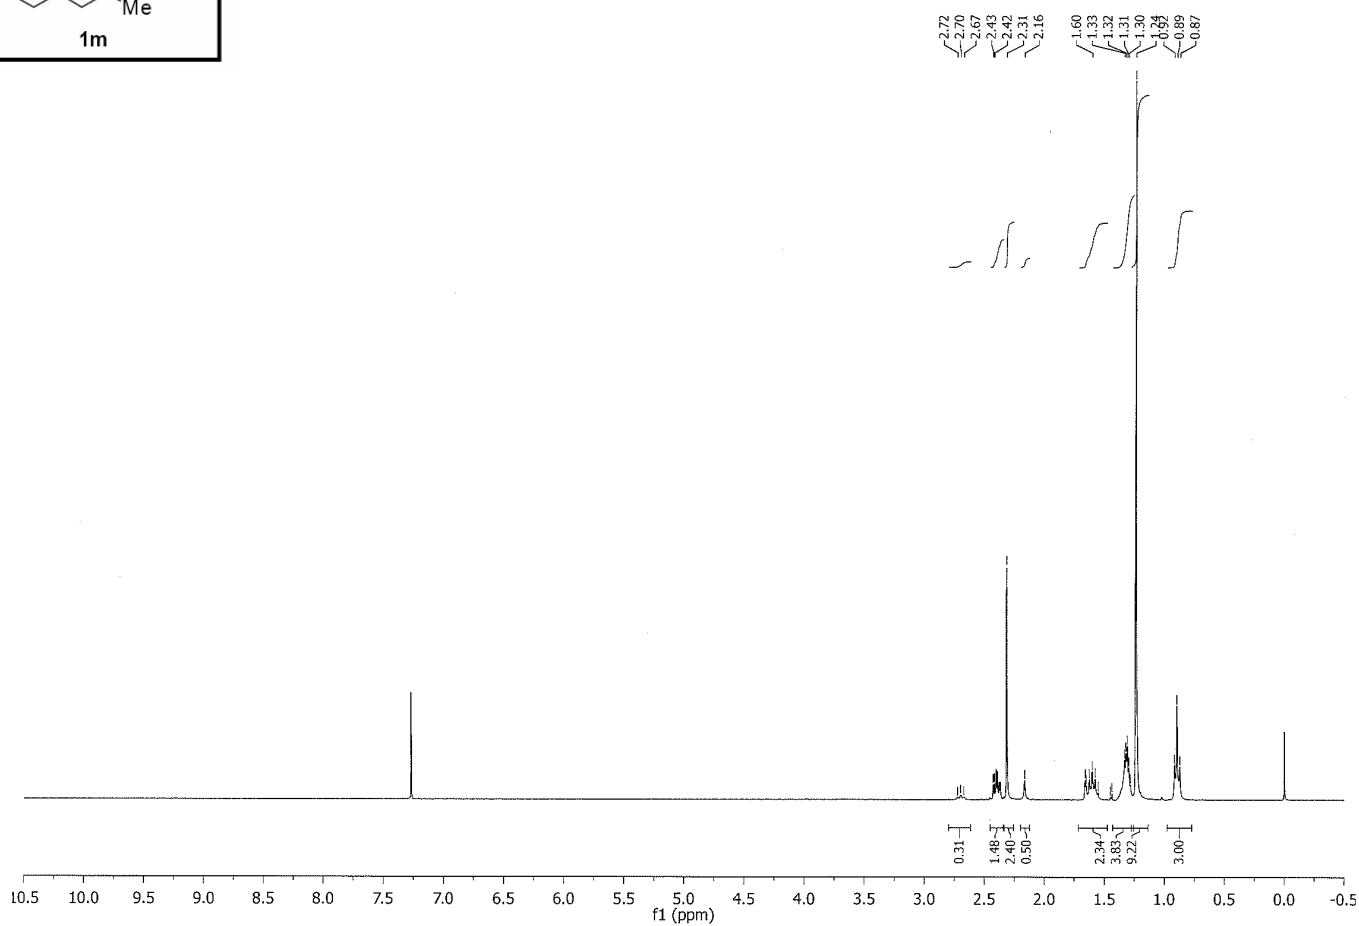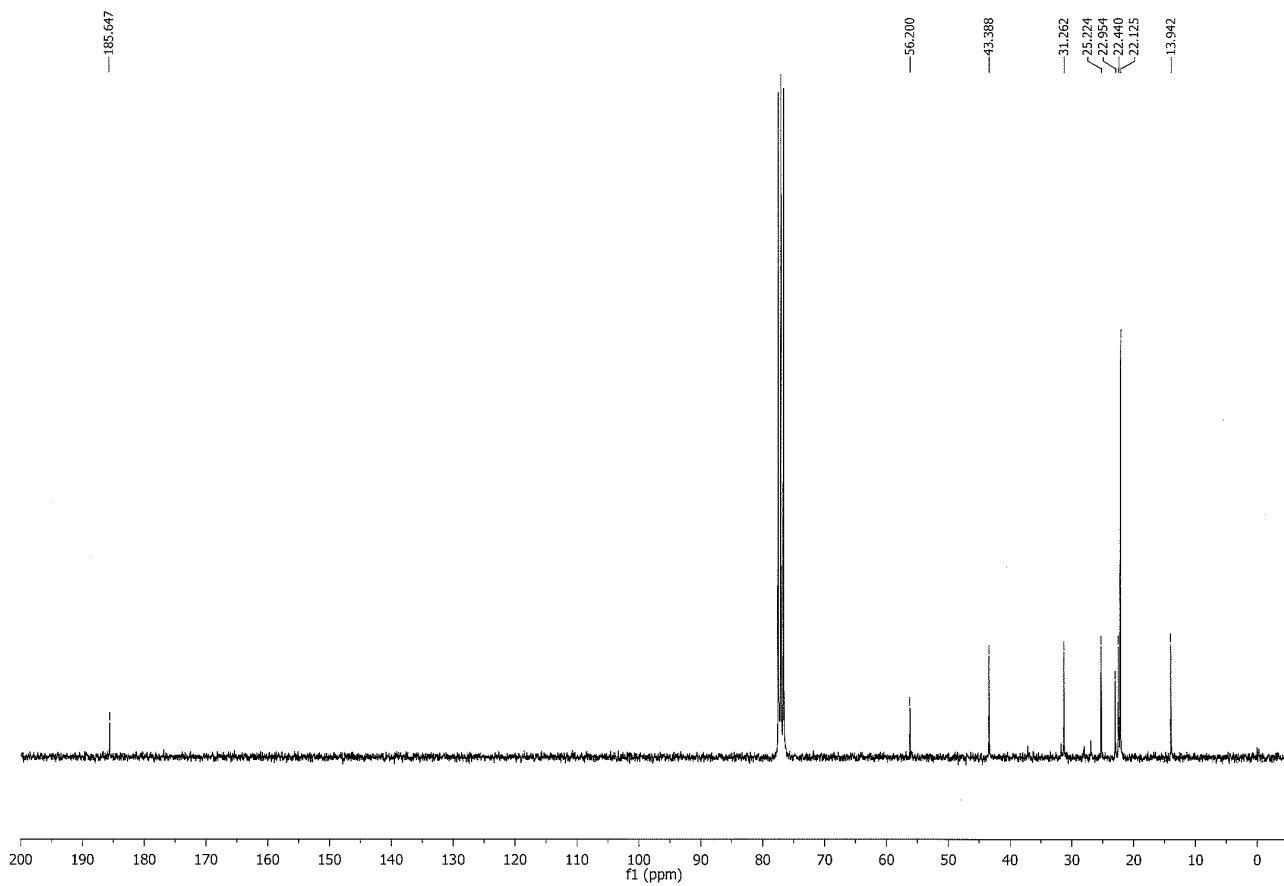

(82:18 diastereomeric mixture)

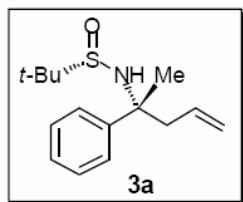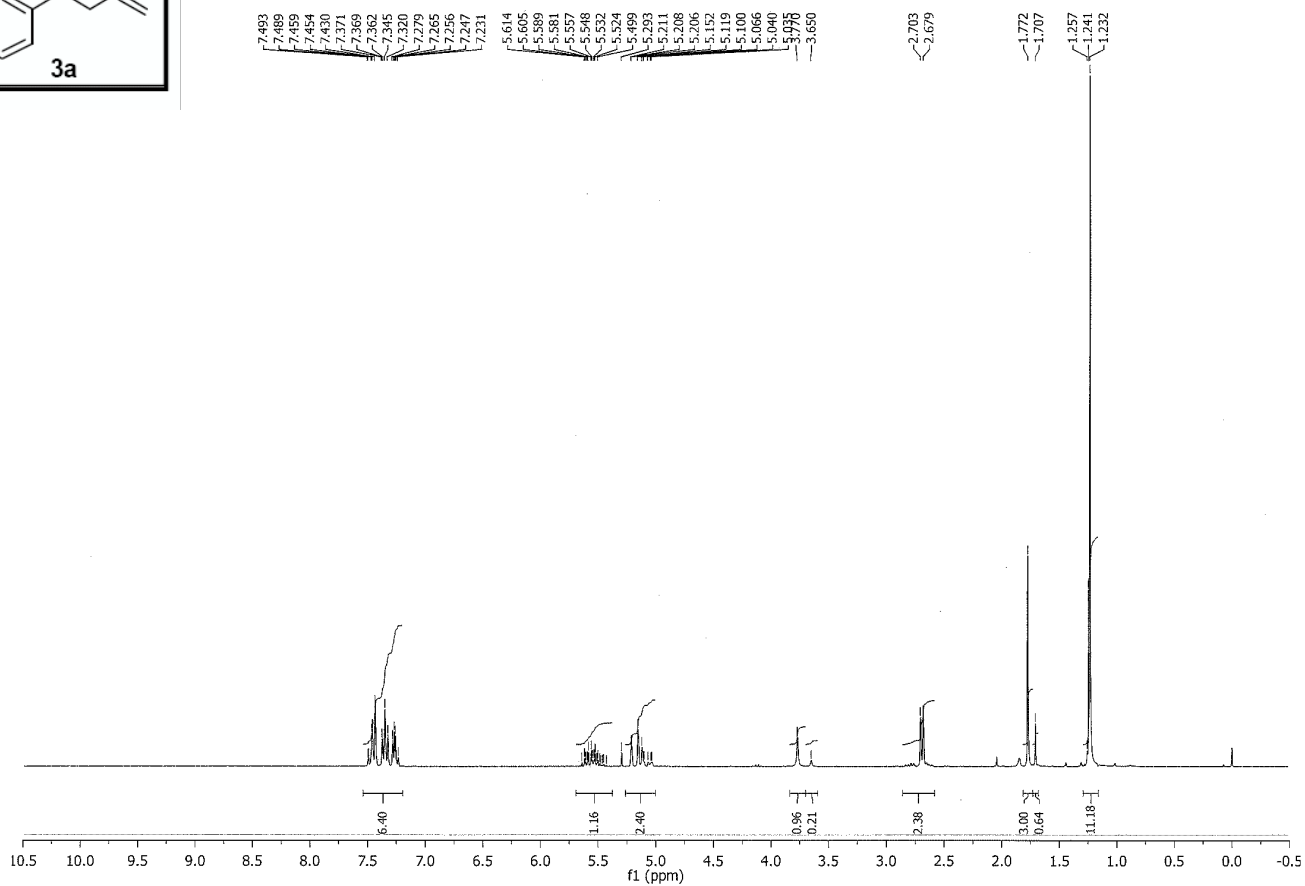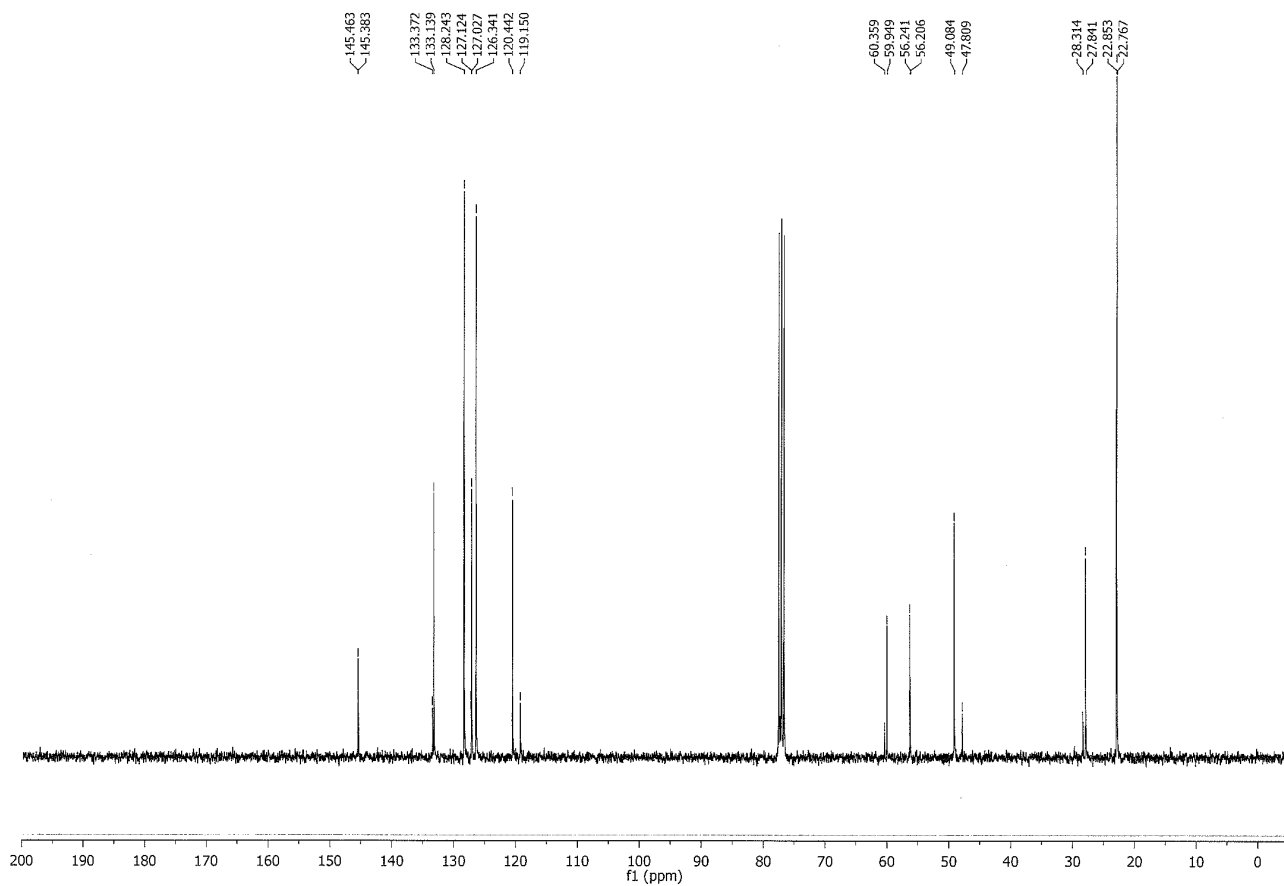

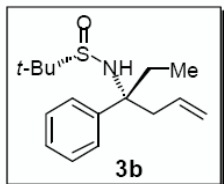

(75:25 diastereomeric mixture)

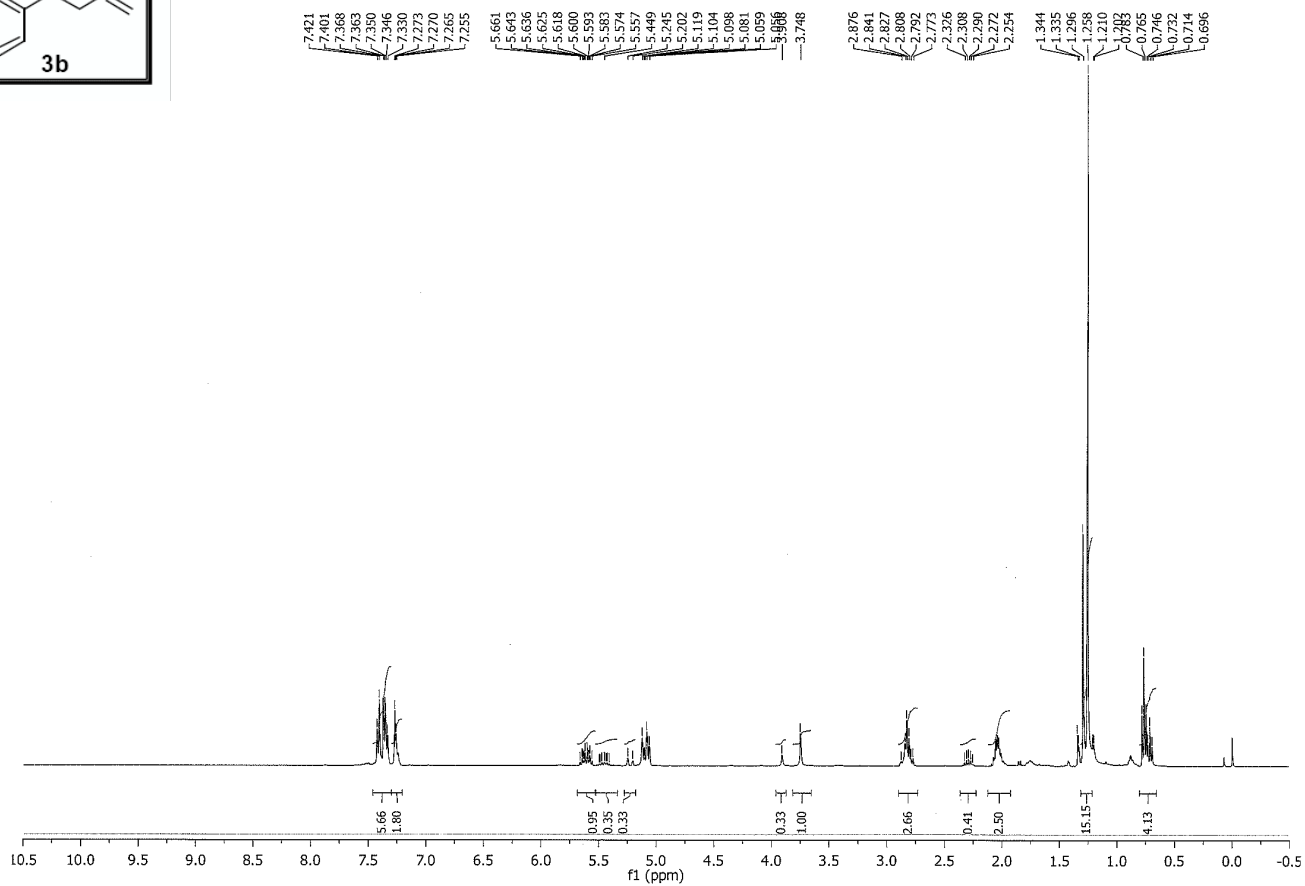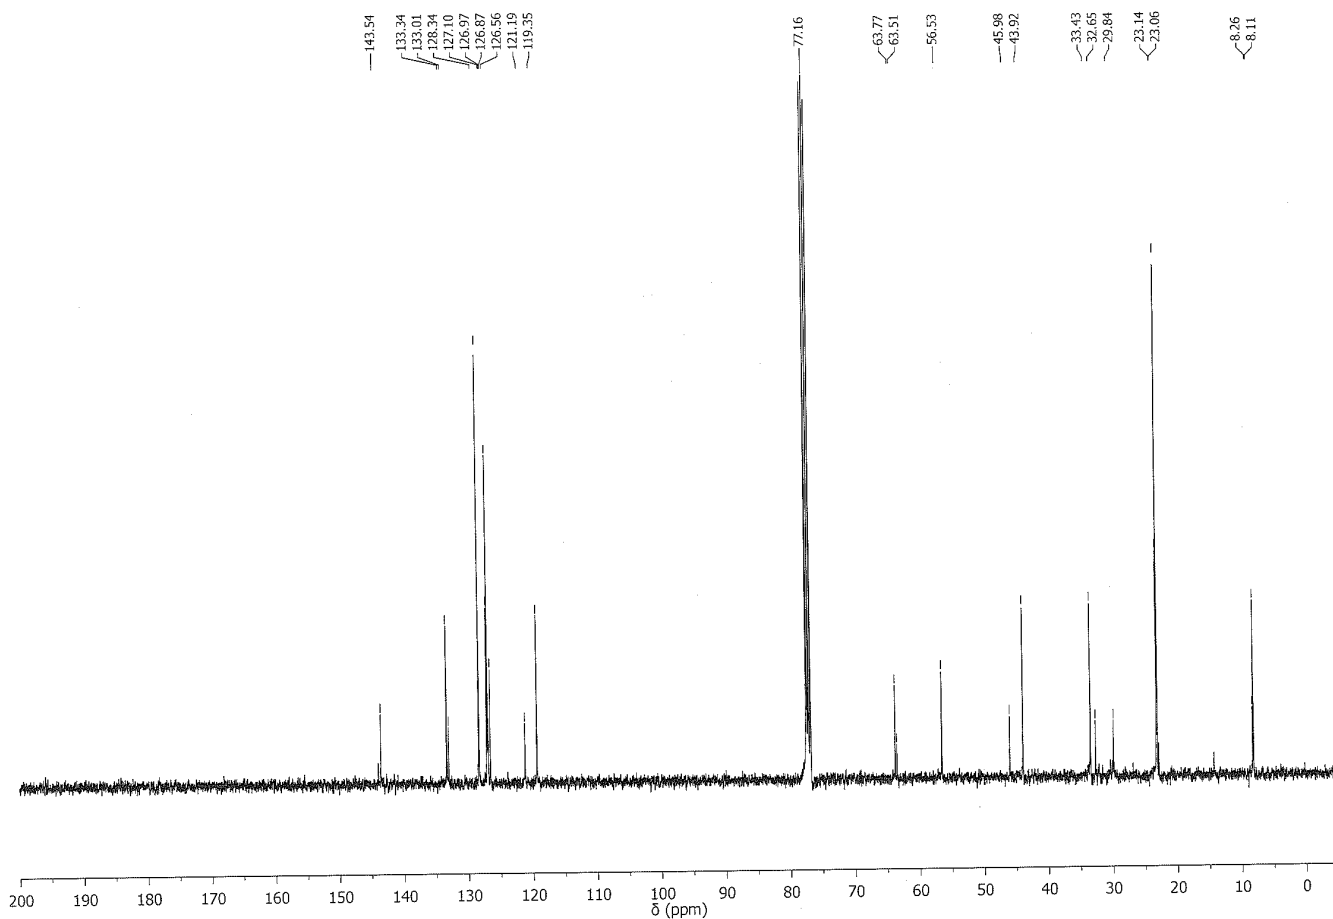



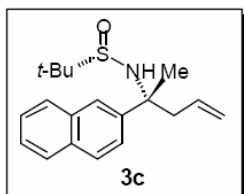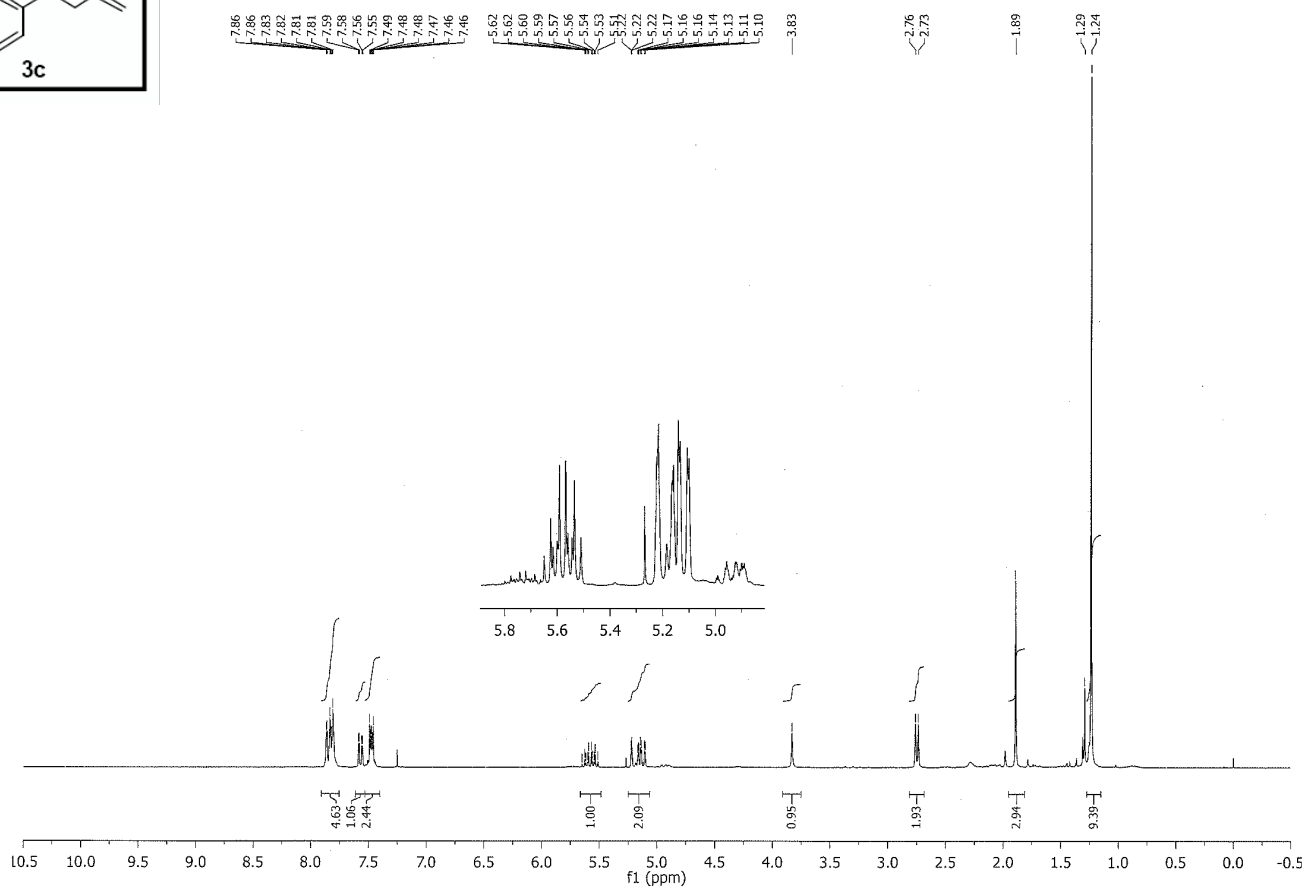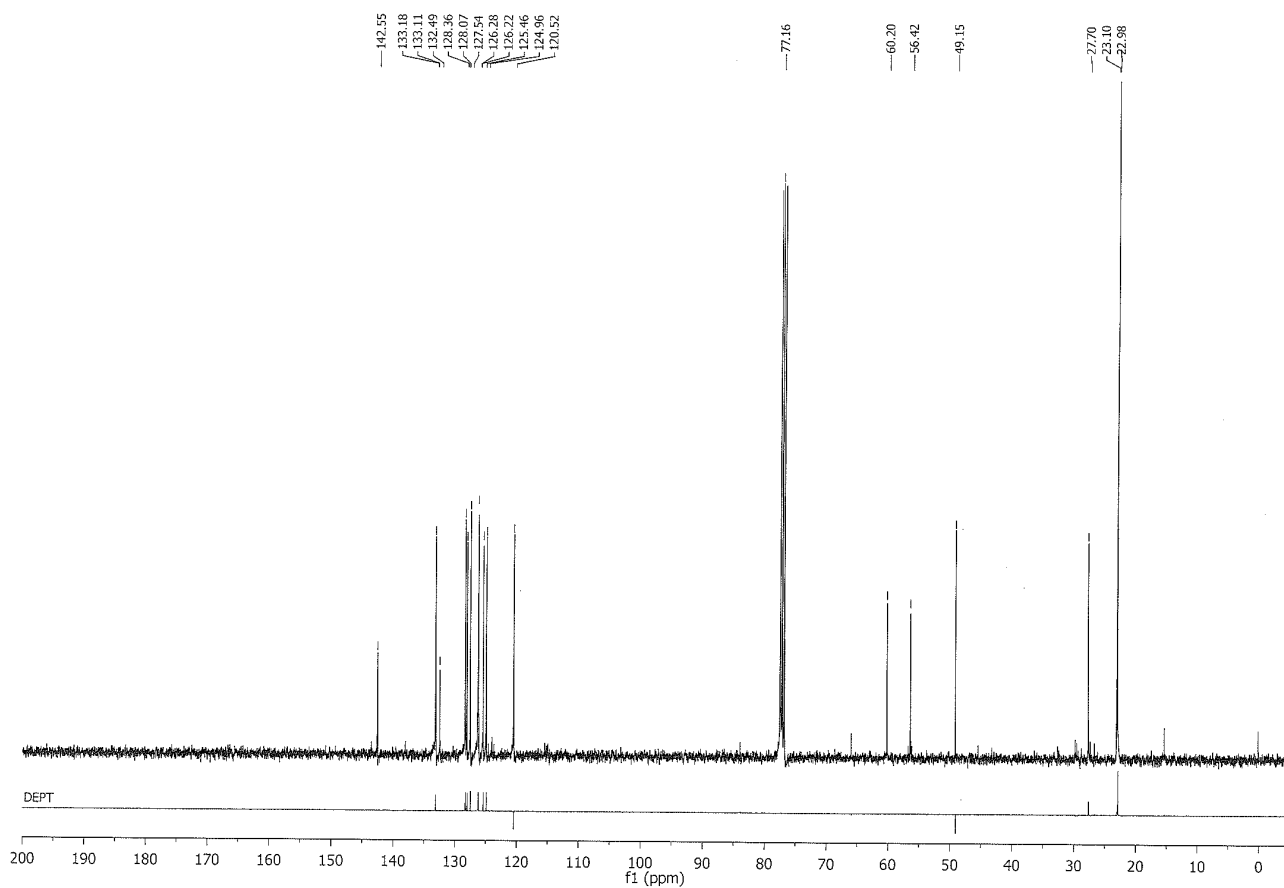

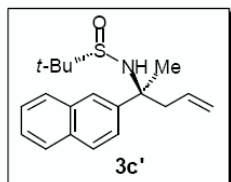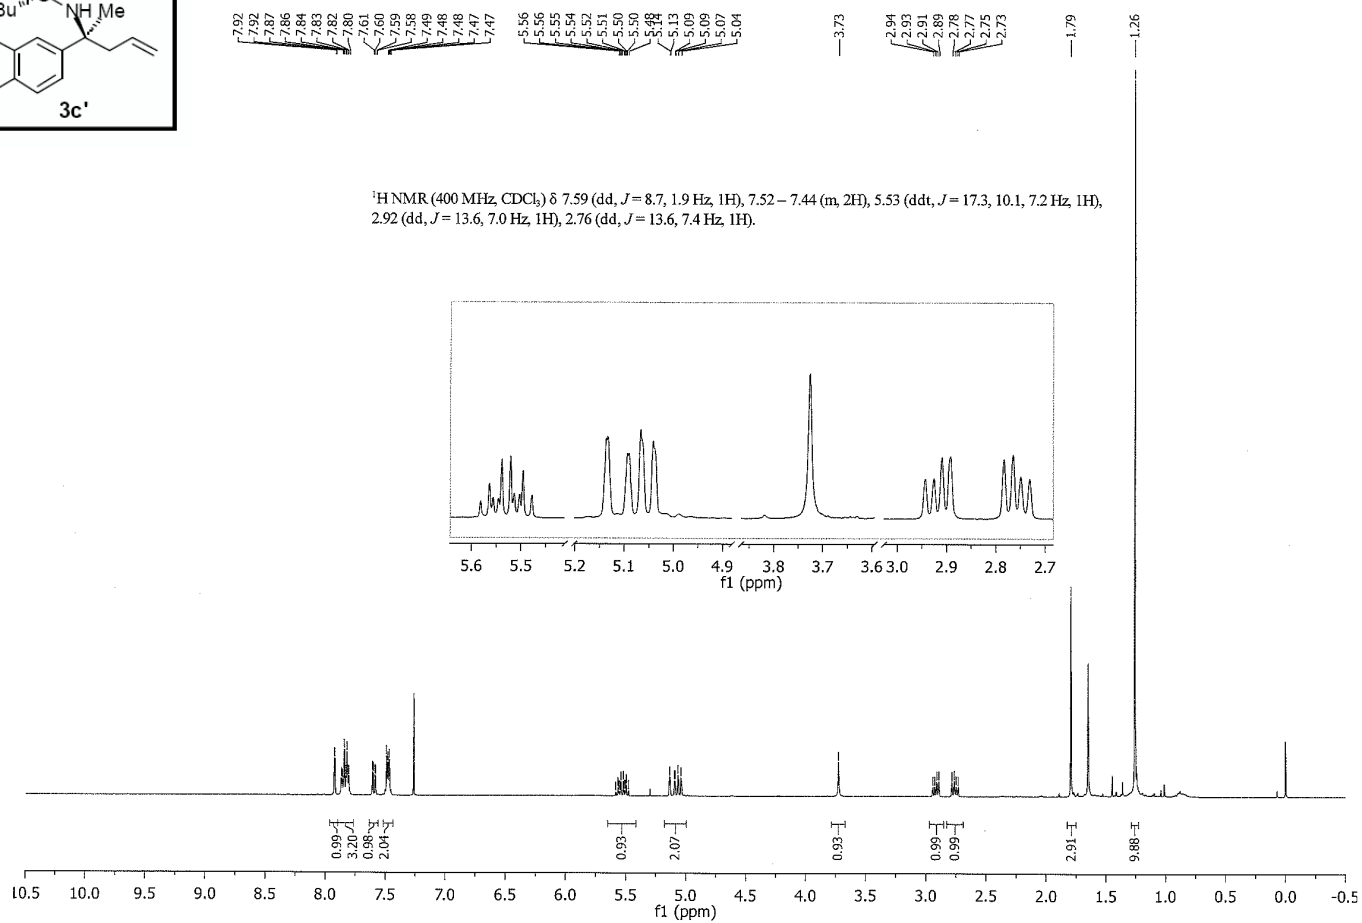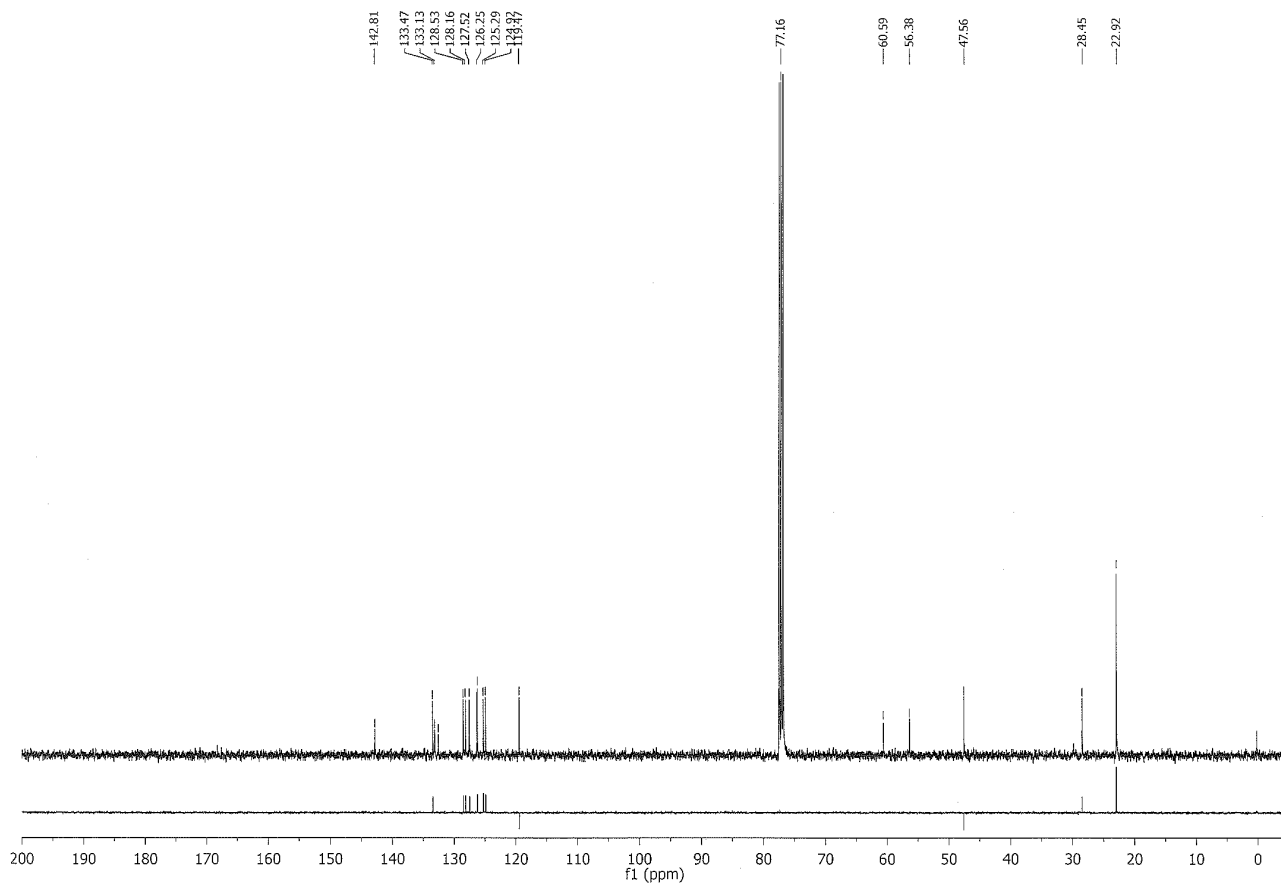

(80:20 diastereomeric mixture)

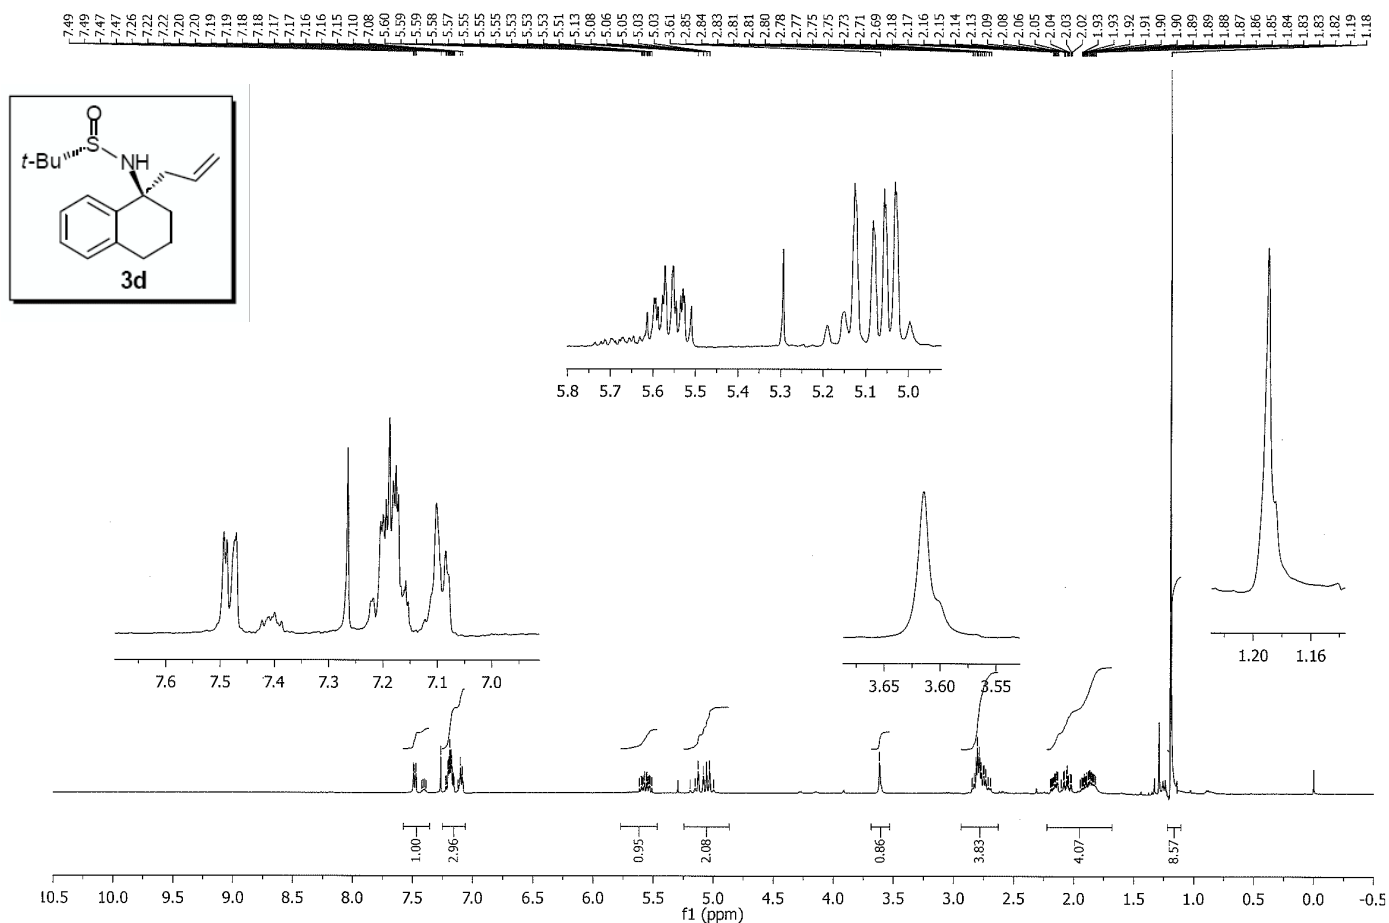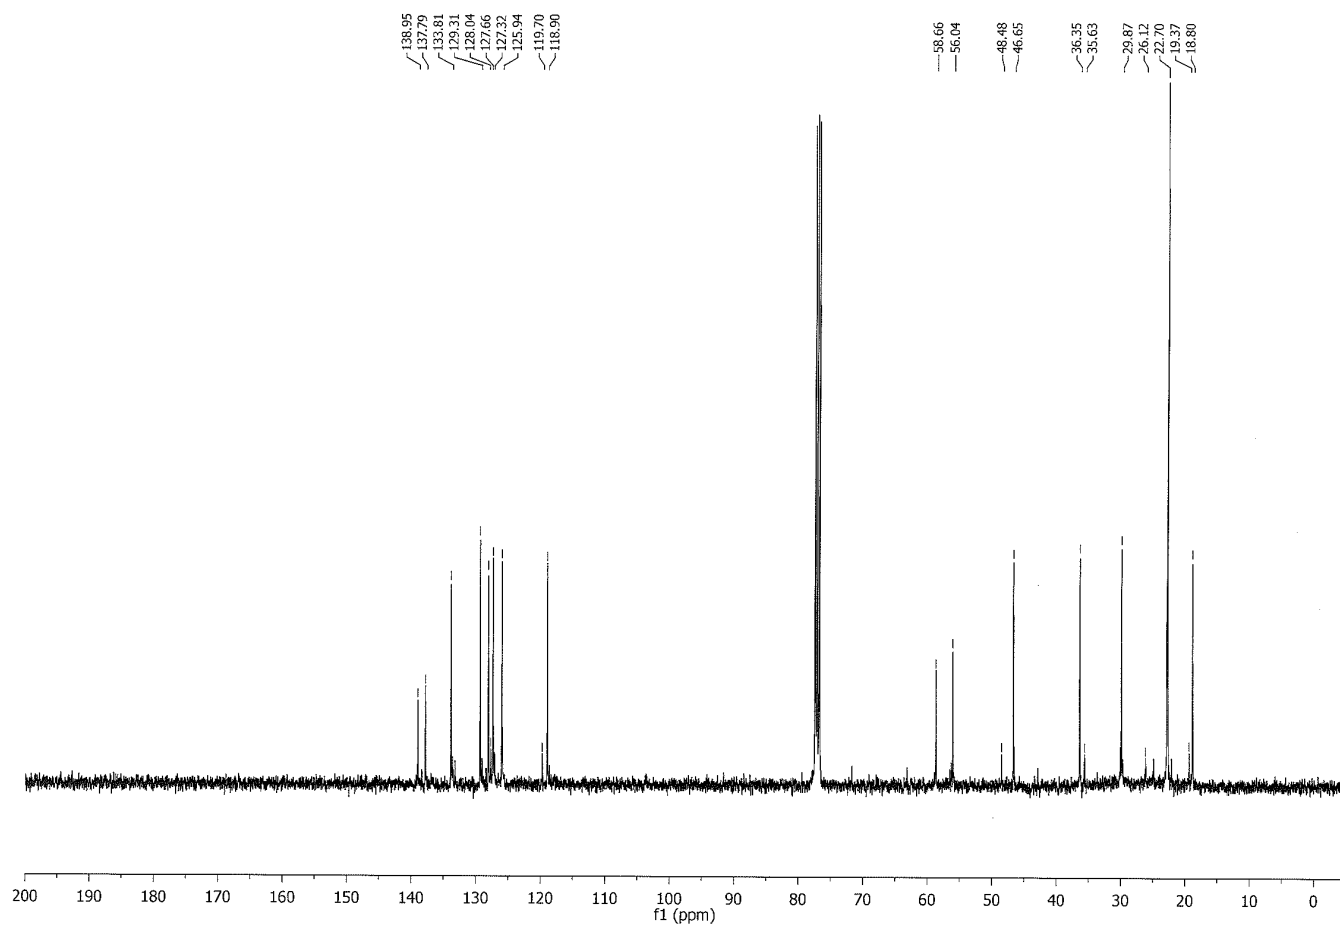

(85:15 diastereomeric mixture)

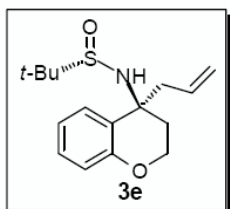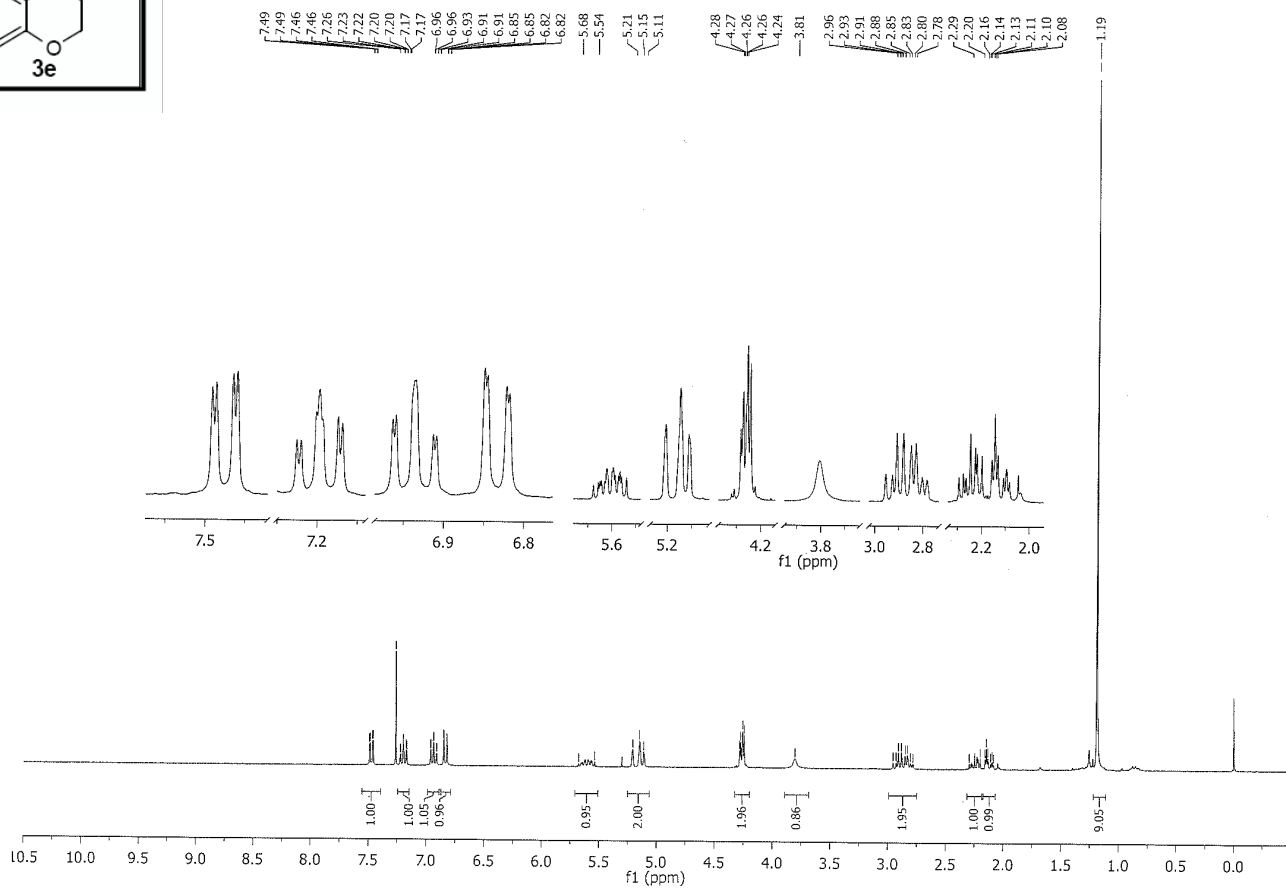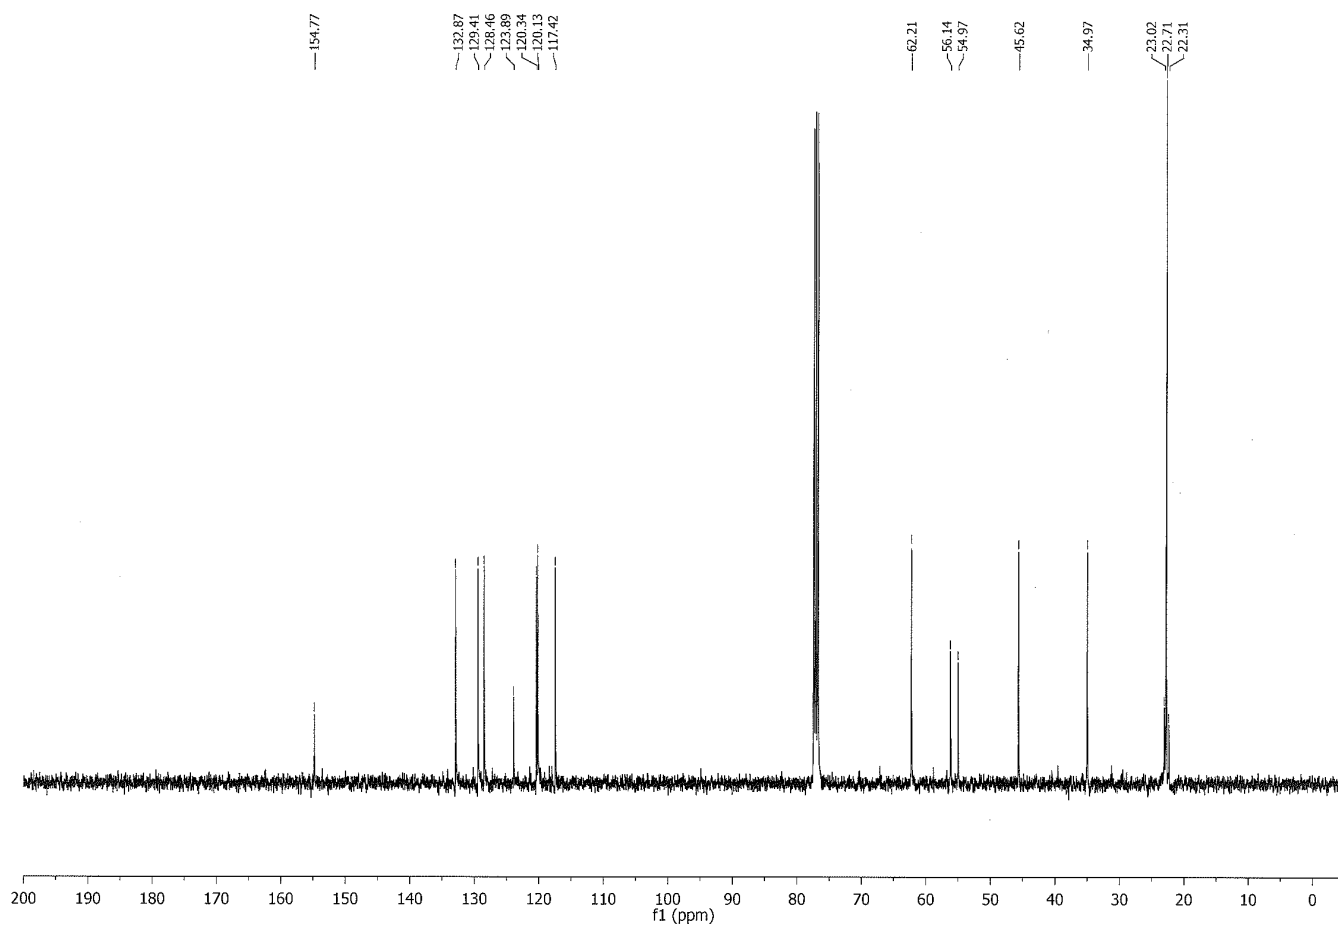

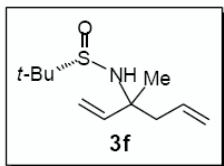

(59:41 diastereomeric mixture)

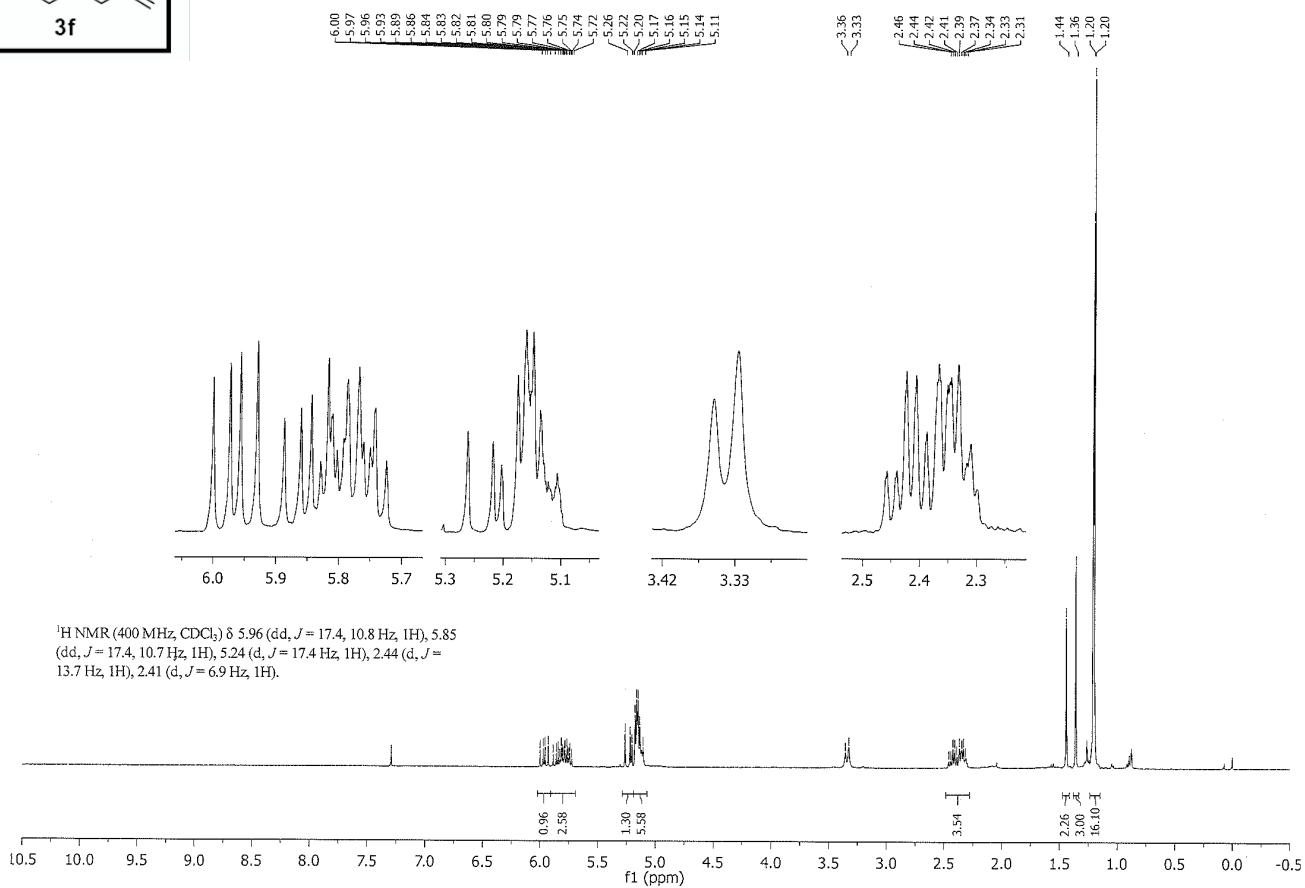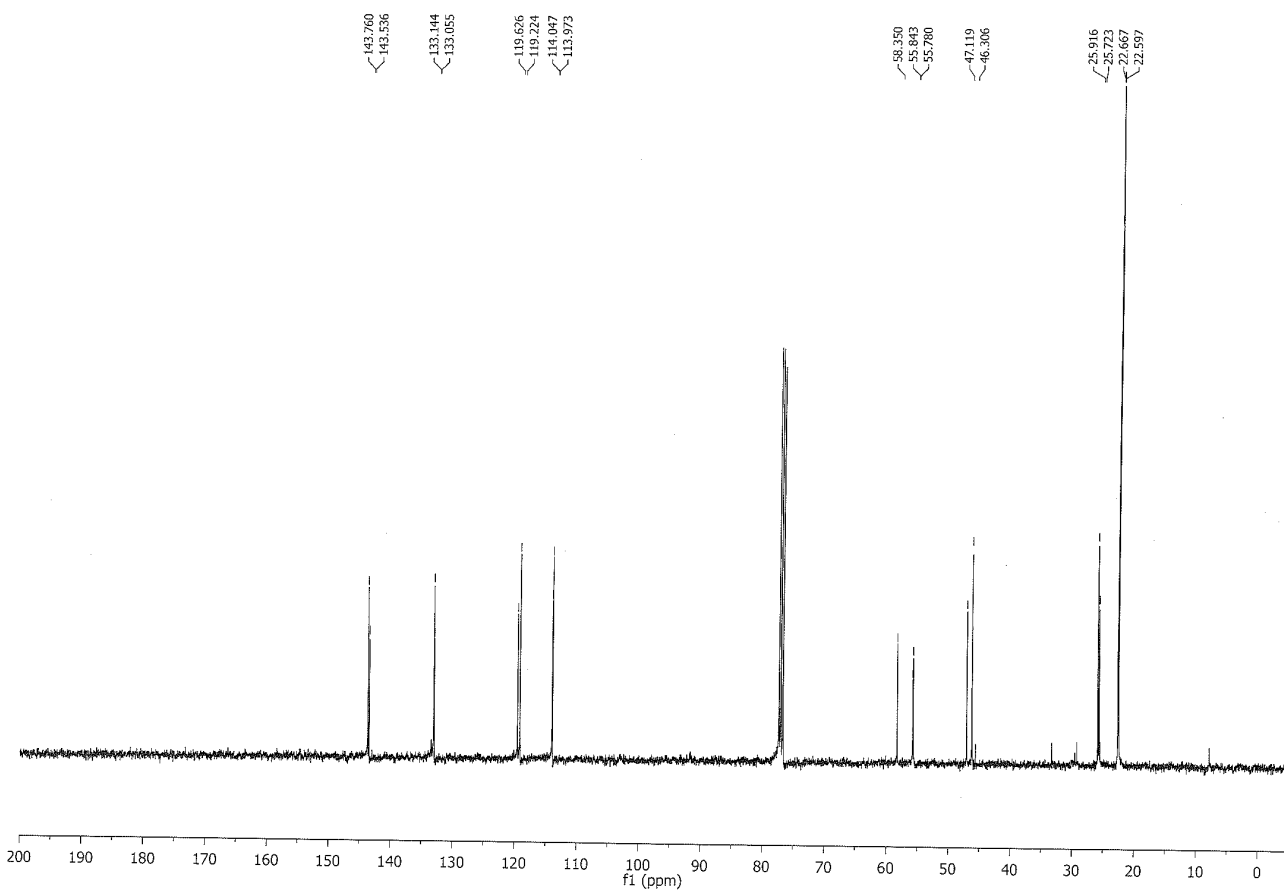

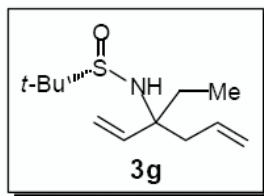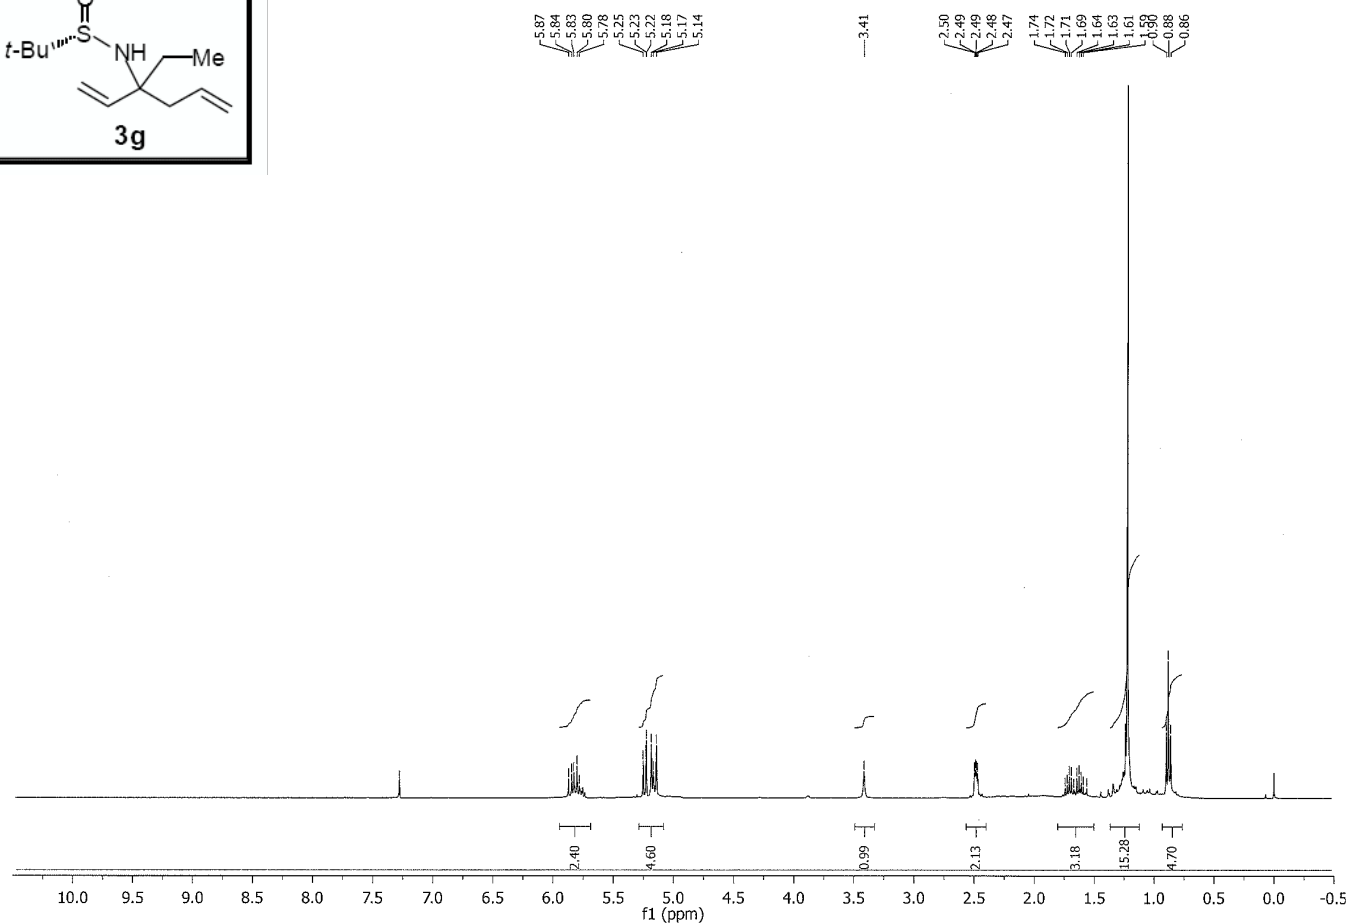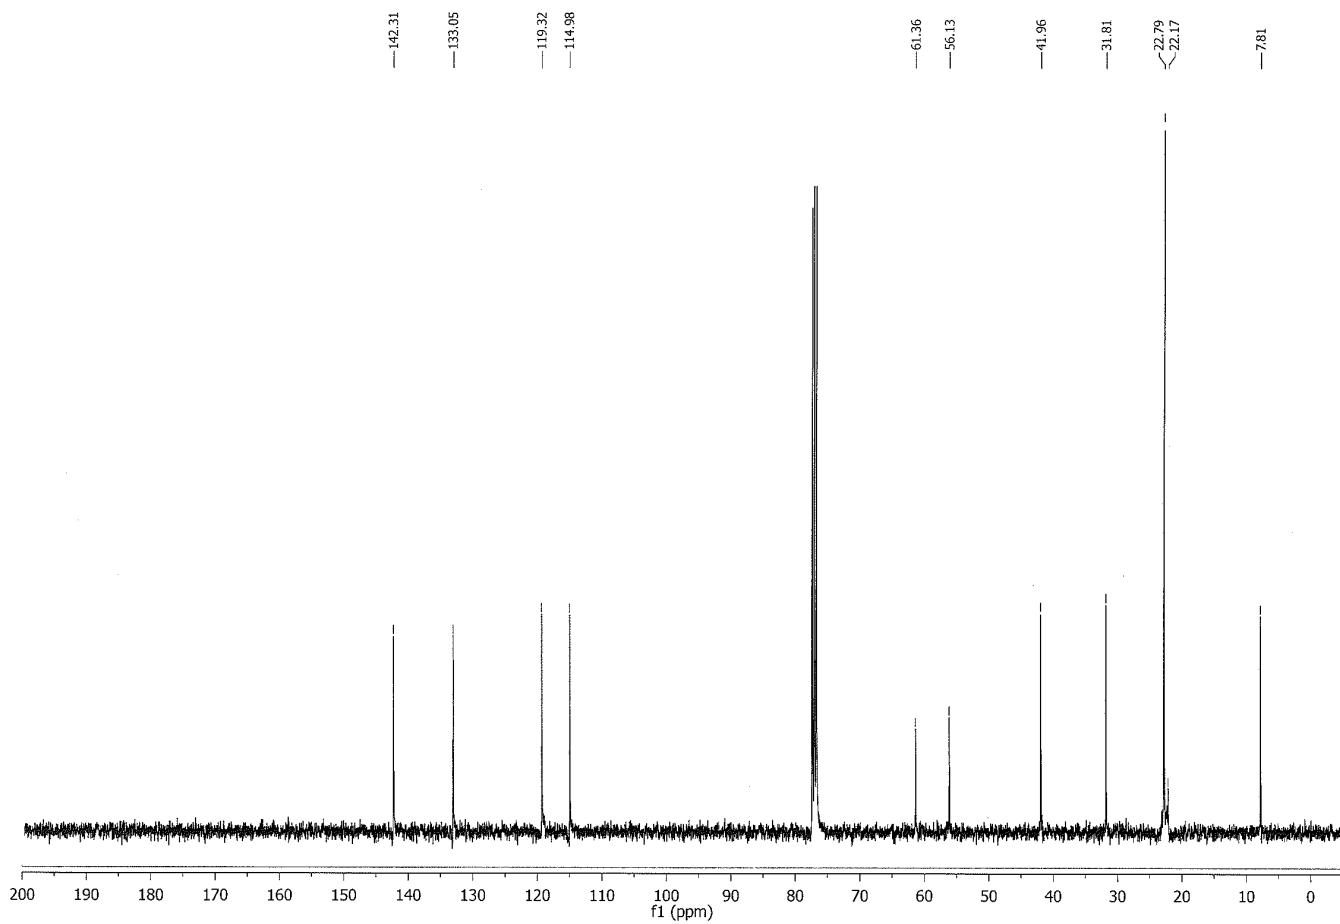

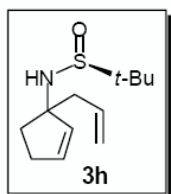

(80:20 diastereomeric mixture)

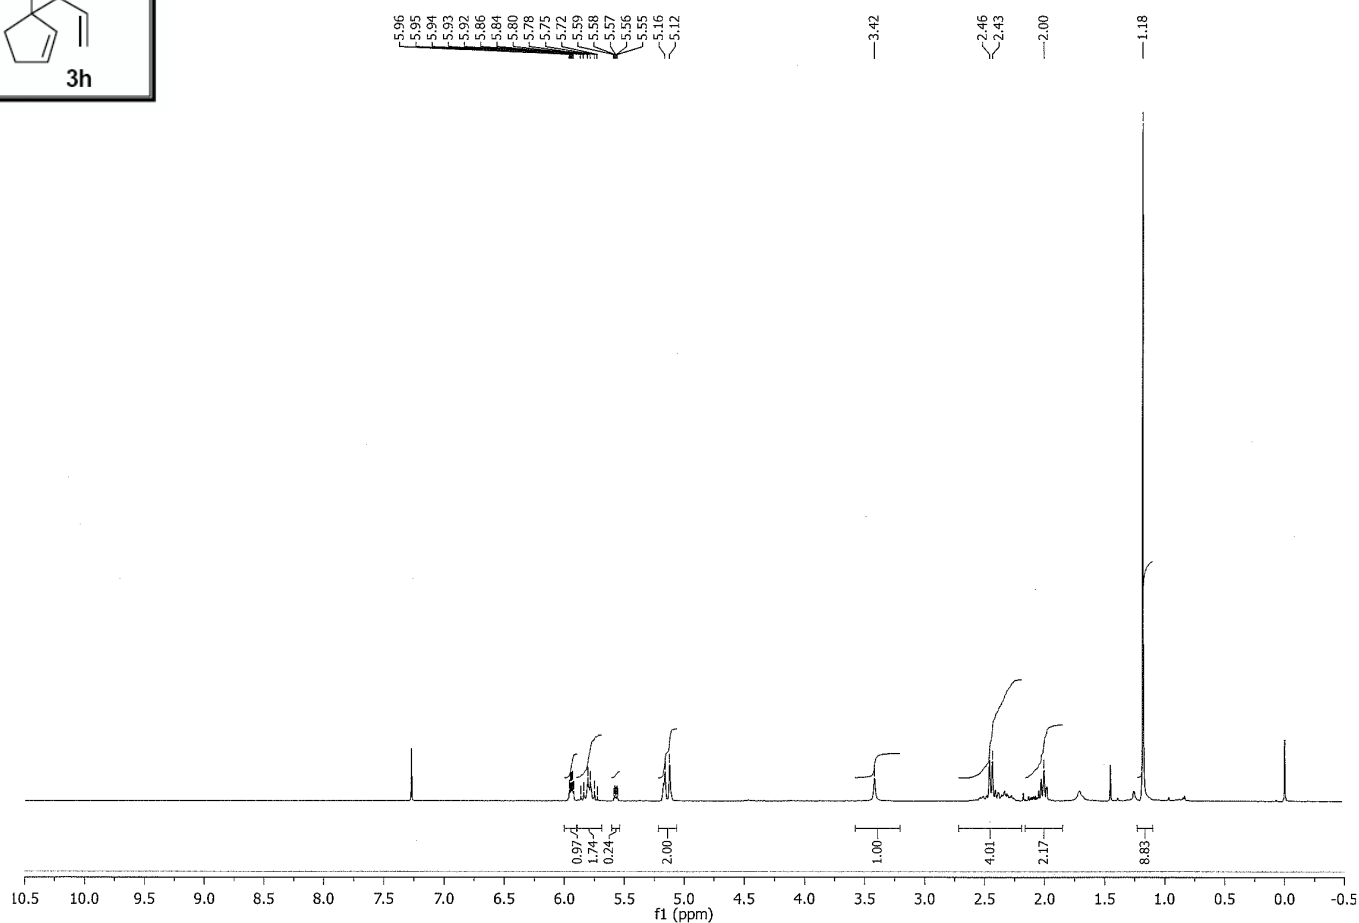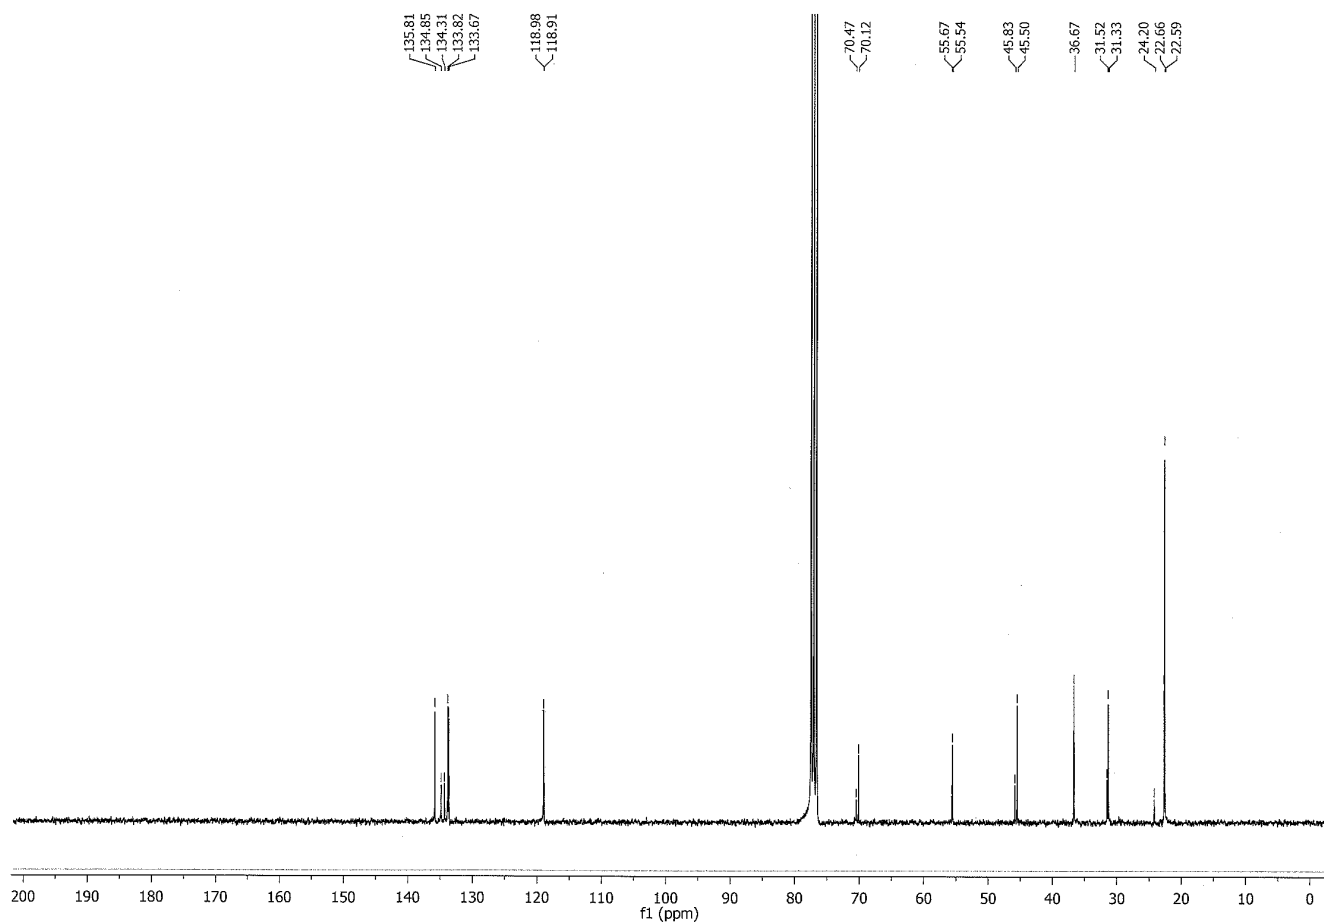

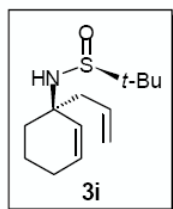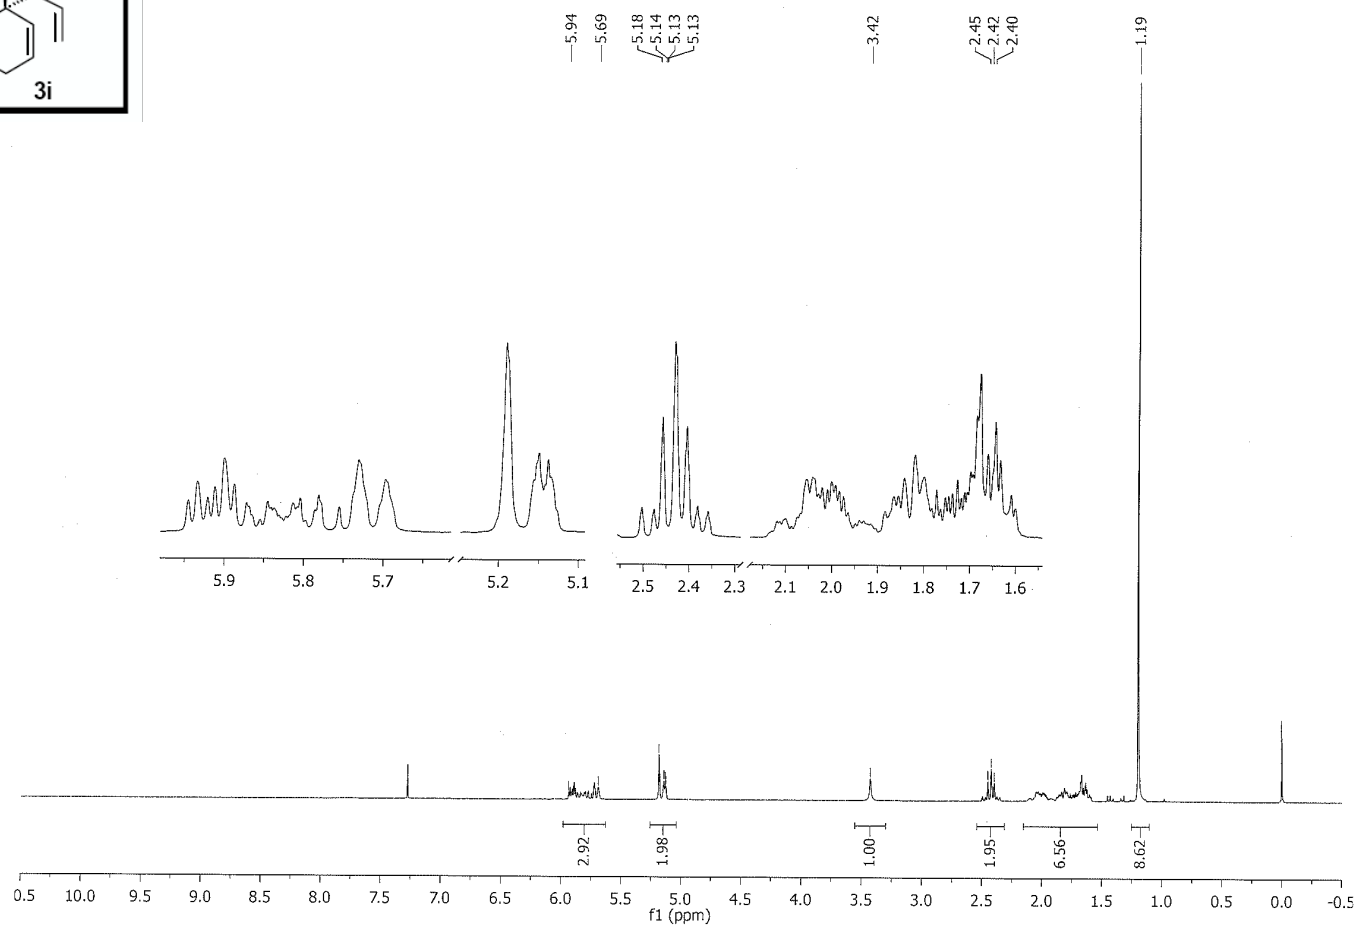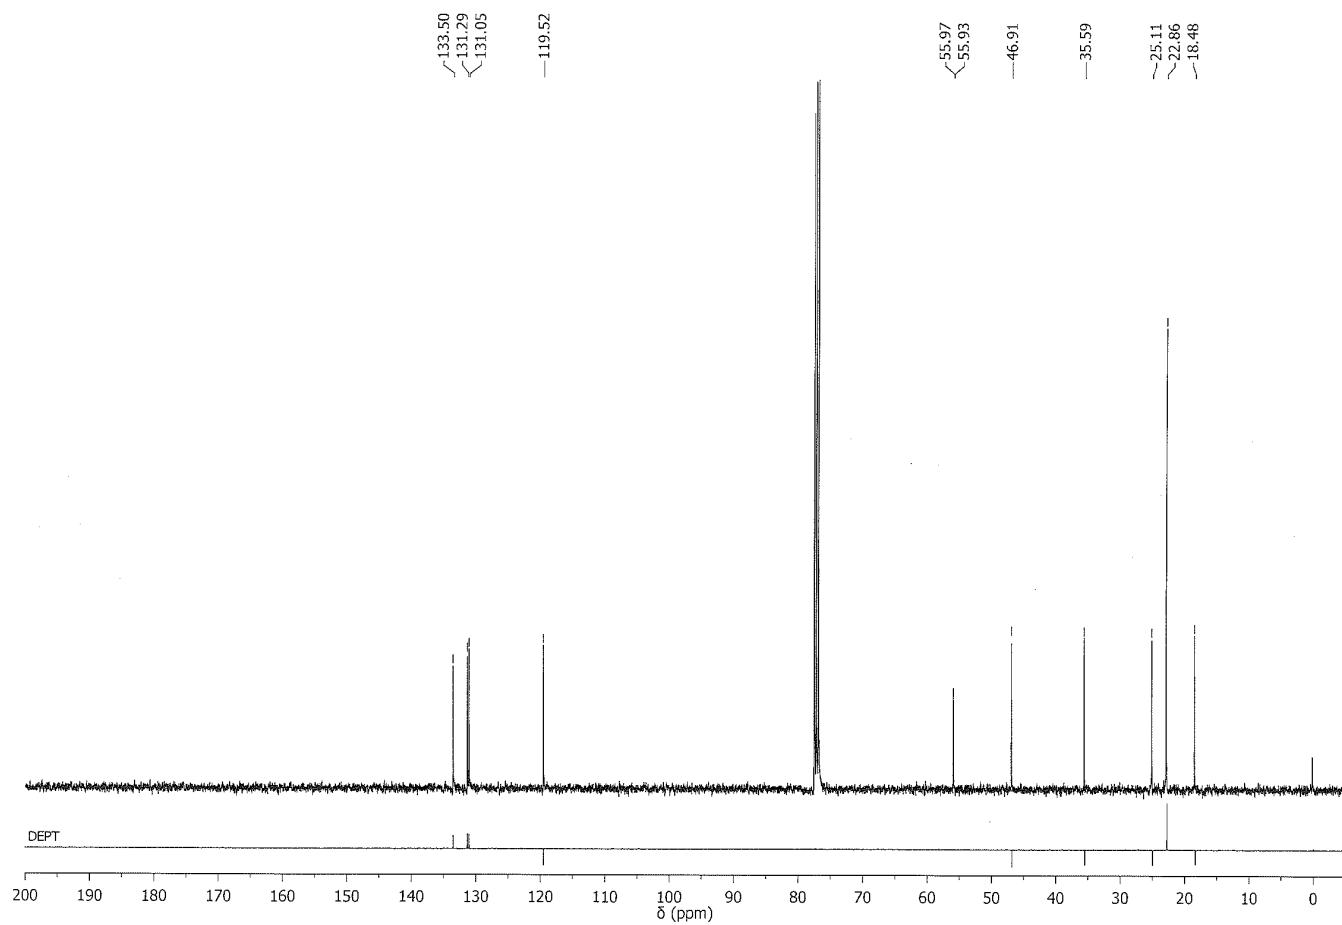



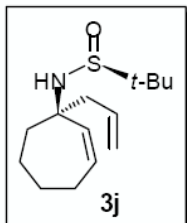

5.91  
5.90  
5.89  
5.88  
5.87  
5.86  
5.85  
5.83  
5.83  
5.82  
5.81  
5.79  
5.76  
5.72  
5.69  
5.60  
5.19  
5.18  
5.18  
5.15  
5.15  
5.14  
5.14  
5.13  
5.13

3.41  
2.51  
2.49  
2.46  
2.47  
2.47  
2.45  
2.16  
2.15  
1.84  
1.81  
1.75  
1.56  
1.55

<sup>1</sup>H NMR (300 MHz, CDCl<sub>3</sub>) δ 5.94 – 5.66 (m, 6H), 5.23 – 5.11 (m, 4H), 3.44 (d, *J* = 17.2 Hz, 2H), 2.48 (qdt, *J* = 13.8, 7.4, 1.1 Hz, 4H), 2.21 – 2.10 (m, 4H), 1.95 – 1.48 (m, 13H), 1.21 (s, 18H).

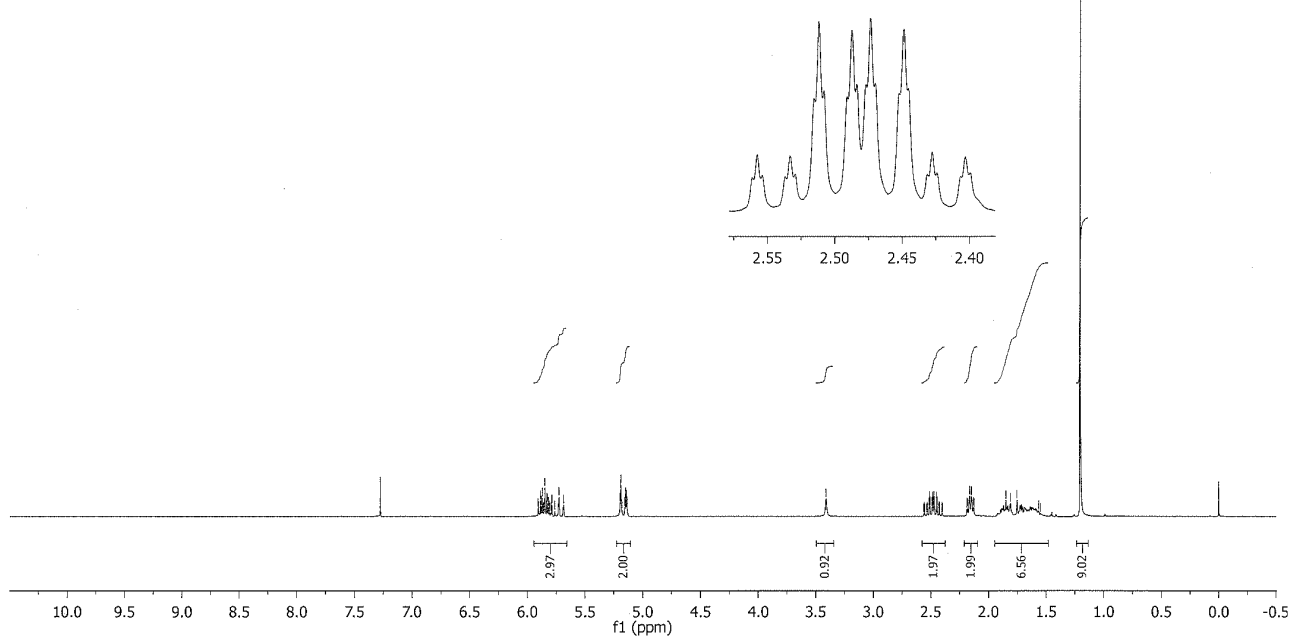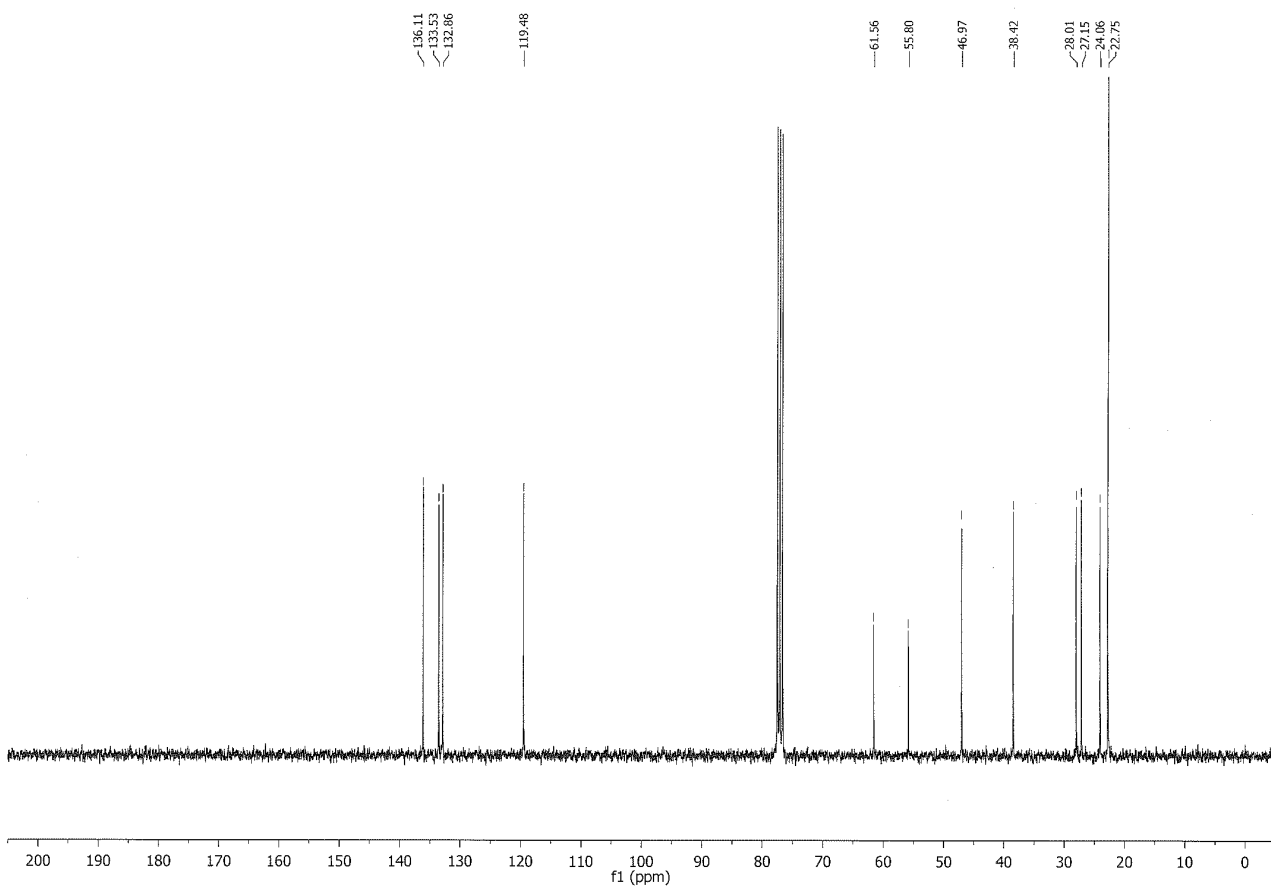

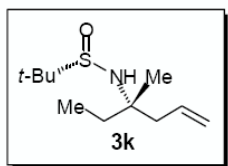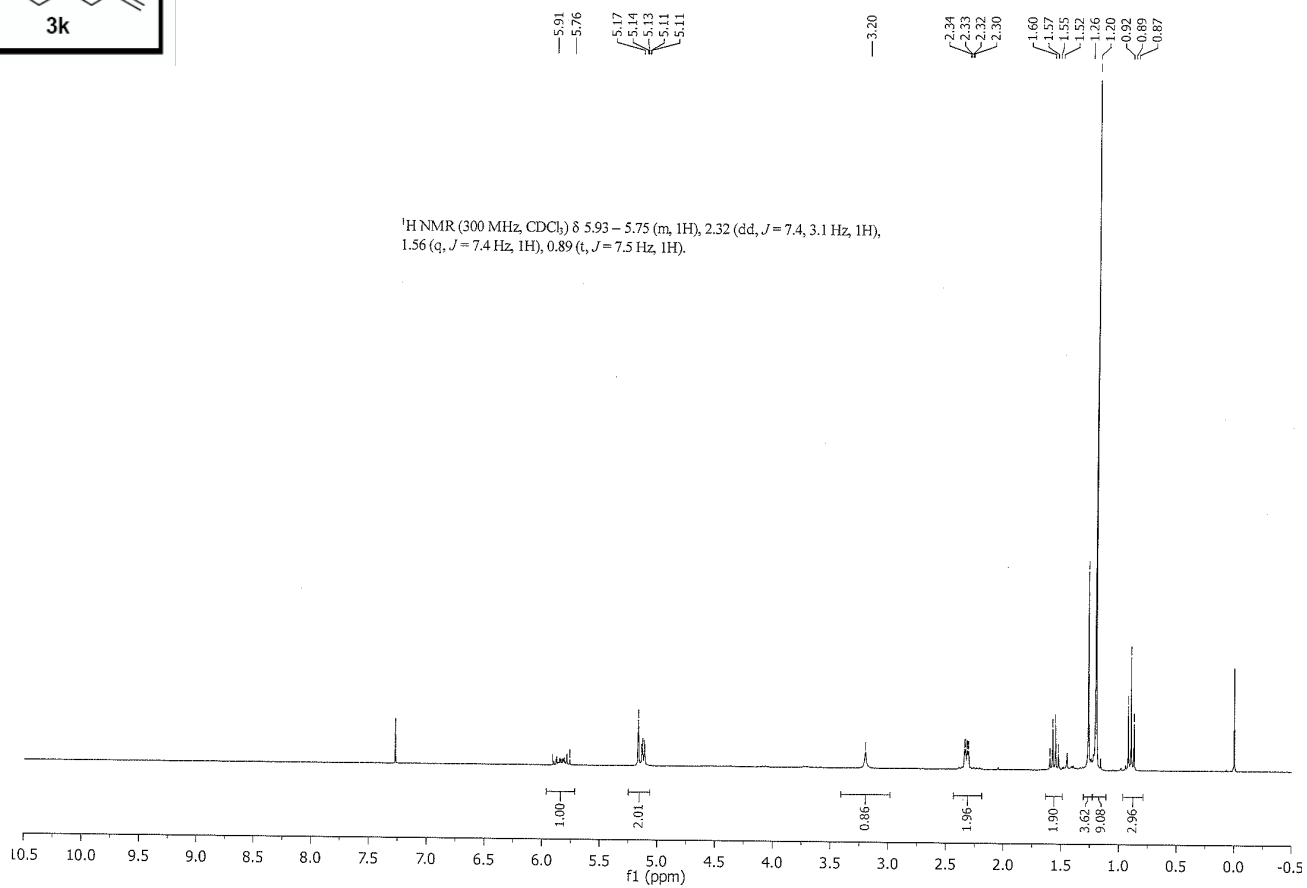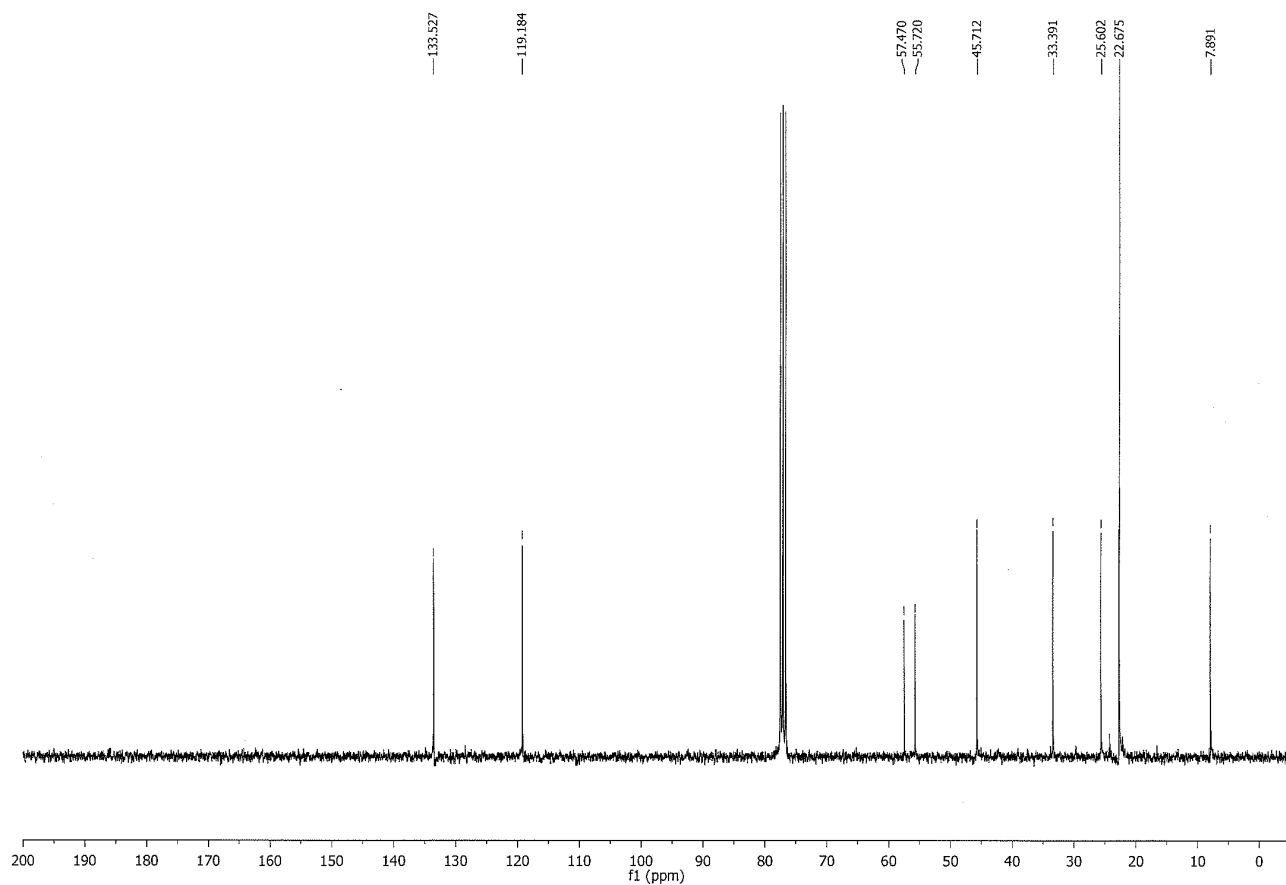

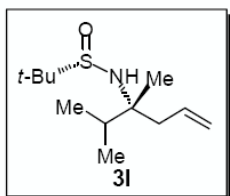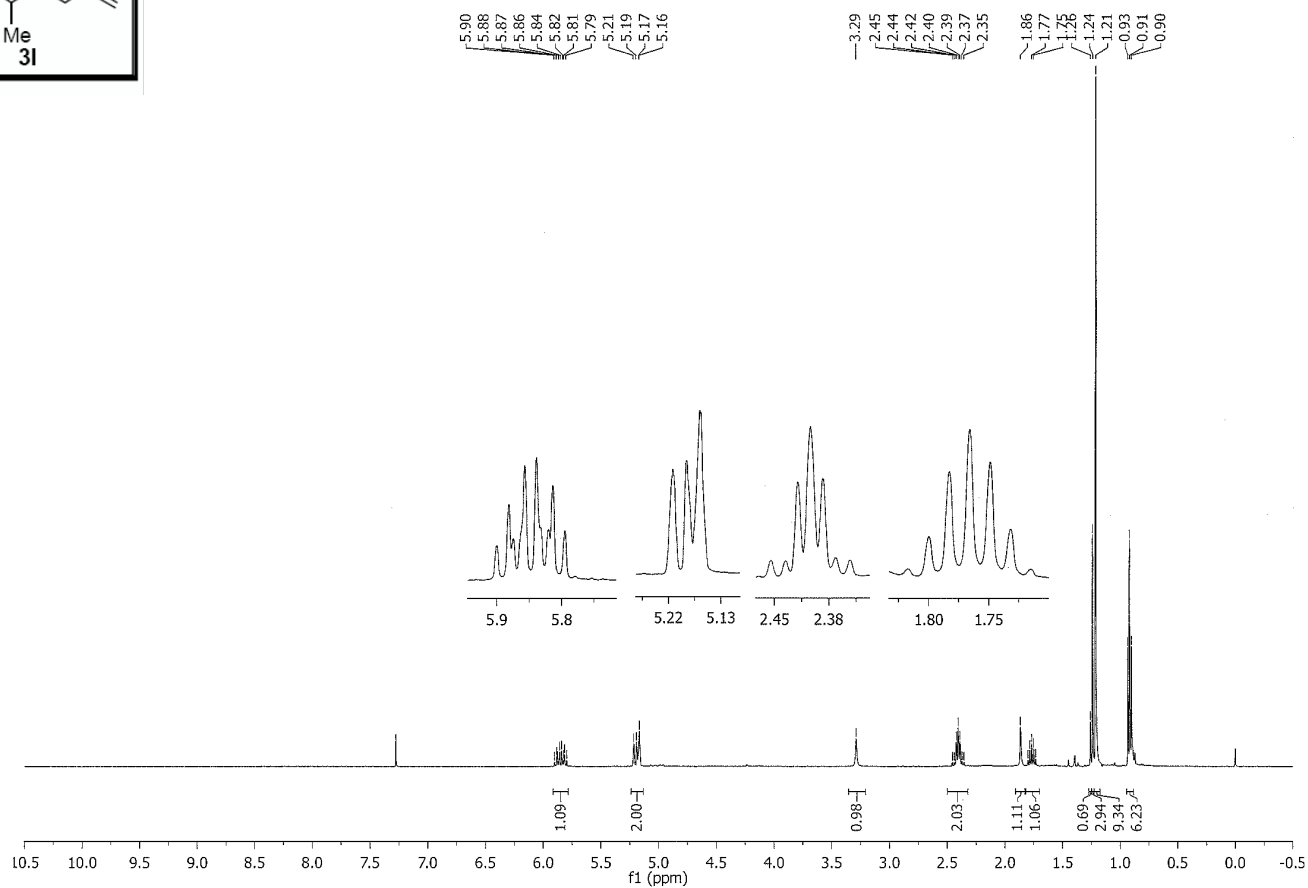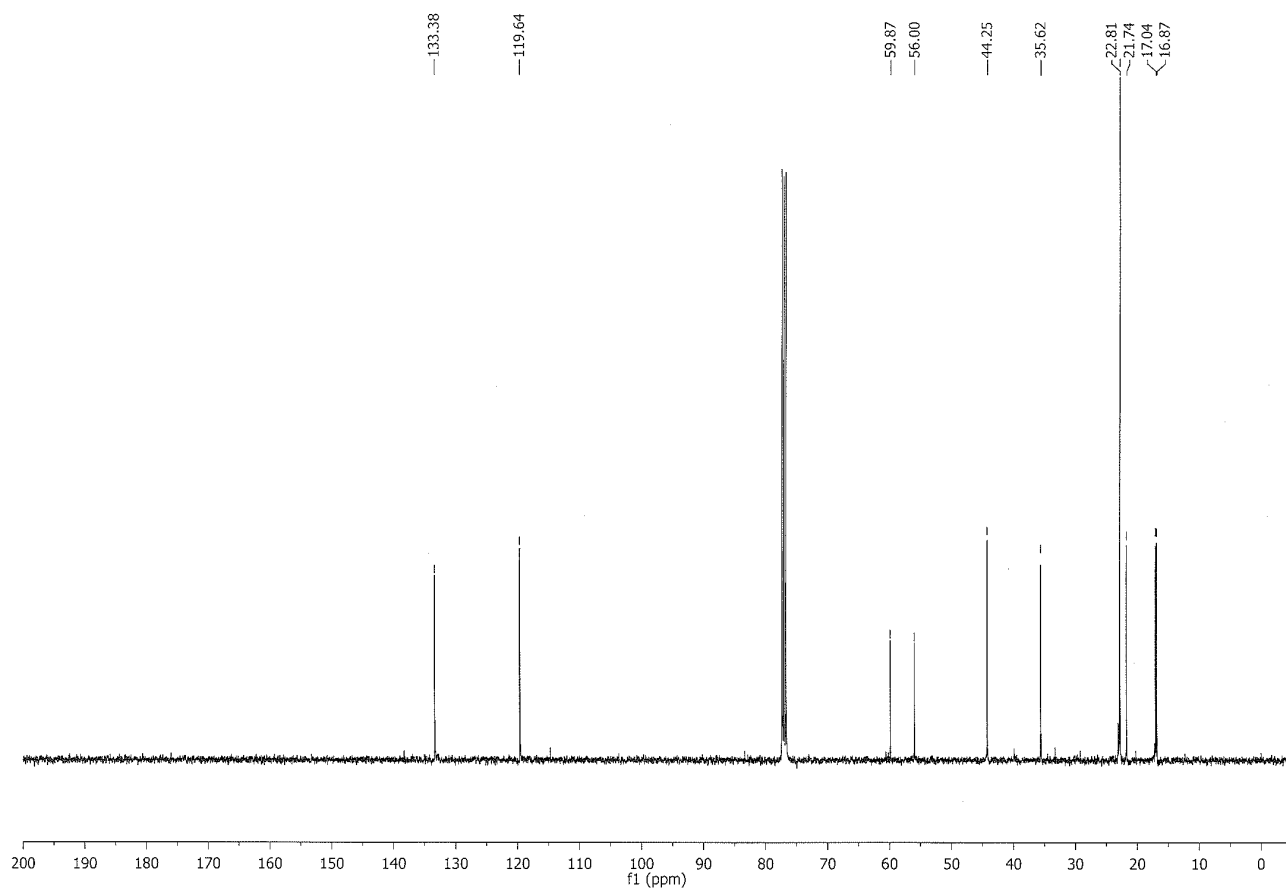

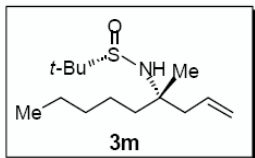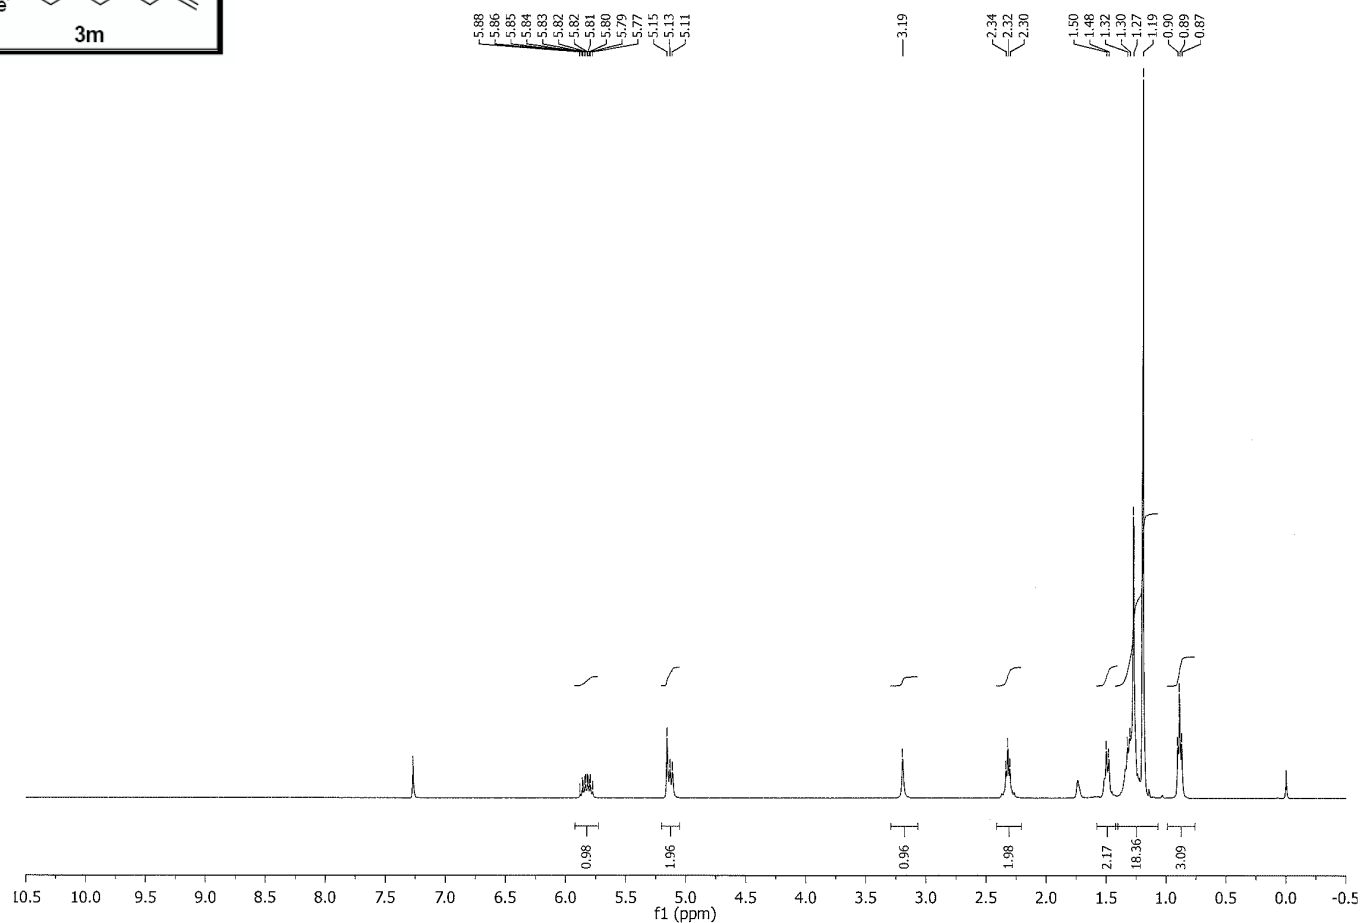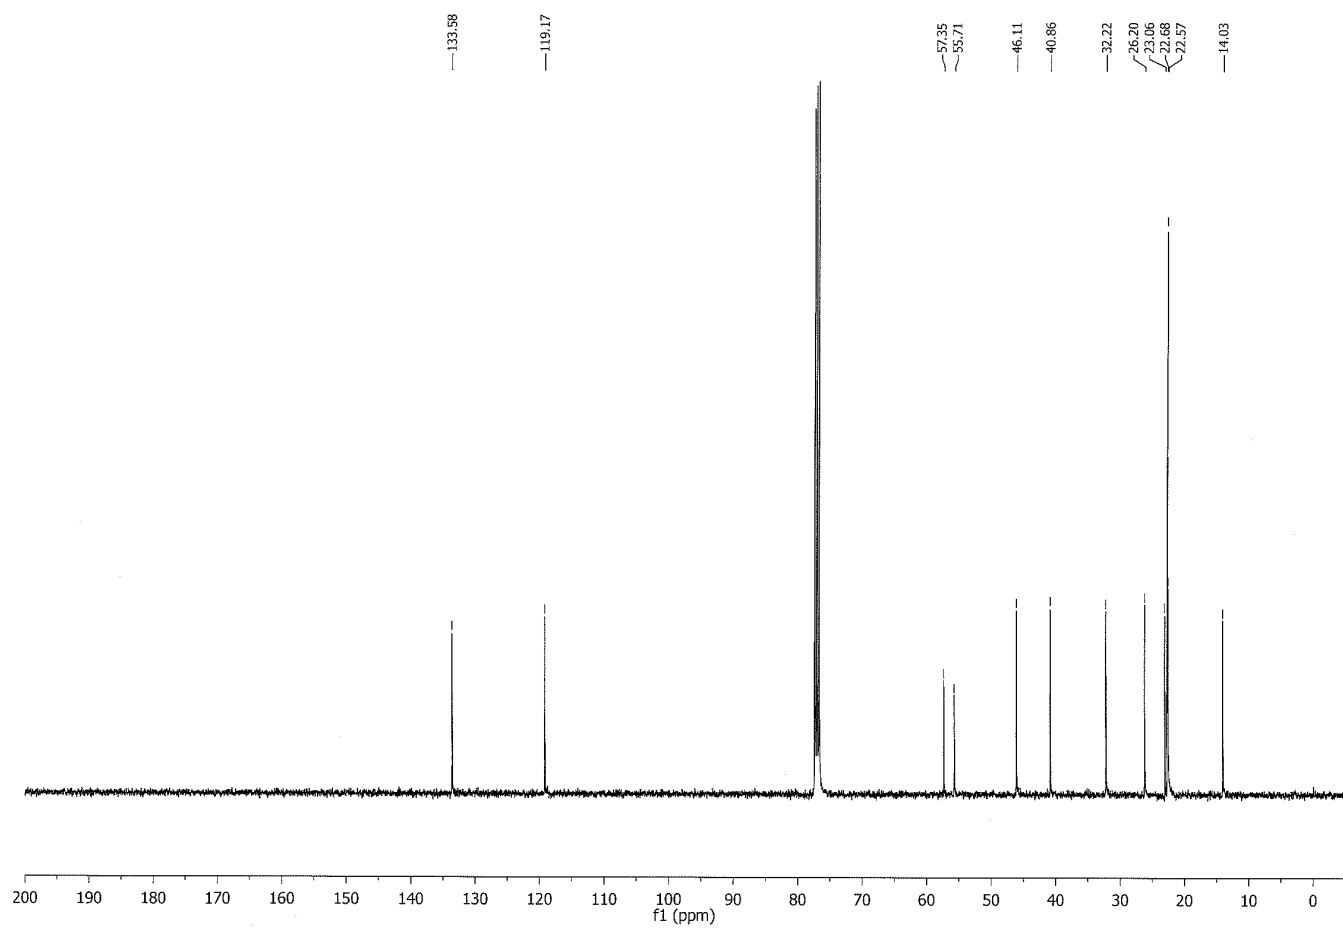

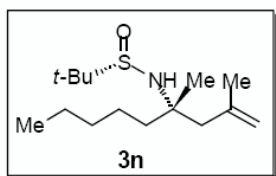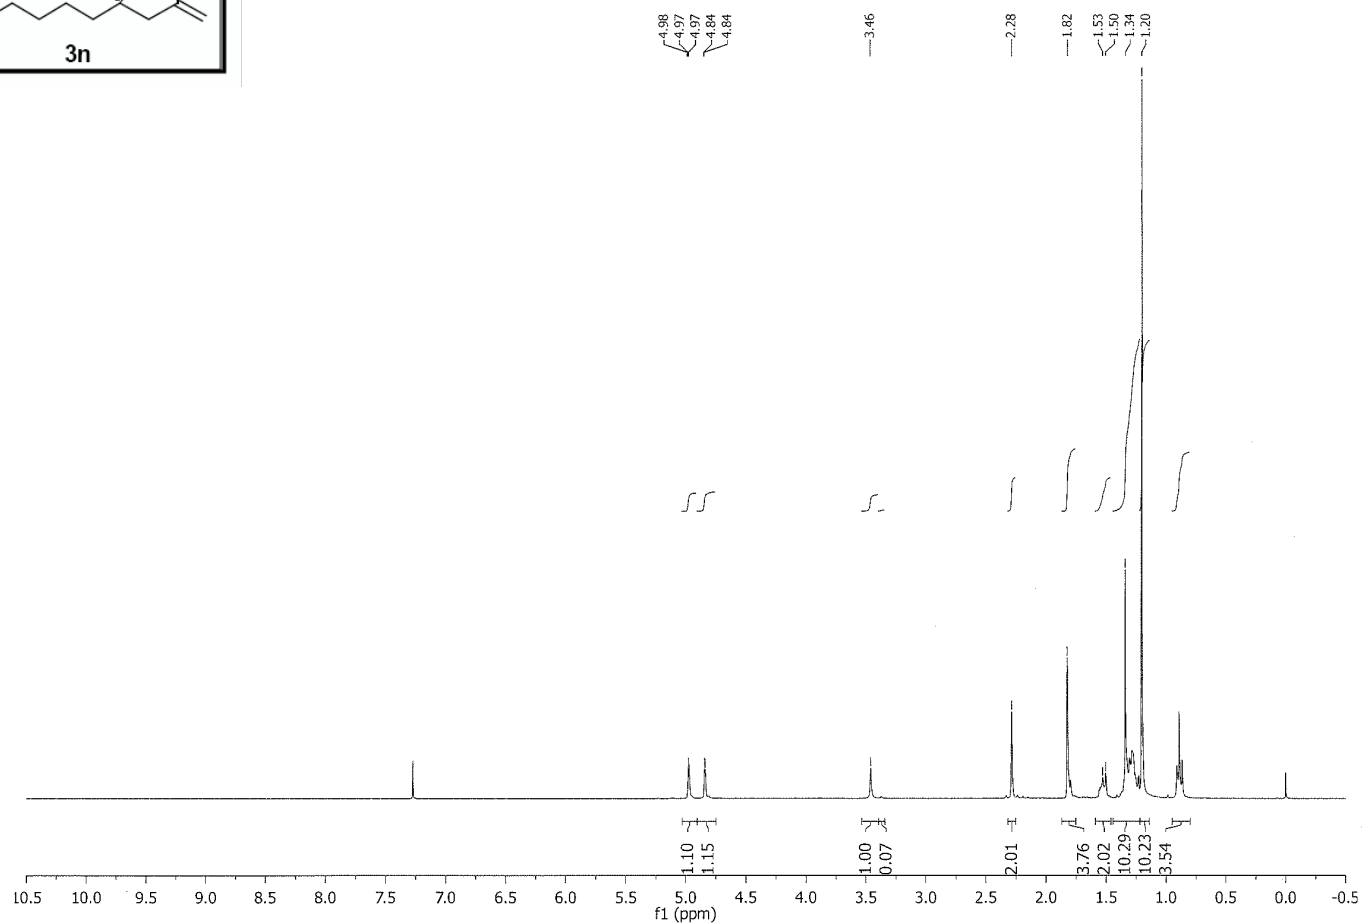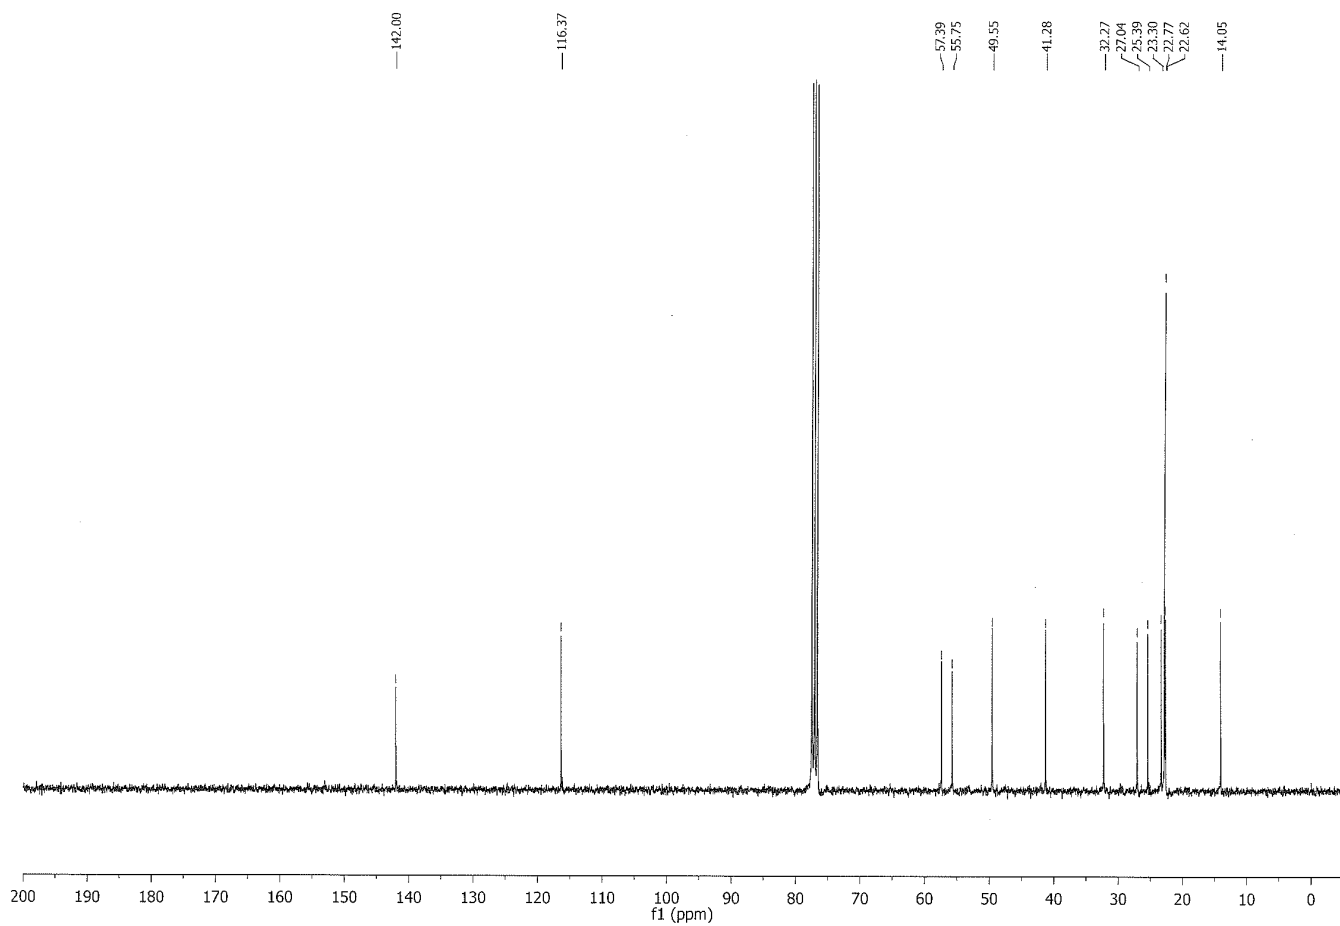

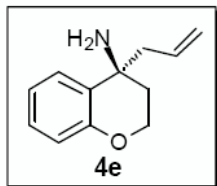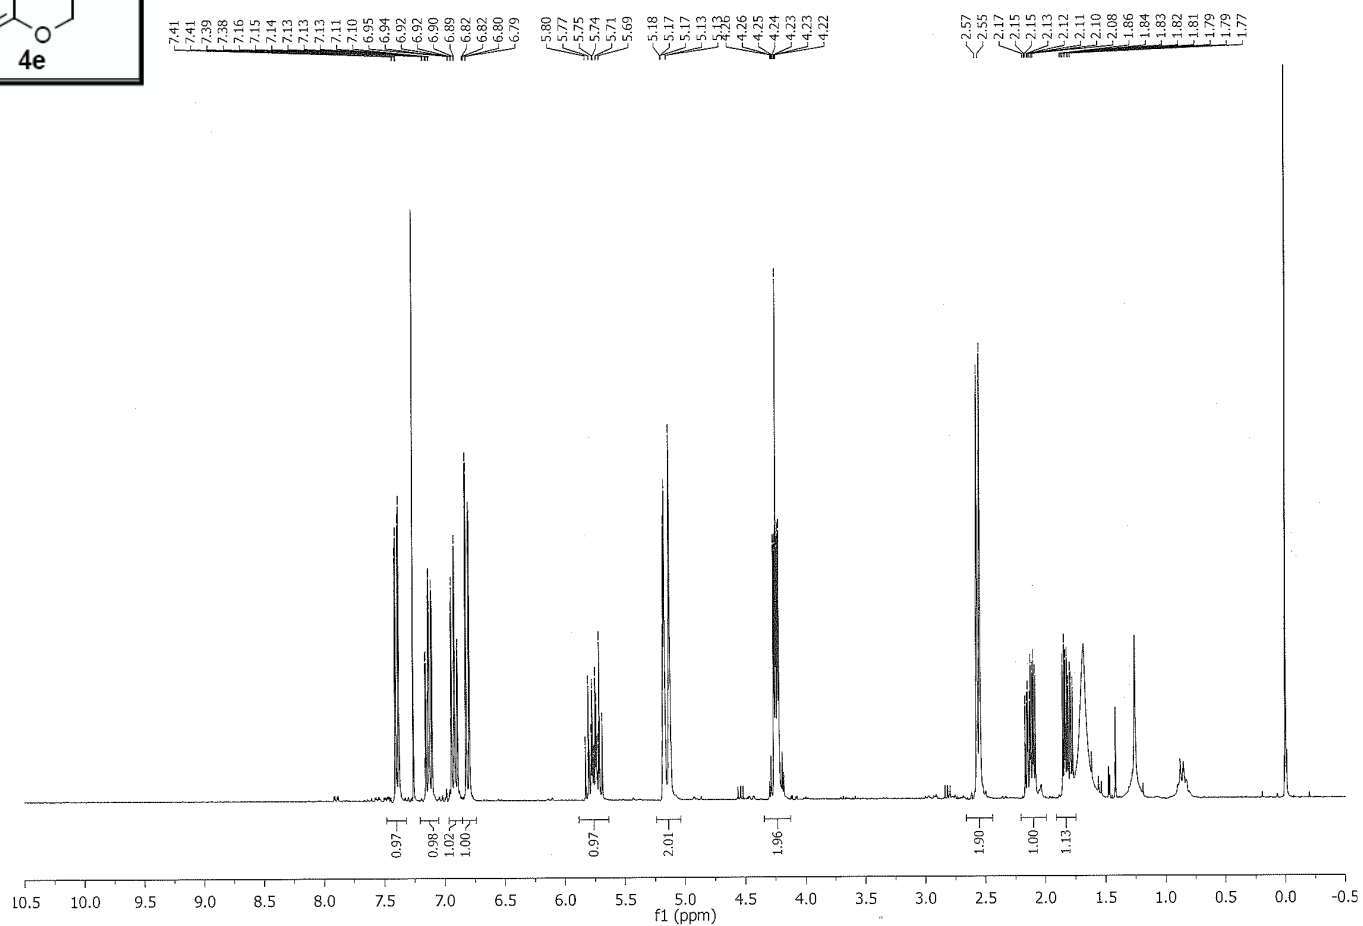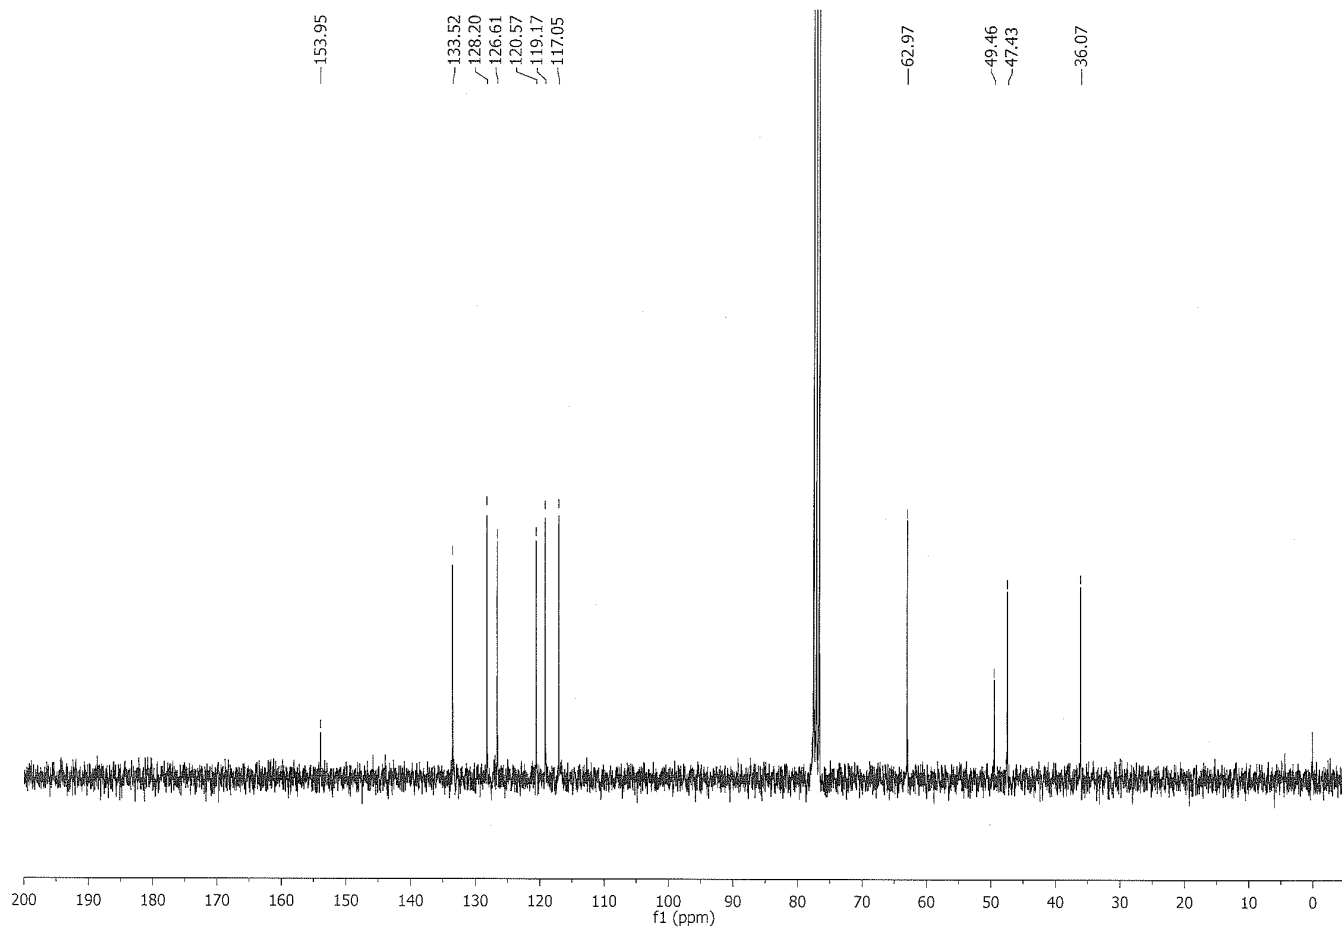

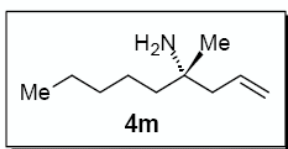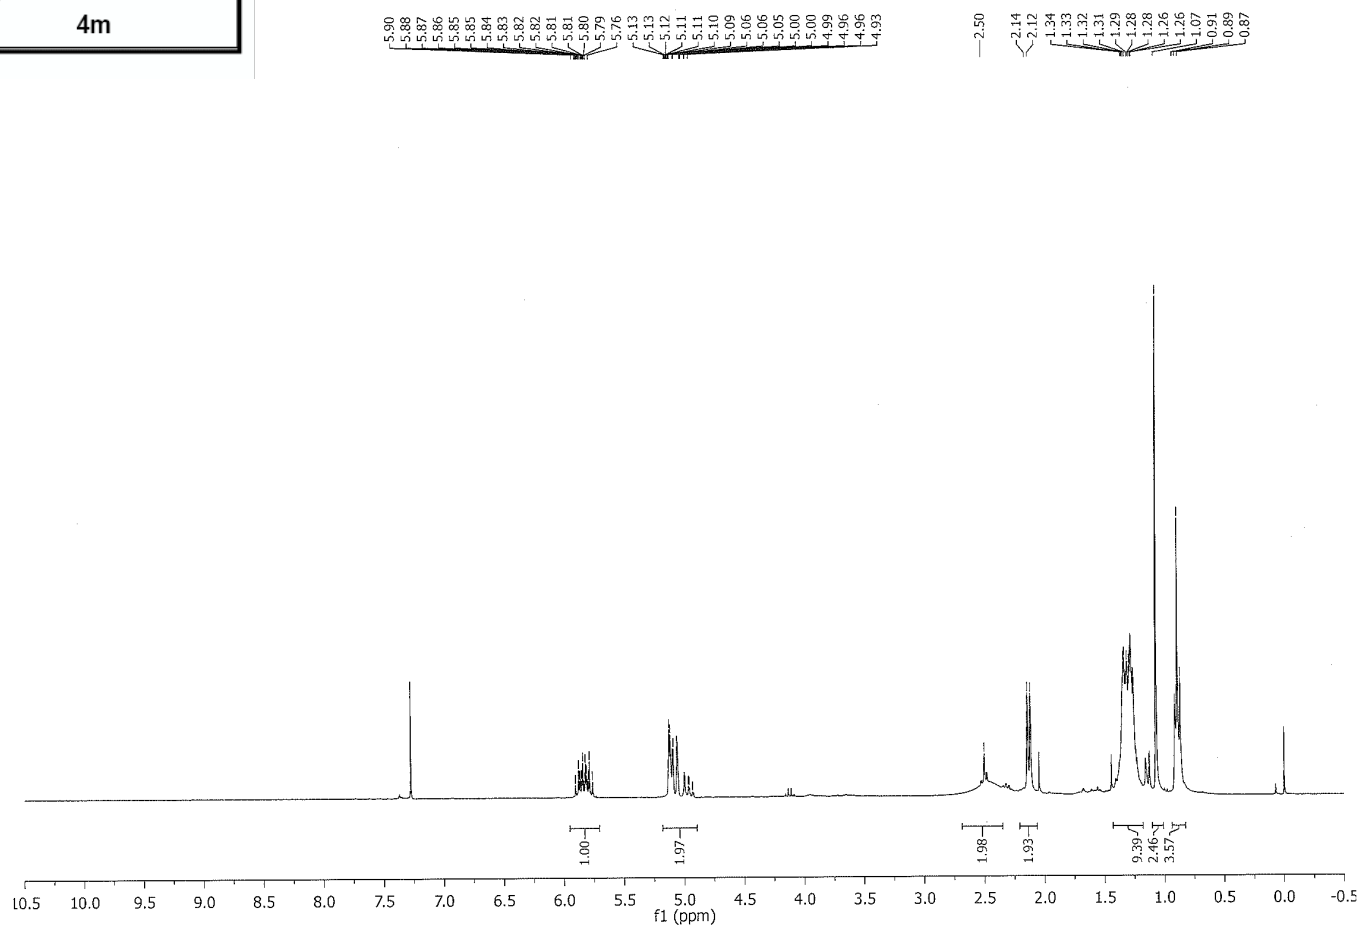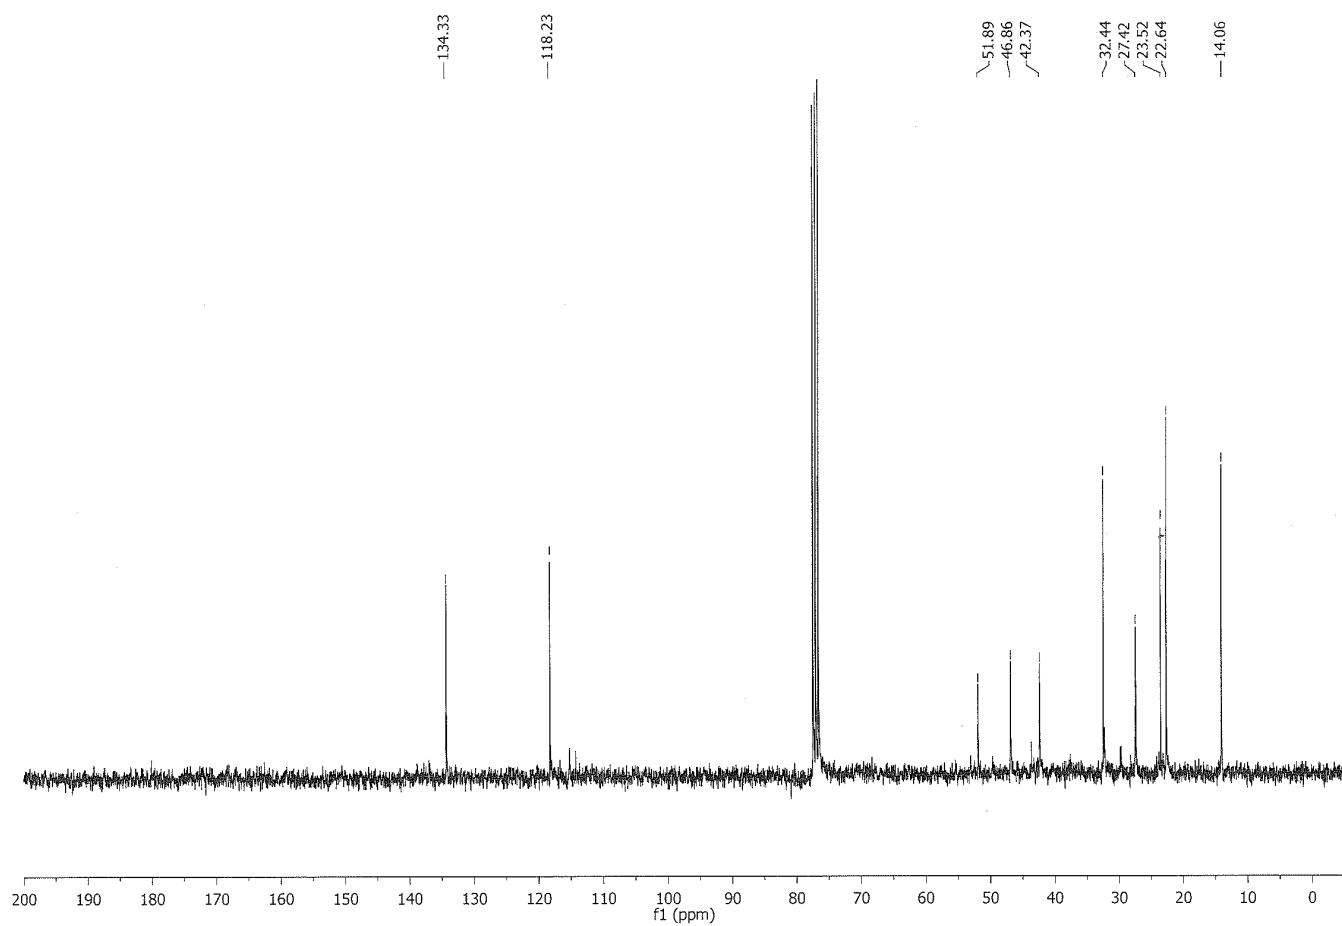

Supplement: c2cc17493f.pdf [file c2cc17493f.pdf]
